# Supplementary material
Source: HighWire-hosted journal article supplement (doi:10.1101/rna.078097.120)
Supplement: Supplemental_Information.docx [file Supplemental_Information.docx]

**SUPPORTING INFORMATION**

**Post-transcriptional modifications at the 37th position in the anticodon stem loop of tRNA: Structural insights from MD simulations**

Preethi Seelam Prabhakar, Nathania A. Takyi and Stacey D. Wetmore*

Department of Chemistry and Biochemistry, University of Lethbridge, 4401 University Drive West, Lethbridge, Alberta T1K 3M4 Canada

*E-mail: stacey.wetmore@uleth.ca. Tel.: (403) 329-2323. ORCID: 0000-0002-5801-3942

**TABLE OF CONTENTS**

Figure S1. (A) Backbone root-mean-square deviation (RMSD, Å) with respect to crystal structure (PDB ID: 3L0U), (B) average root-mean-square fluctuation (RMSF, Å) for individual nucleotides, and (C) probability distribution in the χ torsional angle (°) for the 37th nucleotide in A, G, and m1G-tRNAs in *E. coli…...*…………………………………………………………….………….07

Figure S2. (A) MD representative structures of A, G and m1G-tRNA in *E. coli*, with base 37 highlighted in red. (B) Dynamic cross-correlation maps for C1′atoms in unmodified A, G and m1G-tRNA over the MD simulations……………………………………………….…....….…...08

Figure S3. Distribution in the θ and η pseudo backbone torsional angles in the anticodon loop nucleotides for the unmodified A (black) and G-tRNA (light red) in *E. coli* over MD simulations……………………………………………………………………………………….09

Figure S4. Distribution in the χ and δ pseudo backbone torsional angles in the anticodon loop nucleotides for the unmodified A (black) and G-tRNA (light red) in *E. coli* over MD simulations……………………………………………………………………………………….10

Figure S5. Base stacking percentages between neighboring nucleotides in the anticodon loop for unmodified A (black) and G-tRNA (light red) in *E. coli* over MD simulations…………………..11

Figure S6. Comparison of backbone root-mean-square deviation (RMSD, Å) for modified and respective *E. coli* unmodified tRNA (A-tRNA in black and G-tRNA in light red) over the MD simulations…………………………………………………………………………………….....12

Figure S7. (A) MD representative structures of native and i6A-modified *E. coli* tRNA, with base 37 highlighted in red. (B) Dynamic cross-correlation maps for C1′ atoms in unmodified and i6A-modified tRNAs over the MD simulations………………………………………………...……..13

Figure S8. Comparison of average root-mean-square fluctuation (RMSF, Å) for individual nucleotides in modified and respective unmodified *E. coli* tRNA (A-tRNA in black and G-tRNA in light red) over the MD simulations………………………………………………………….....14

Figure S9. Distribution in the θ and η pseudo backbone torsional angles in the anticodon loop nucleotides for the unmodified (black) and i6A-modified *E. coli* tRNA (colored) over MD simulations.....................................................................................................................................15

Figure S10. Distribution in the χ and δ pseudo backbone torsional angles in the anticodon loop nucleotides for the unmodified A (black) and i6A-modified *E. coli* tRNAs (colored) over MD simulations…………………………………………………………………………………….....16

Figure S11. Base stacking percentages between neighboring nucleotides in the anticodon loop for unmodified A (black) and i6A-modified *E. coli* tRNAs (colored) over MD simulations………….17

Figure S12. Probability distribution in the χ torsional angle ((O4′C1′N9C4),°) for the 37th nucleotide in unmodified (A-tRNA in black and G-tRNA in light red) and modified (colored) *E. coli* tRNAs over the MD simulations………………………………………………………..........18

Figure S13. Comparison of structural deviation (RMSD, Å) of base 37 in modified and respective unmodified *E. coli* tRNA systems (A–tRNA, black; G–tRNA, light red) over the MD simulations……………………………………………………………………………………….19

Figure S14: Overlay of MD representative structure (blue) and crystal structure (red) for i6A (PDB ID: 5LZB) and ms2i6A-modified *E. coli* tRNA (PDB ID: 4V6F), highlighting the adoption of the crystal structure orientation during MD simulations……………………………………………..20

Figure S15. Distribution in hypermodification side chain conformations as a function of the dihedral angle  ((C6N6C10C11)) for i6A-modified *E. coli* tRNAs throughout the MD simulations.....................................................................................................................................21

Figure S16. (A) MD representative structures of native A and t6A-modified *E. coli* tRNA, with base 37 highlighted in red. (B) Dynamic cross-correlation maps for C1′ atoms in unmodified and t6A-modified tRNAs over the MD simulations…………………………………………………...22

Figure S17. Distribution in the θ and η pseudo backbone torsional angles in the anticodon loop nucleotides for the unmodified (black) and t6A-modified *E. coli* tRNA (colored) over MD simulations…………………………………………………………………………………….....23

Figure S18. Distribution in the χ and δ pseudo backbone torsional angles in the anticodon loop nucleotides for the unmodified A (black) and t6A-modified *E. coli* tRNAs (colored) over MD simulations…………………………………………………………………………………….....24

Figure S19. Base stacking percentages between neighboring nucleotides in the anticodon loop for unmodified A (black) and t6A-modified *E. coli* tRNAs (colored) over MD simulations………….25

Figure S20. Overlay of MD representative structure (blue) and crystal structure (red) for t6A (PDB ID: 1XMO) and ms2t6A-modified *E. coli* tRNA (PDB ID: 1FIR), highlighting the adoption of the crystal structure orientation during MD simulations……………………………………………..26

Figure S21. Distribution in hypermodification side chain conformations as a function of the dihedral angles 1 – 5 for t6A-modified *E. coli* tRNAs throughout the MD simulations……….27

Figure S22. (A) MD representative structures of native G, m1G and yW-modified *E. coli* tRNA, with base 37 highlighted in red. (B) Dynamic cross-correlation maps for C1′ atoms in unmodified and yW-modified *E. coli* tRNAs over the MD simulations……………….……………………....28

Figure S23. Distribution in the θ and η pseudo backbone torsional angles in the anticodon loop nucleotides for the unmodified G, m1G and yW-modified *E. coli* tRNA over MD simulations…..29

Figure S24. Distribution in the χ and δ pseudo backbone torsional angles in the anticodon loop nucleotides for the unmodified G, m1G and yW-modified *E. coli* tRNA over MD simulations......30

Figure S25. Base stacking percentages between neighboring nucleotides in the anticodon loop for unmodified G, m1G-tRNA and yW-modified *E. coli* tRNAs over MD simulations…………..…..31

Figure S26: Overlay of MD representative structure (blue) and crystal structure (red) for yW-modified tRNA (PDB ID: 1I9V), highlighting the adoption of the crystal structure orientation during MD simulations in (A) *E. coli* and (B) Yeast…………………………..……………….....32

Figure S27. Distribution in hypermodification side chain conformations as a function of the dihedral angles 1 – 6 for yW-modified *E. coli* tRNAs throughout the MD simulations……….33

Figure S28. (A) tRNA sequences considered in the present study, with the nucleotides included in the anticodon loop in the blue box. (B) MD representative structures of native G, m1G and yW-tRNA in yeast, with base 37 highlighted in red. (C) Dynamic cross-correlation maps for C1′ atoms in unmodified G, m1G and yW tRNAs over the MD simulations in yeast………………..……….34

Figure S29. (A) Comparison of backbone root-mean-square deviation (RMSD, Å) and (B) average root-mean-square fluctuation (RMSF, Å) for individual nucleotides in G, m1G and yW-tRNA in *E. coli* and yeast over the MD simulations.………………………...……………………………..35

Figure S30. Distribution in the θ and η pseudo backbone torsional angles in the anticodon loop nucleotides for unmodified G, m1G and yW-modified yeast tRNA over MD simulations in yeast……………………………………………………………………………………………...36

Figure S31. Distribution in the χ and δ pseudo backbone torsional angles in the anticodon loop nucleotides for unmodified G, m1G and yW-modified yeast tRNA over MD simulations in yeast……………………………………………………………………………………………...37

Figure S32. (A) Comparison of the root-mean-square deviation (RMSD, Å) in the G, m1G and yW nucleotide at the 37th position of *E. coli* and yeast tRNA over the MD simulations. (B) Overlays of the yW modified nucleobase in *E. coli* and yeast tRNA with respect to the nucleobase ring for structures taken at 5 ns intervals over the MD simulations. …...………………………………….38

Figure S33. Base stacking percentages between neighboring nucleotides in the anticodon loop for unmodified G, m1G and yW-modified *E. coli* and yeast tRNAs over MD simulations…………39

Figure S34: Overlay of modified tRNA crystal structures representing unbound (left), enzyme-bound (tRNA-dihydrouridine synthase, middle) and ribosomal bound (right) tRNA with (A) crystal structure of unmodified tRNA (PDB ID: 3L0U, blue) or (B) MD representative structure of modified tRNA containing i6A at position 37 (blue) …….………………………………….…40

Figure S35: Comparison of average root-mean-square fluctuation (RMSF, Å) for individual nucleotides in unmodified A-tRNA (black) and t6A-modified *E. coli* tRNA averaged over three MD simulation replicas…………………………………………………………….…………….41

Figure S36: Average structural deviation of anticodon nucleotides (RMSF, Å) over the MD simulations for each i6A-modified tRNA compared to unmodified *E. coli* A-tRNA averaged over three MD simulation replicas……………………...……………………………………………..41

Figure S37: Comparison of average root-mean-square fluctuation (RMSF, Å) for individual nucleotides in unmodified A-tRNA (black) and t6A-modified *E. coli* tRNA averaged over three MD simulation replicas…...……………………………………………………………………...42

Figure S38: Average structural deviation of anticodon nucleotides (RMSF, Å) over the MD simulations for each t6A-modified tRNA compared to unmodified *E. coli* A-tRNA averaged over three MD simulation replicas…………………………………………………………………….42

Figure S39: Comparison of average root-mean-square fluctuation (RMSF, Å) for individual nucleotides in unmodified G, m1G and yW-modified *E. coli* tRNAs averaged over three MD simulation replicas………………………………………………...……………………………..43

Figure S40: Average structural deviation of anticodon nucleotides (RMSF, Å) over the MD simulations for each unmodified G, m1G and yW-modified *E. coli* tRNAs MD simulation replicas………………………………………………………………………………..………….43

Figure S41: Distribution in the conformations of the bulky moiety of the i6A-modified *E. coli* tRNA nucleotides with respect to φ averaged over the three MD simulation replicas...…………..44

Figure S42. Distribution in the conformations of the bulky moiety of the t6A-modified *E. coli* tRNA nucleotides with respect to ω1, ω2, ω3, ω4, and ω5 averaged over three MD simulation replicas…………………………….……………………………………………………………..45

Figure S43. Distribution in the conformations of the bulky moiety of the yW-modified *E. coli* tRNA nucleotides with respect to ψ1, ψ2, ψ3, ψ4, and ψ5 averaged over three MD simulation replicas………………………………………………………..………………………………….46

Table S1: Average root-mean-square deviations in the backbone (avg. RMSD, Å) and standard deviations (in parentheses) for each *E. coli* tRNA over the MD simulations……………………...47

Table S2: Percent occupancy of hydrogen bonds in the anticodon stem loop of *E. coli* tRNA over the MD simulations...………………………………………………………………………….....48

Table S3: Average donor–acceptor (D–A) hydrogen-bond distances (Å) in the anticodon stem loop of *E. coli* tRNA over the MD simulations………………………………………………………...49

Table S4: Average donor–hydrogen–acceptor hydrogen-bond angle (°) in the anticodon stem loop of *E. coli* tRNA over the MD simulations………………………….……………………………..50

Table S5: Average nucleotide distance (C1′–C1′, Å) between base pairs in the anticodon stem loop of *E. coli* tRNA over the MD simulations (standard deviation in parentheses) ..............................51

Table S6: Base stacking propensities (percentage) between nucleotides in the anticodon stem loop of *E. coli* tRNA over the MD simulations.......................................................................................52

Table S7: Average glycosidic torsion angle (χ, °) for nucleotides in the anticodon stem loop of *E. coli* tRNA over the MD simulations (standard deviation in parentheses) ……….………………..53

Table S8: Average nucleobase stacking interaction energies (standard deviations in parentheses, kcal/mol) for each *E. coli* tRNA over the MD simulations………………………………..……....54

Table S9: Lowest, highest and average 33–37 base pair interaction energies (standard deviations in parentheses, kcal/mol) for each *E. coli* tRNA over the MD simulations…………………….…55

Table S10: Average root-mean-square deviations in the backbone (avg. RMSD, Å) and standard deviations (in parentheses) for each *E. coli* tRNA over three MD simulation replicas…………....56

Table S11: Percent occupancy, average donor–acceptor (D–A) hydrogen-bond distances (Å) and average donor–hydrogen–acceptor hydrogen-bond angle (°) for hydrogen bonds in the anticodon stem loop of *E. coli* tRNA over three MD simulation replicas……………………...…………….57

Table S12: Base stacking propensities (percentage) between nucleotides in the anticodon stem loop of *E. coli* tRNA over three MD simulation replicas………………….…………………………...58

Table S13: Average root-mean-square deviations in the backbone (avg. RMSD, Å) and standard deviations (in parentheses) for each yeast tRNA over three MD simulation replicas………...…...59

Table S14: Base stacking propensities (percentage) between nucleotides in the anticodon stem loop of yeast tRNA over three MD simulation replicas, as well as the average and standard deviation between replicas.………………………………………………………………………………....60

Table S15: Percent occupancy, average donor–acceptor (D–A) hydrogen-bond distances (Å) and average donor–hydrogen–acceptor hydrogen-bond angle (°) for hydrogen bonds in the anticodon stem loop of yeast tRNA over three MD simulation replicas, as well as the average and standard deviation between replicas…………………………………………………..…………………...61

Tables S16–S24: Atomic names, coordinates, AMBER atom types and partial charges for modified bases……………………………………………………………………………………………...62


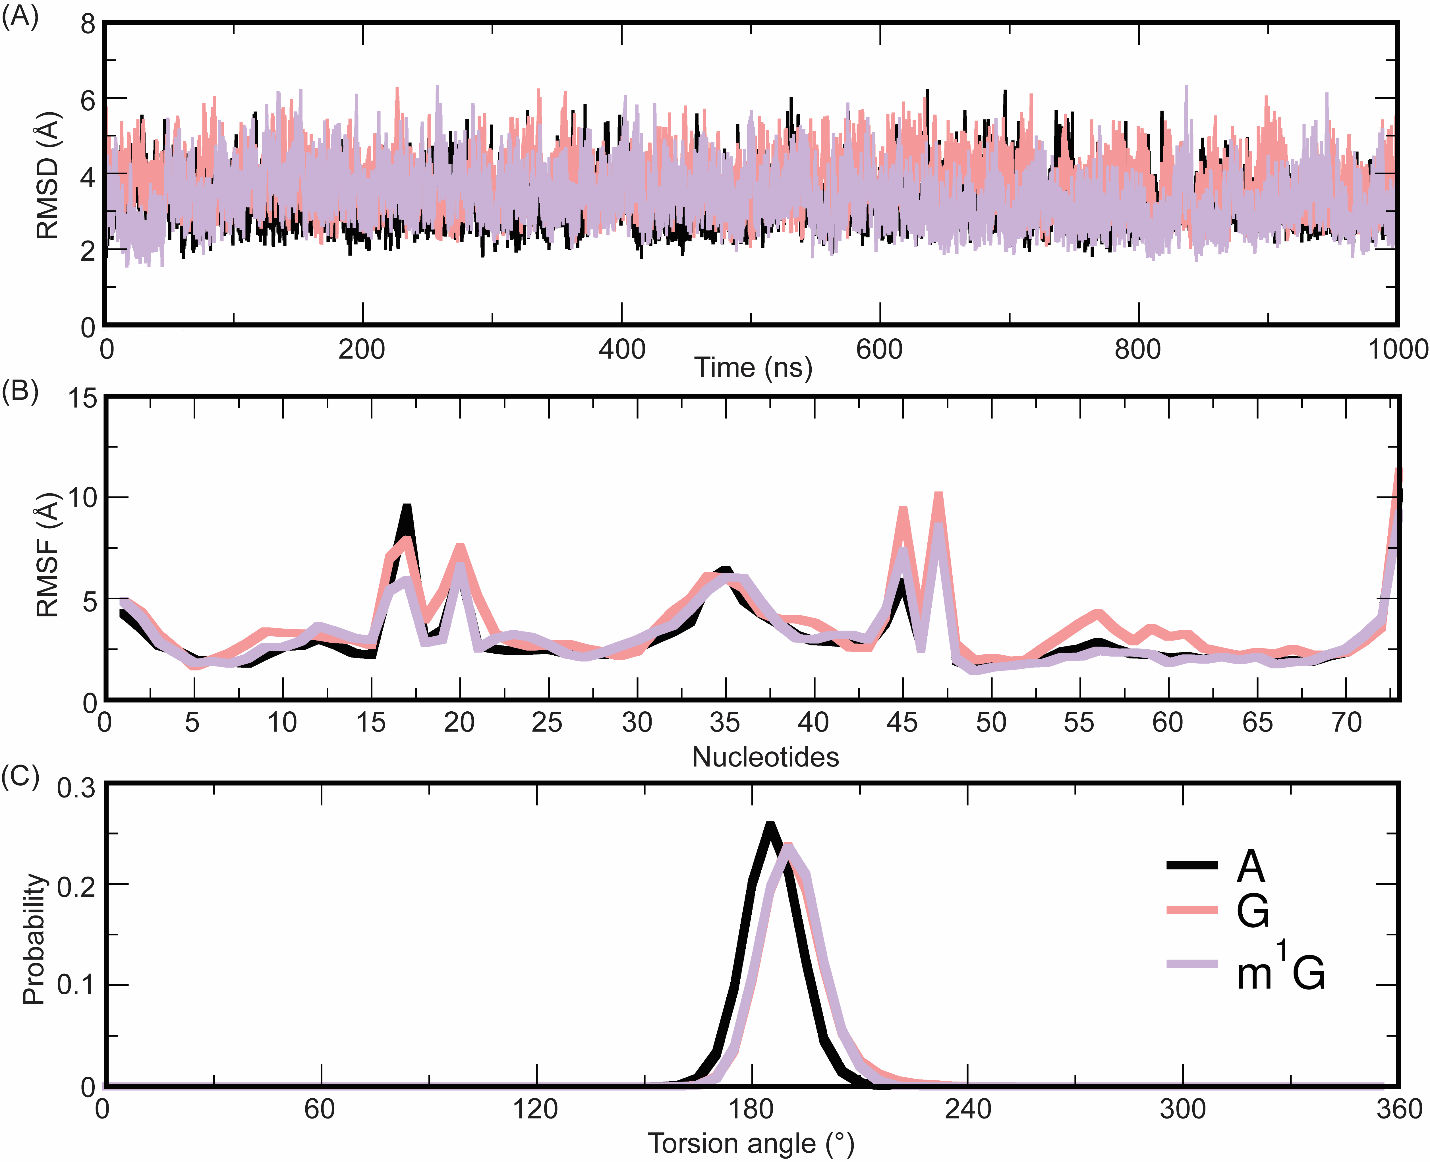


Figure S1. (A) Backbone root-mean-square deviation (RMSD, Å) with respect to crystal structure (PDB ID: 3L0U), (B) average root-mean-square fluctuation (RMSF, Å) for individual nucleotides, and (C) probability distribution in the χ torsional angle (°) for the 37th nucleotide in A, G, and m1G-tRNAs in *E. coli*.


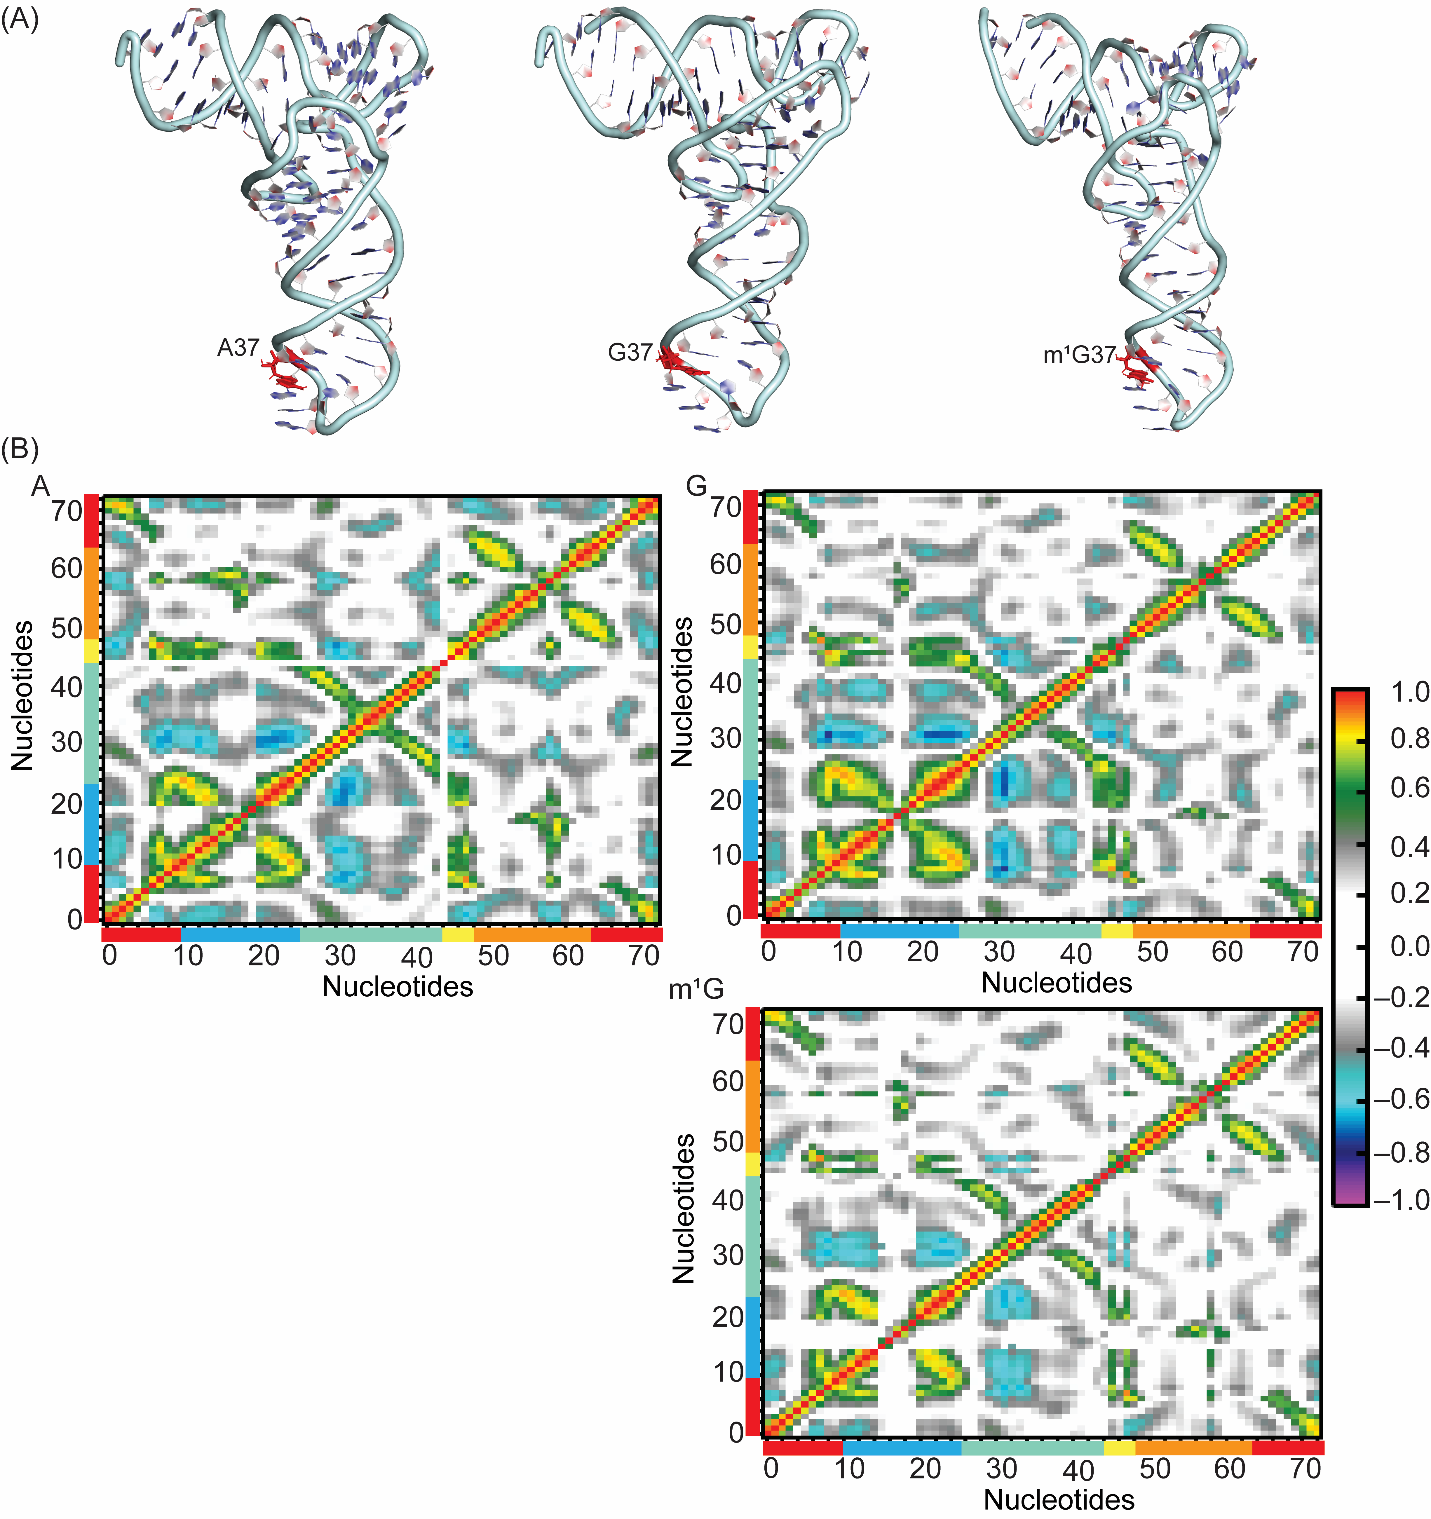


Figure S2. (A) MD representative structures of A, G and m1G-tRNA in *E. coli*, with base 37 highlighted in red. (B) Dynamic cross-correlation maps for C1′ atoms in unmodified A, G and m1G-tRNA over the MD simulations. The axial color band corresponds to different helical domains in tRNA (red–ACS; blue–DSL; green–ASL; yellow–variable arm; orange–TSL).


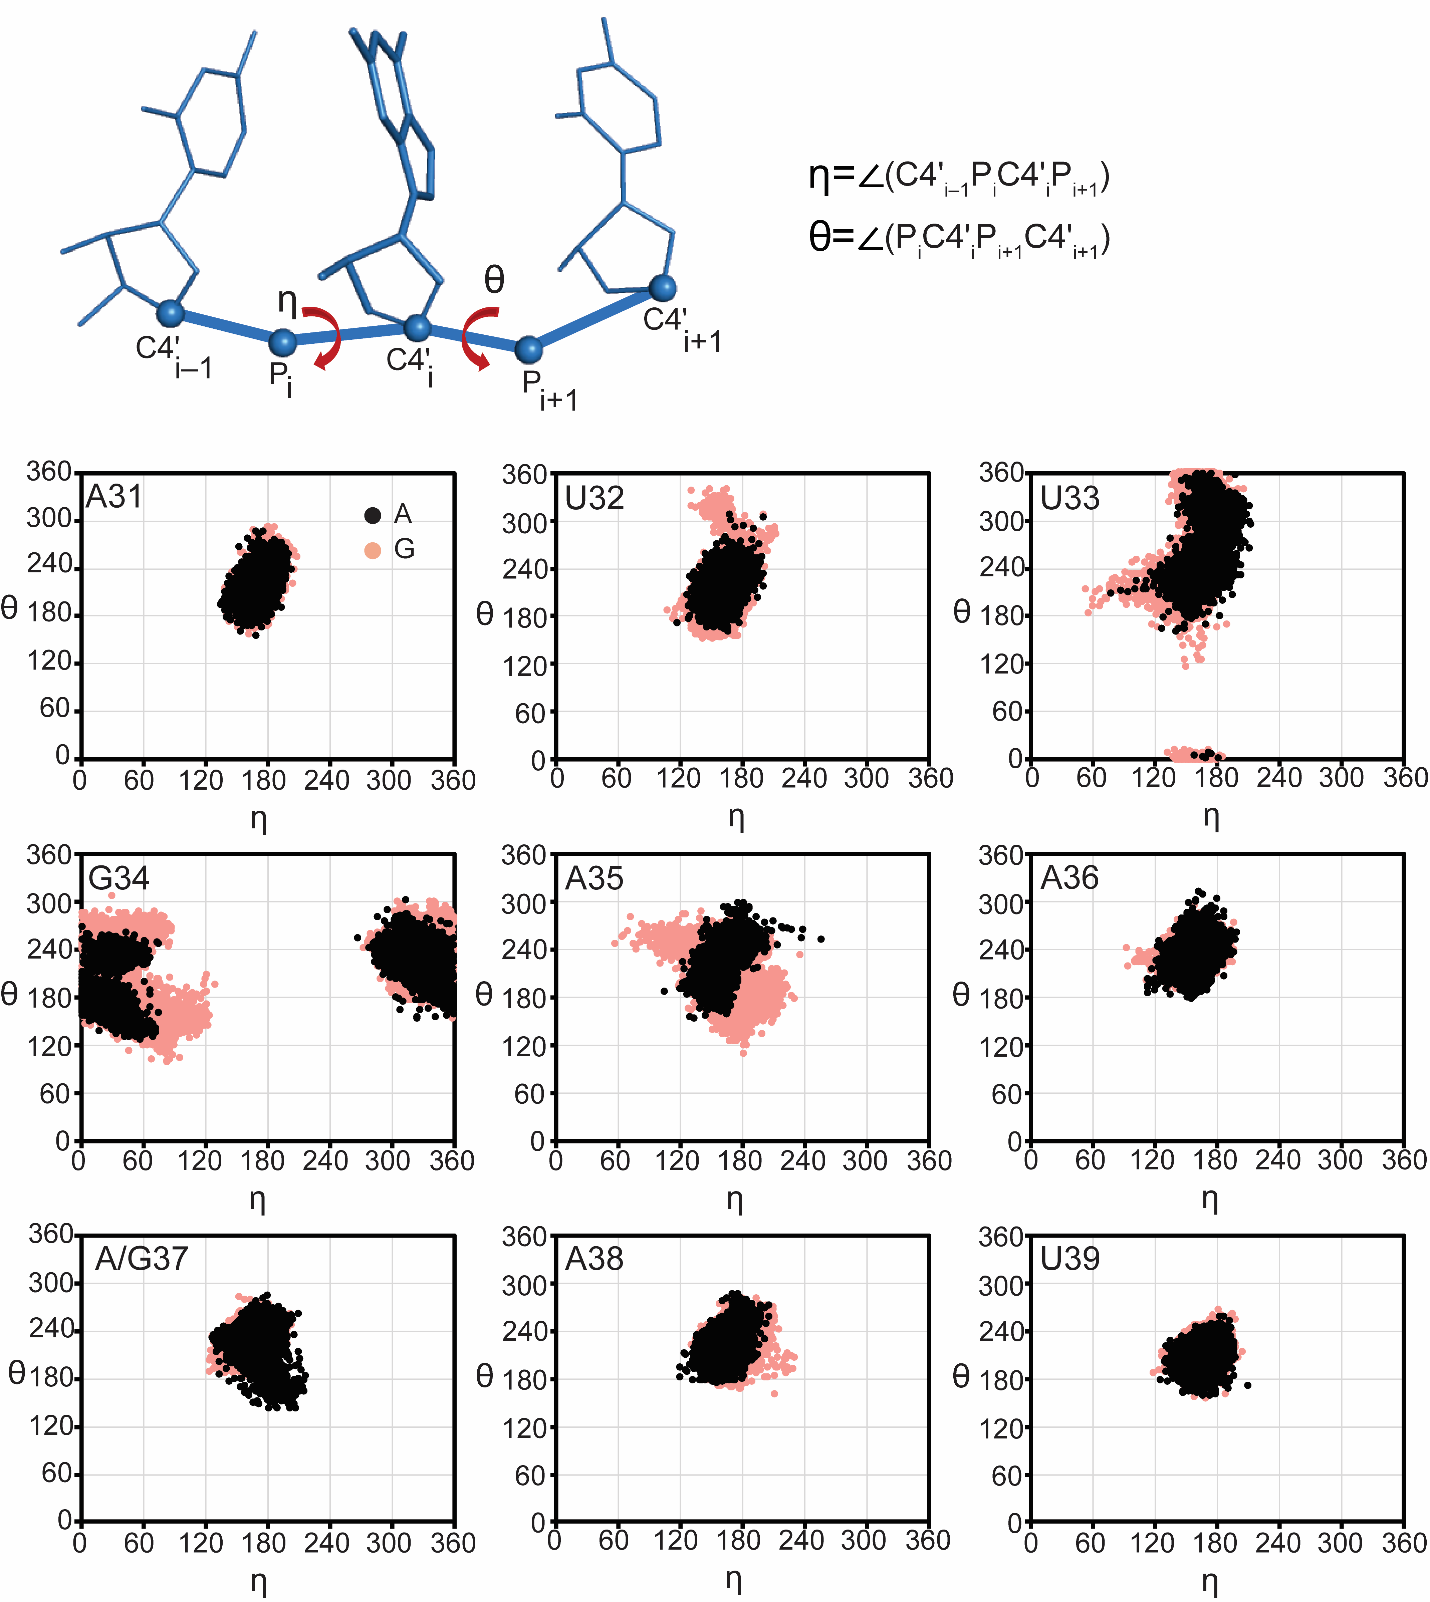


Figure S3. Distribution in the θ and η pseudo backbone torsional angles in the anticodon loop nucleotides for the unmodified A (black) and G-tRNA (light red) in *E. coli* over MD simulations.


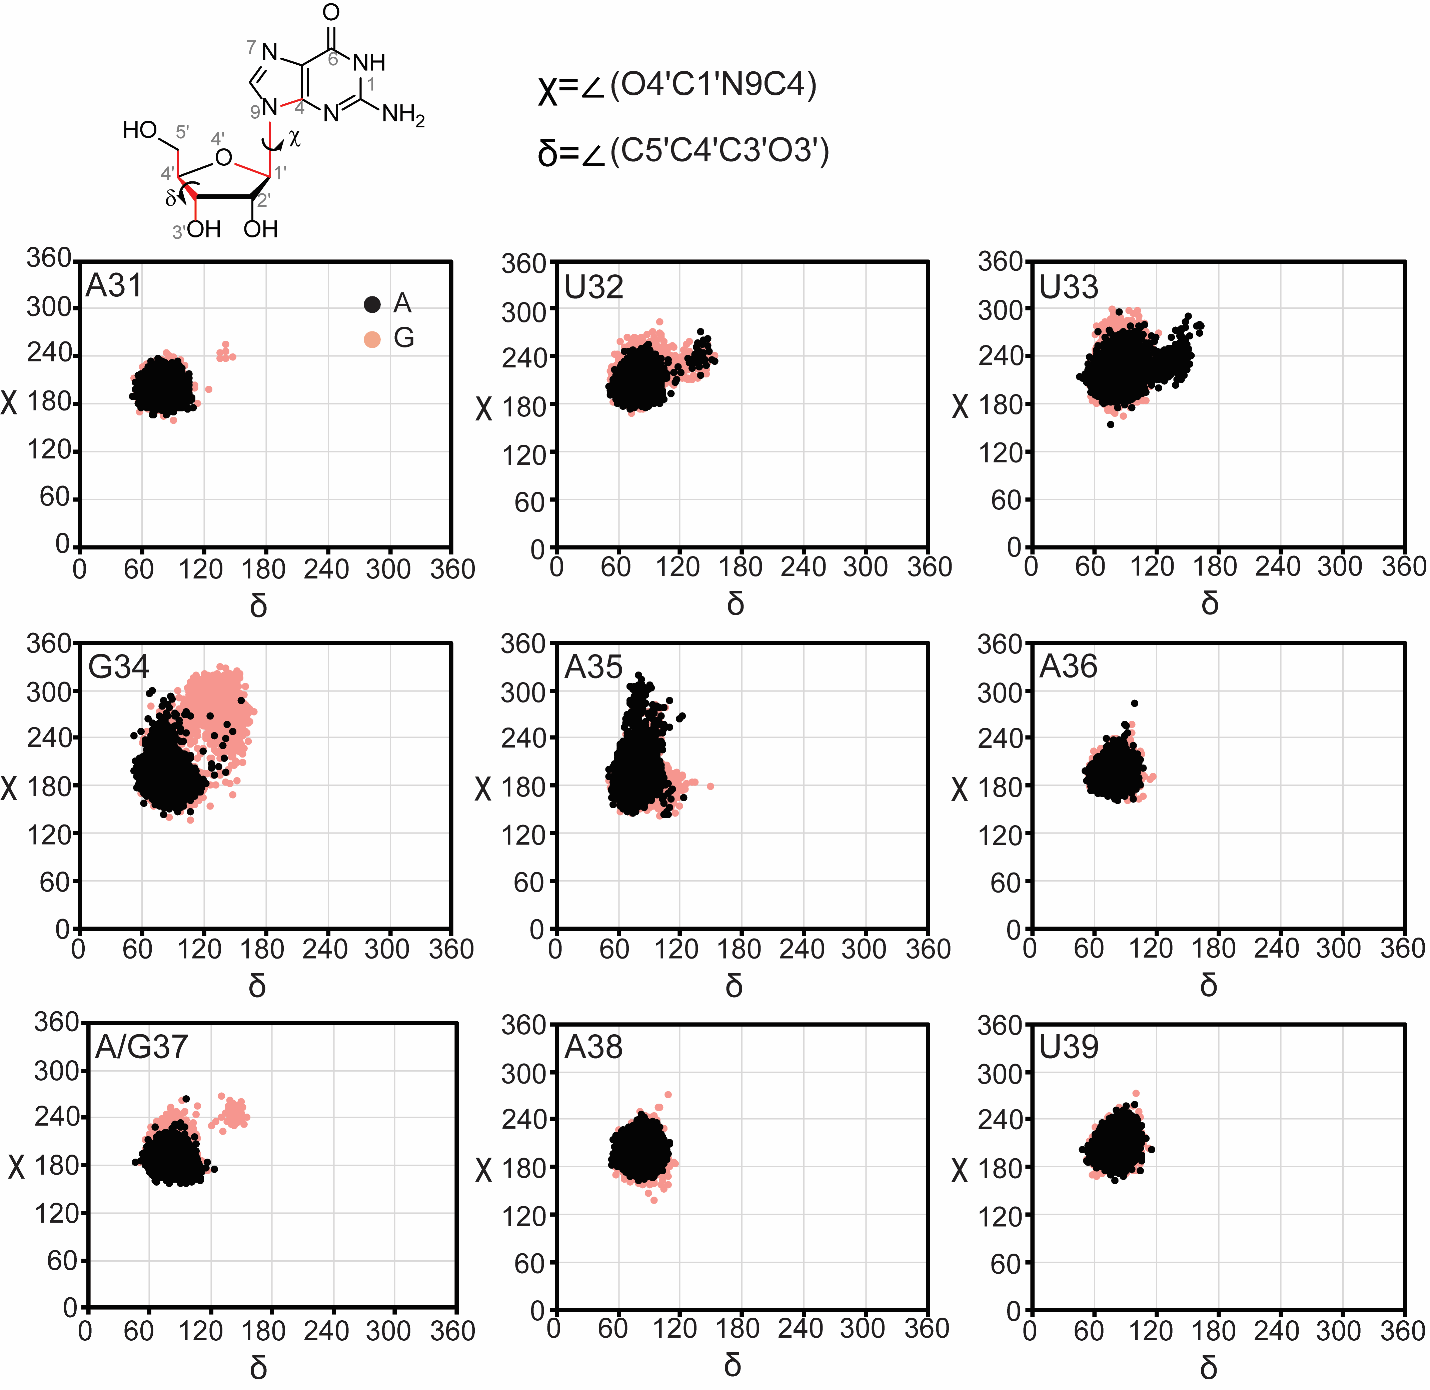


Figure S4. Distribution in the χ and δ pseudo backbone torsional angles in the anticodon loop nucleotides for the unmodified A (black) and G-tRNA (light red) in *E. coli* over MD simulations.


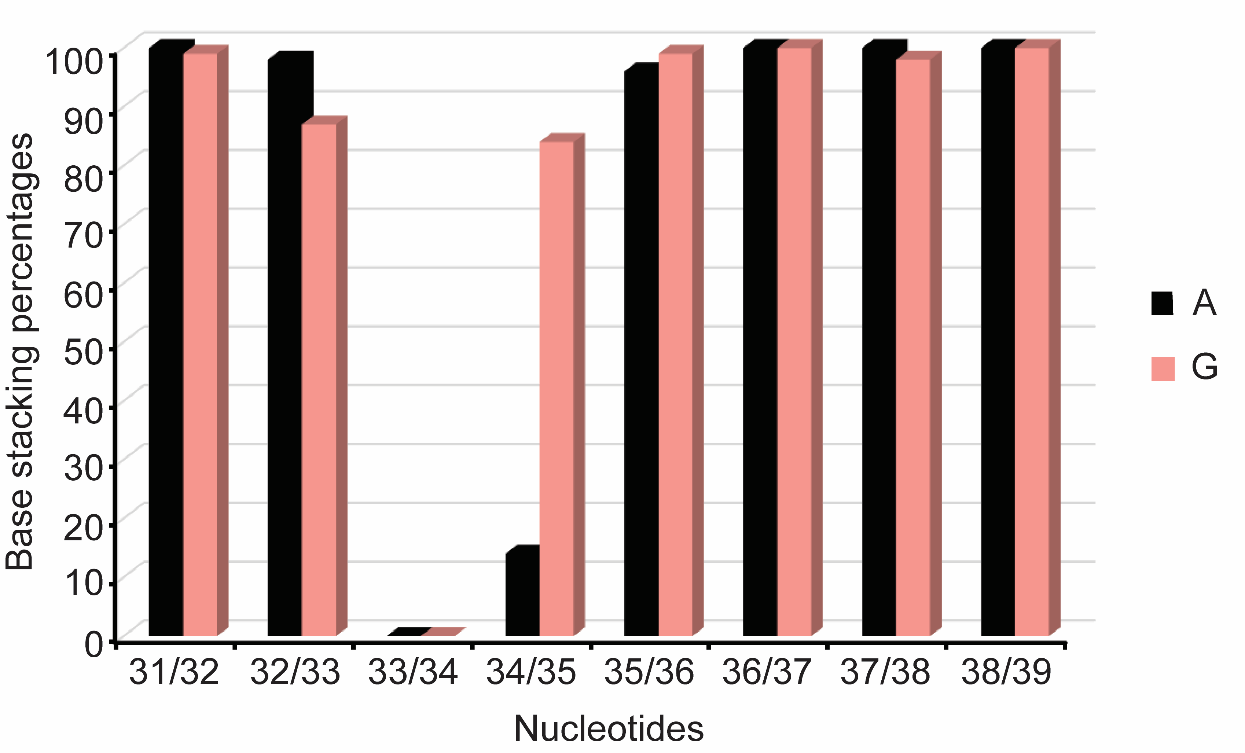


Figure S5. Base stacking percentages between neighboring nucleotides in the anticodon loop for unmodified A (black) and G-tRNA (light red) in *E. coli* over MD simulations.


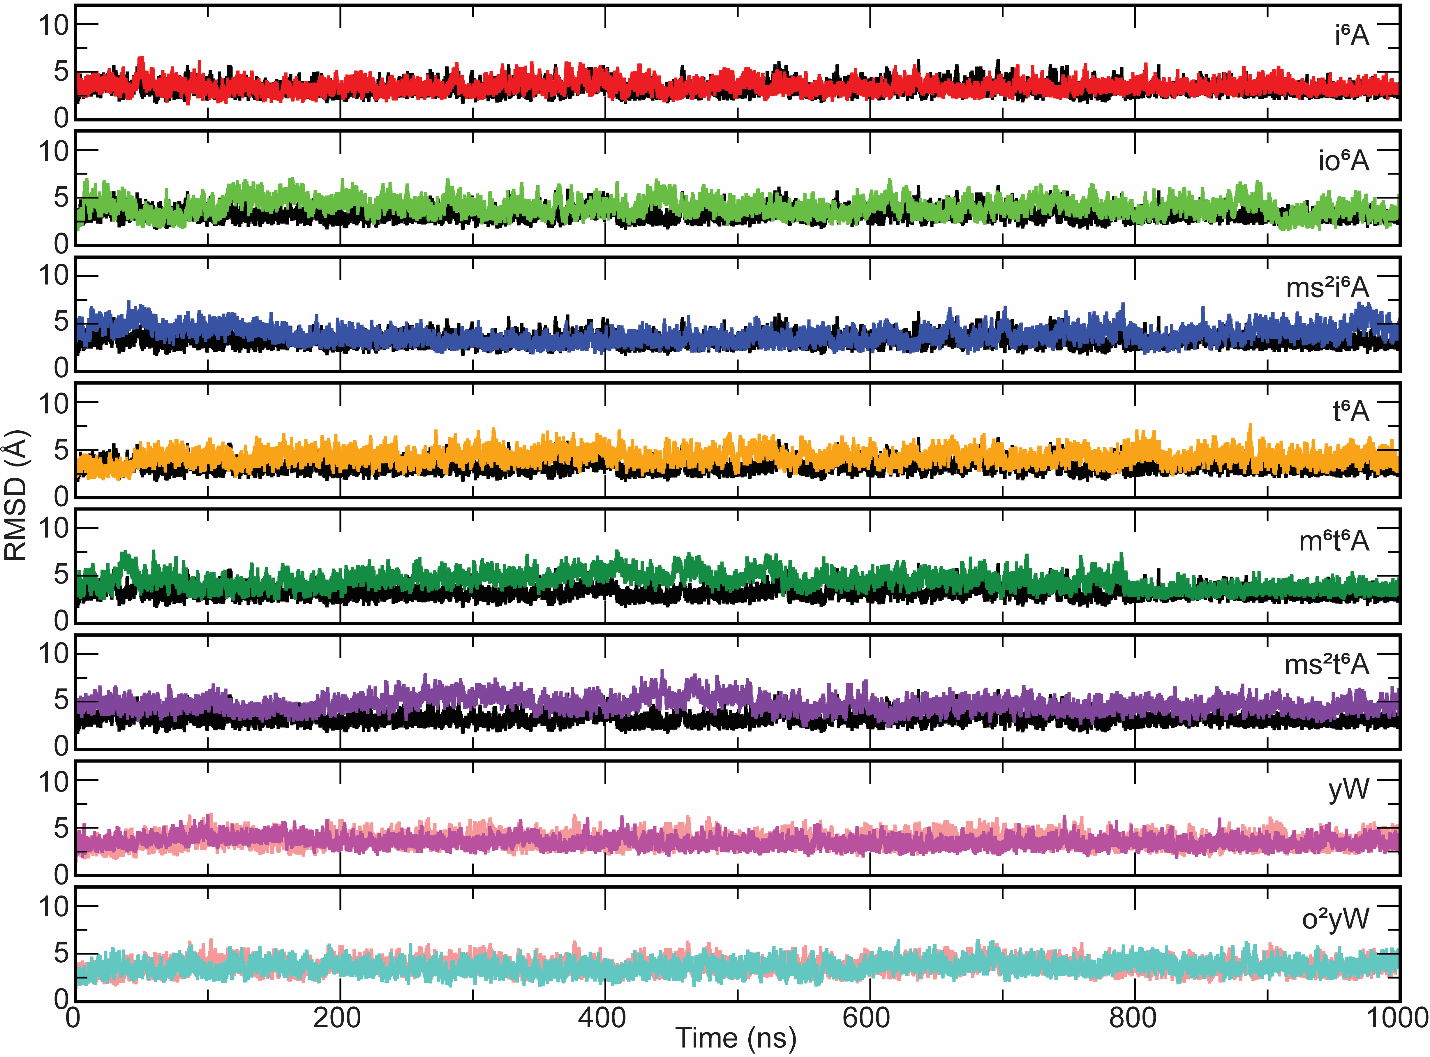


Figure S6. Comparison of backbone root-mean-square deviation (RMSD, Å) for modified and respective unmodified *E. coli* tRNA (A-tRNA in black and G-tRNA in light red) over the MD simulations.


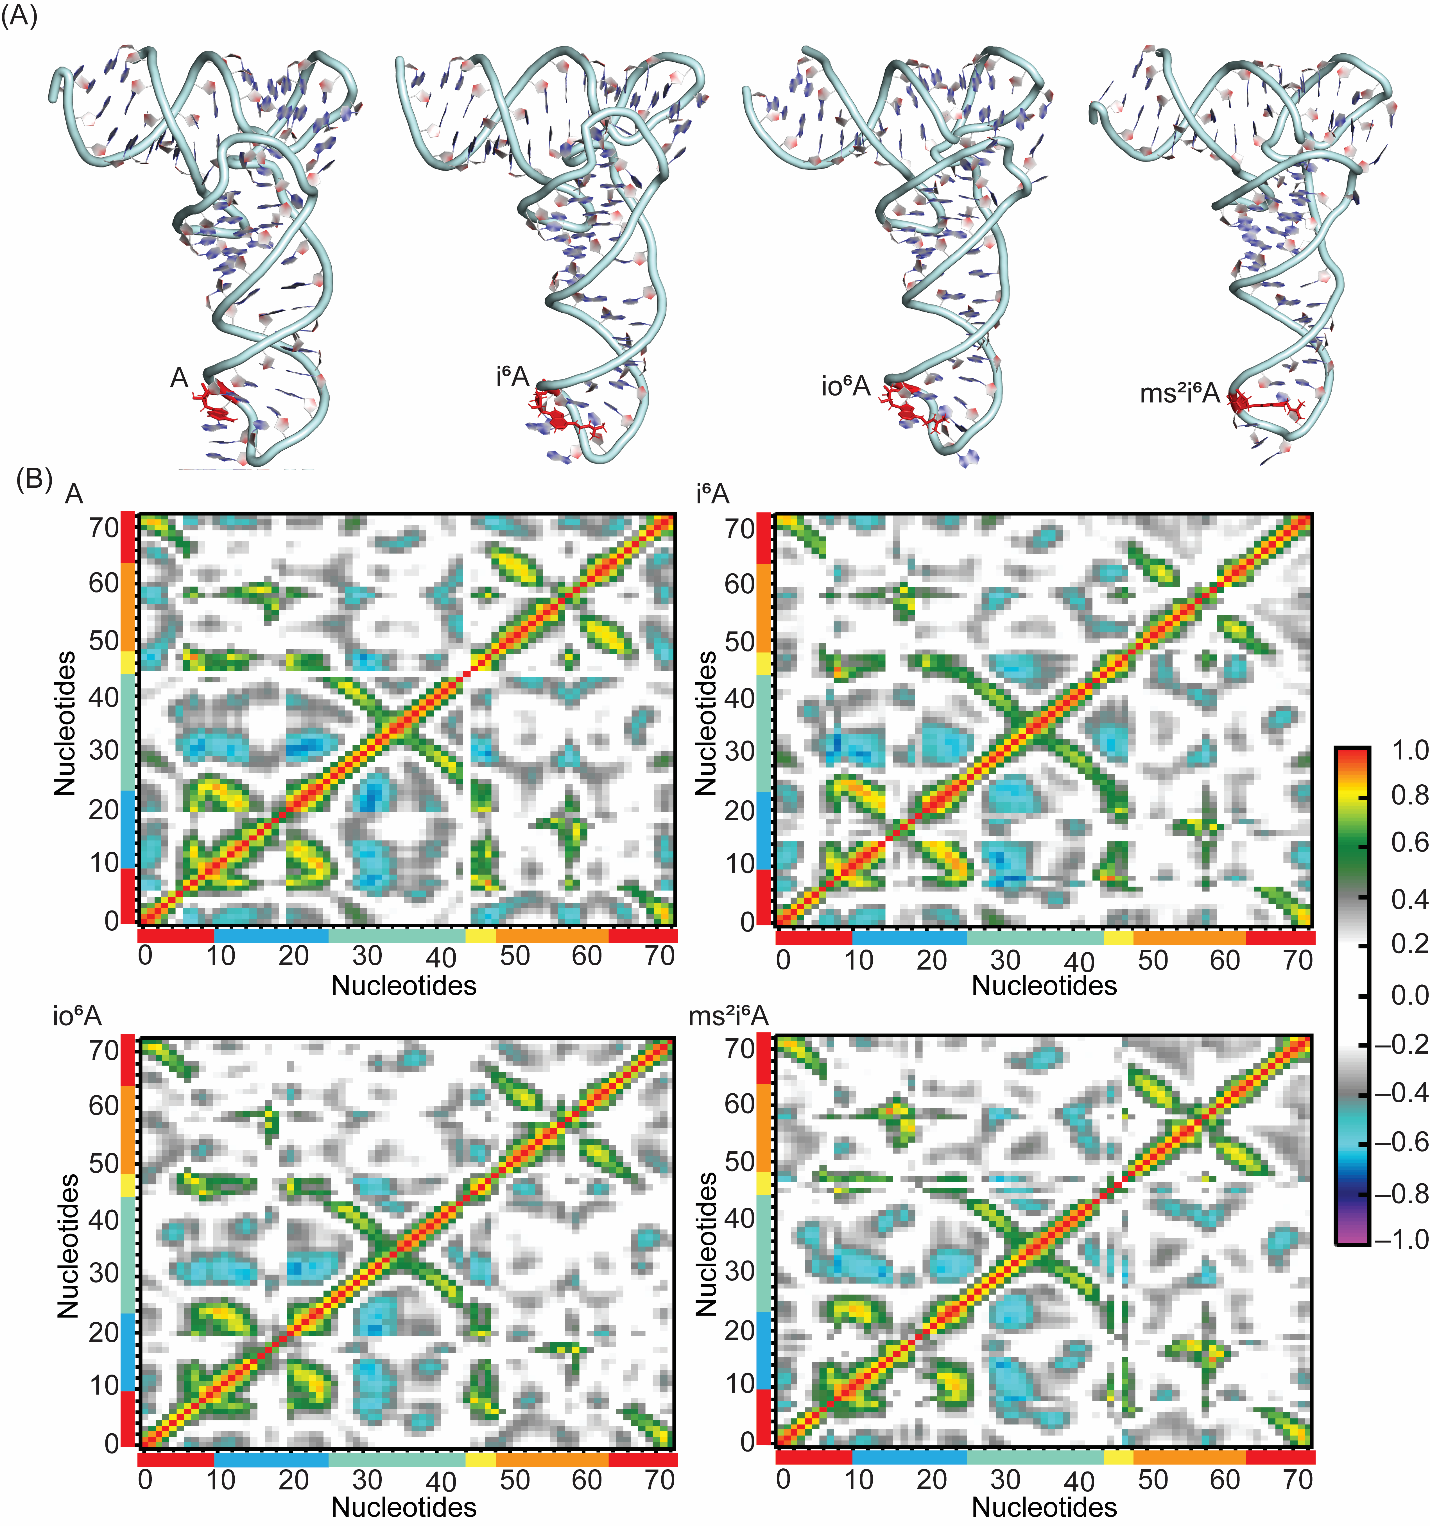


Figure S7. (A) MD representative structures of native and i6A-modified *E. coli* tRNA, with base 37 highlighted in red. (B) Dynamic cross-correlation maps for C1′ atoms in unmodified and i6A-modified tRNAs over the MD simulations. The axial color band corresponds to different helical domains in tRNA (red–ACS; blue–DSL; green–ASL; yellow–variable arm; orange–TSL).


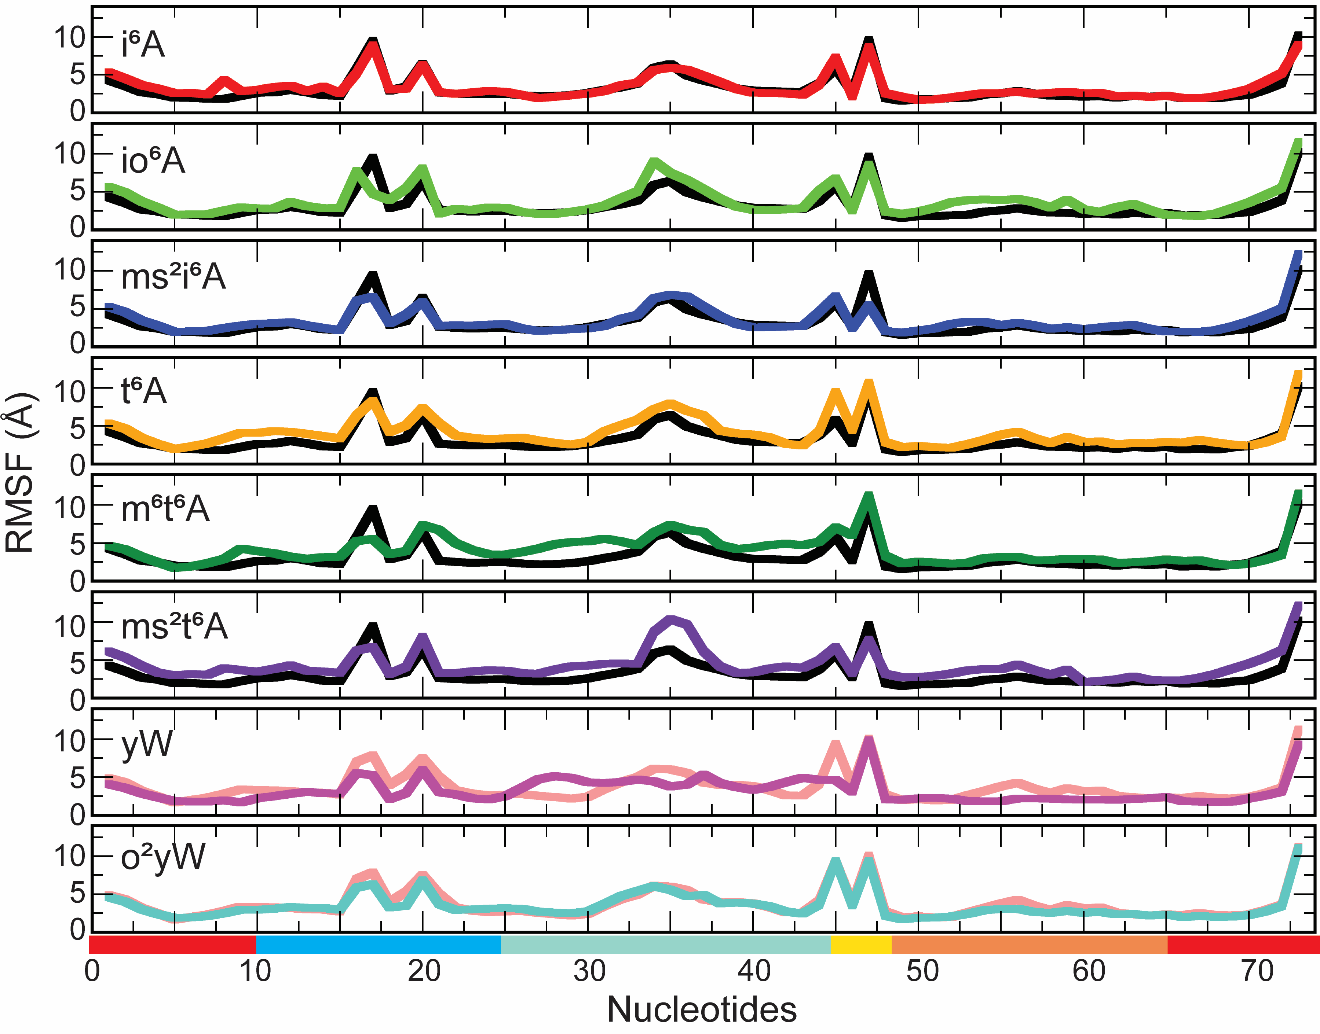


Figure S8. Comparison of average root-mean-square fluctuation (RMSF, Å) for individual nucleotides in modified and respective unmodified *E. coli* tRNA (A-tRNA in black and G-tRNA in light red) over the MD simulations.


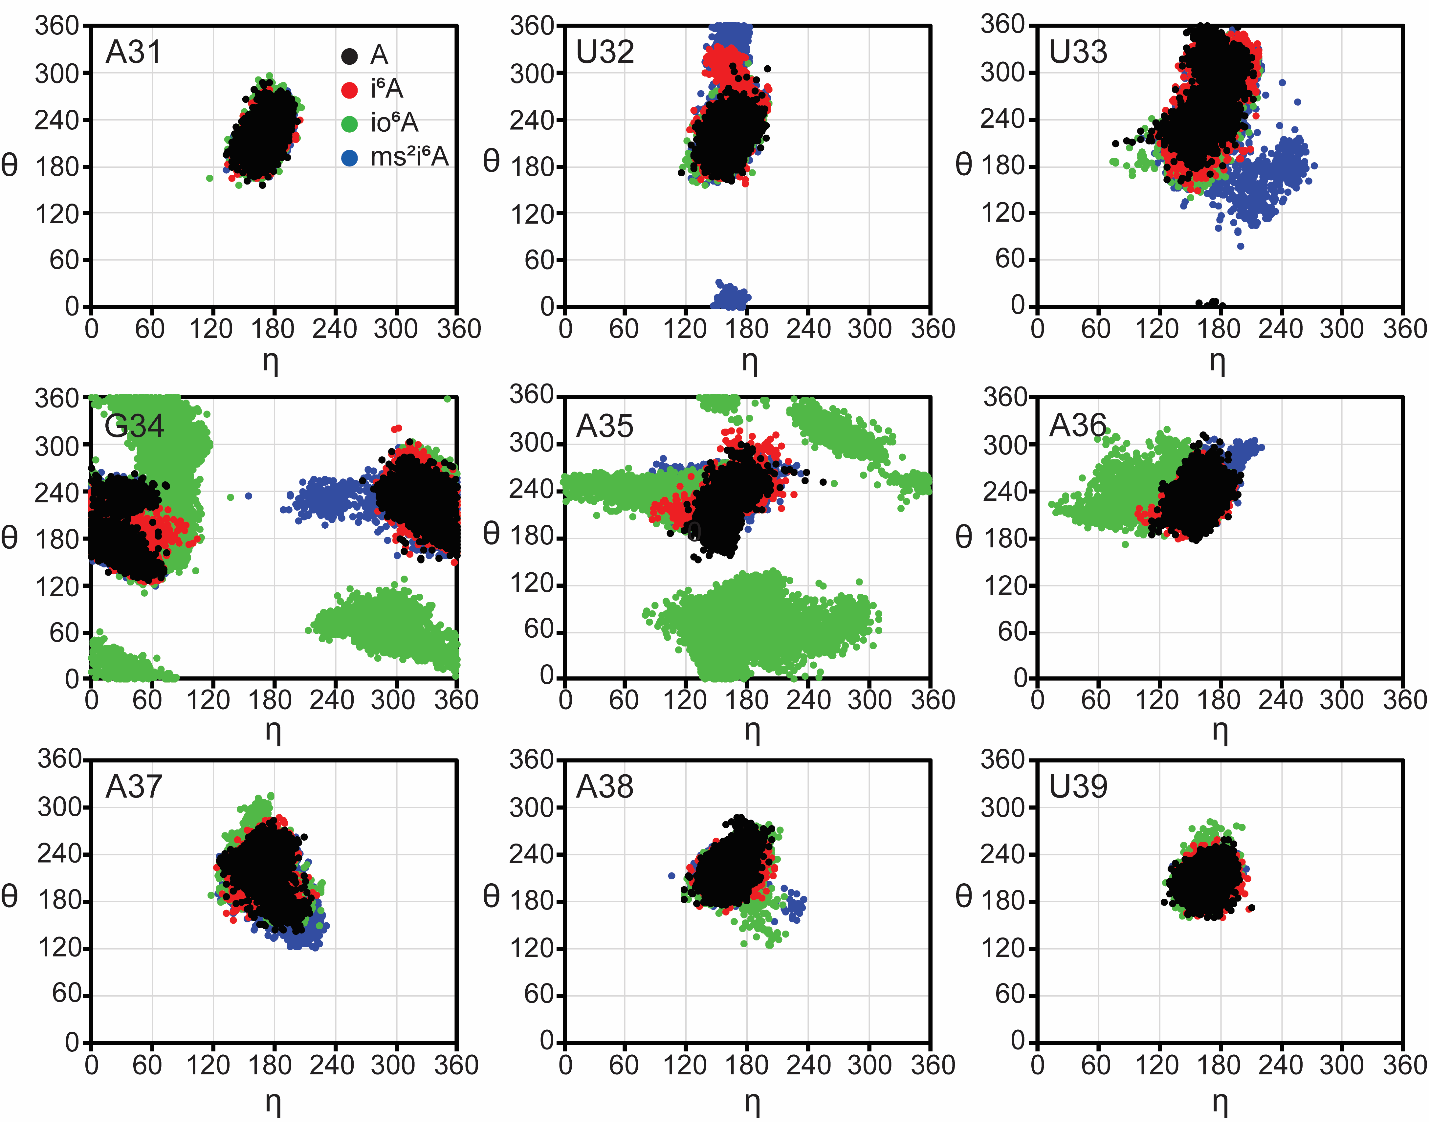


Figure S9. Distribution in the θ and η pseudo backbone torsional angles in the anticodon loop nucleotides for the unmodified (black) and i6A-modified *E. coli* tRNA (colored) over MD simulations.


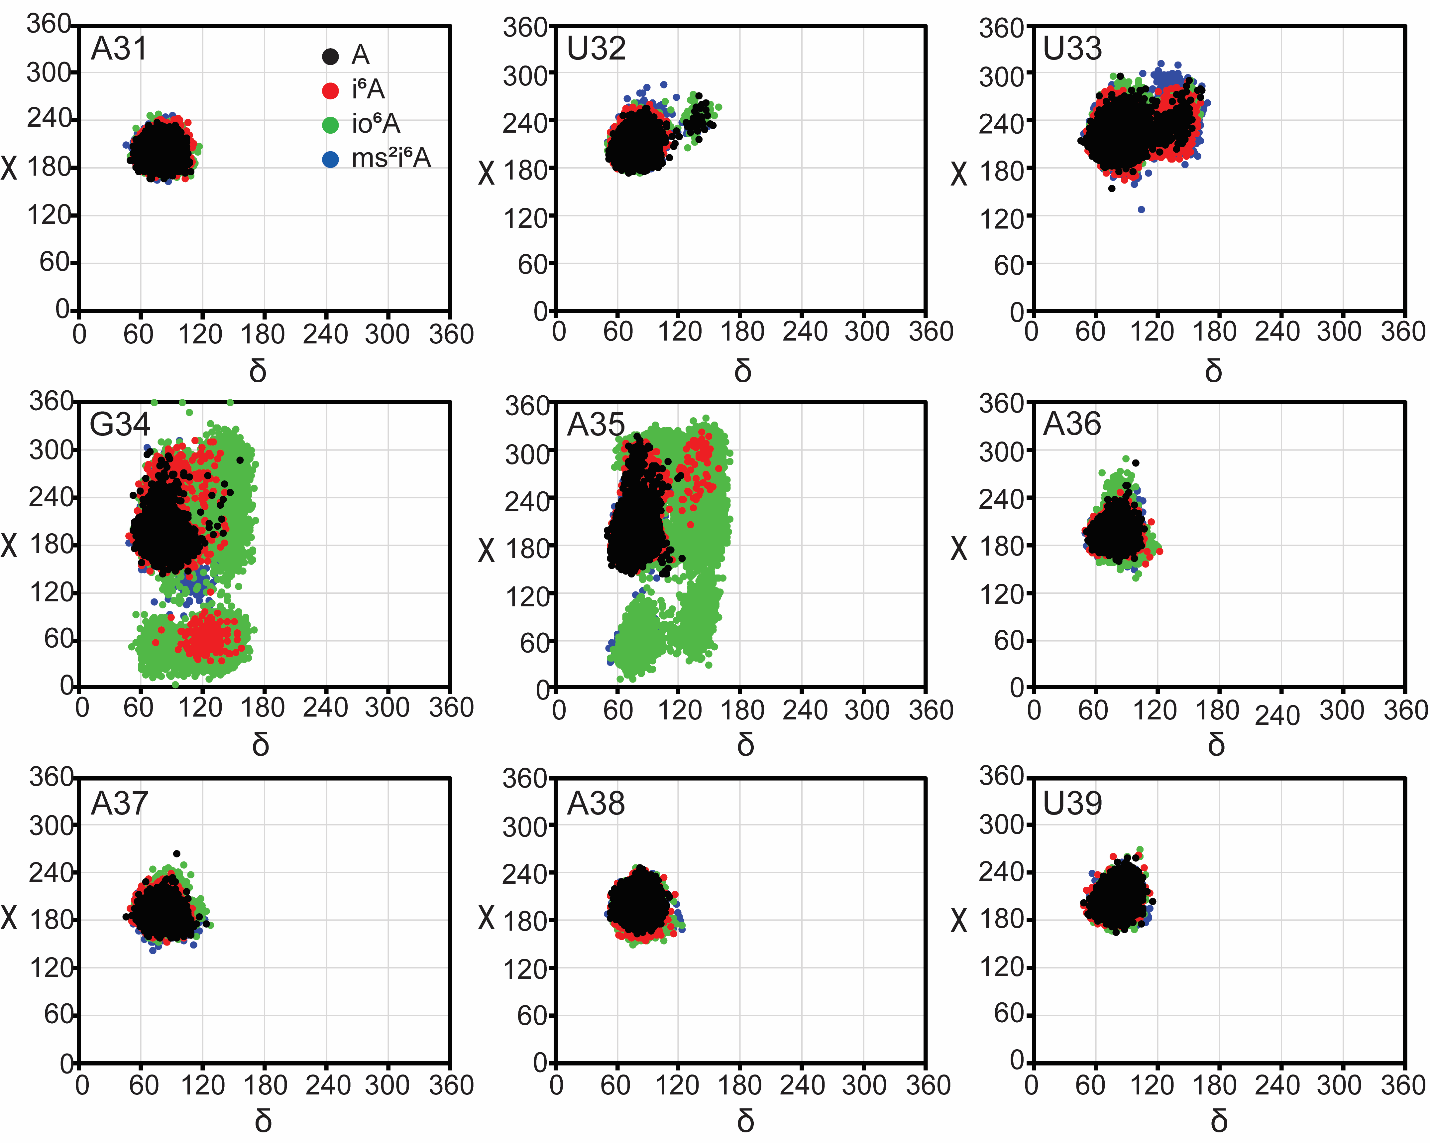


Figure S10. Distribution in the χ and δ torsional angles in the anticodon loop nucleotides for the unmodified A (black) and i6A-modified *E. coli* tRNAs (colored) over MD simulations.


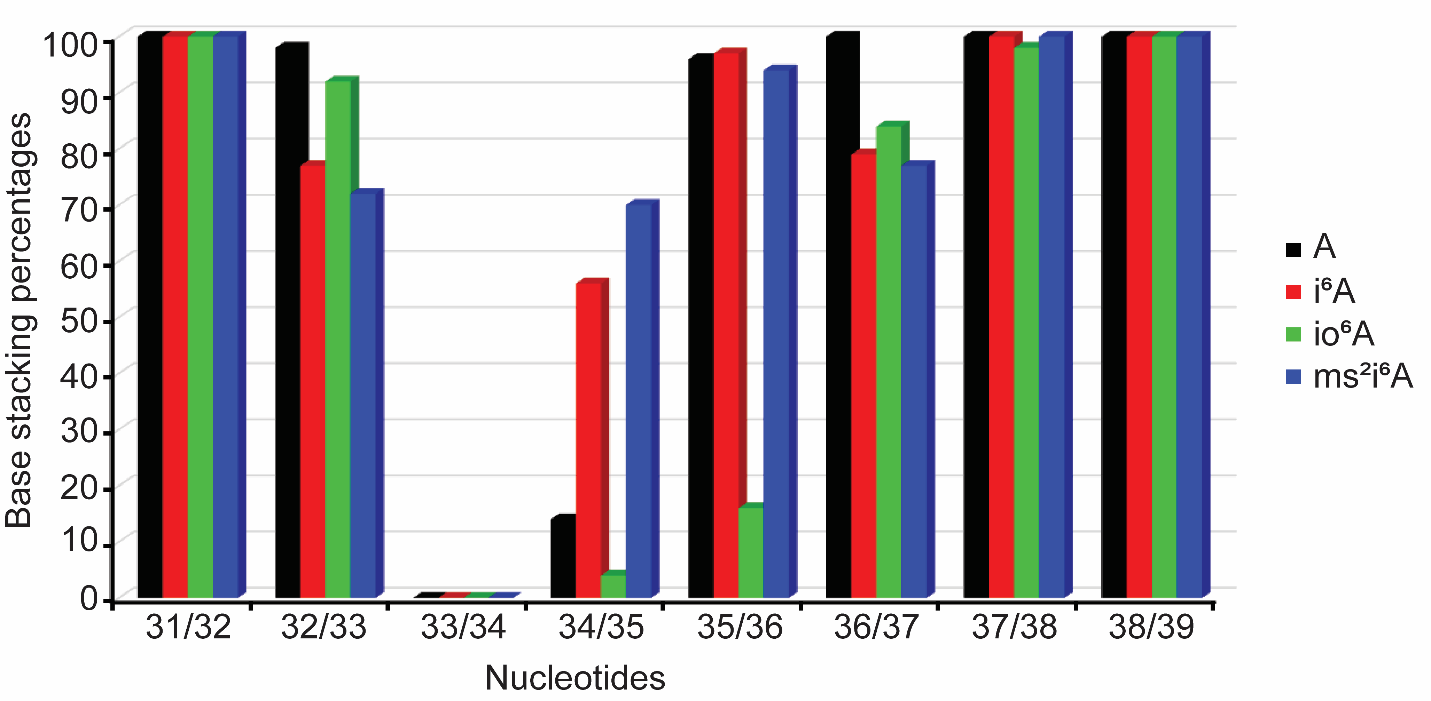


Figure S11. Base stacking percentages between neighboring nucleotides in the anticodon loop for unmodified A (black) and i6A-modified *E. coli* tRNAs (colored) over MD simulations.


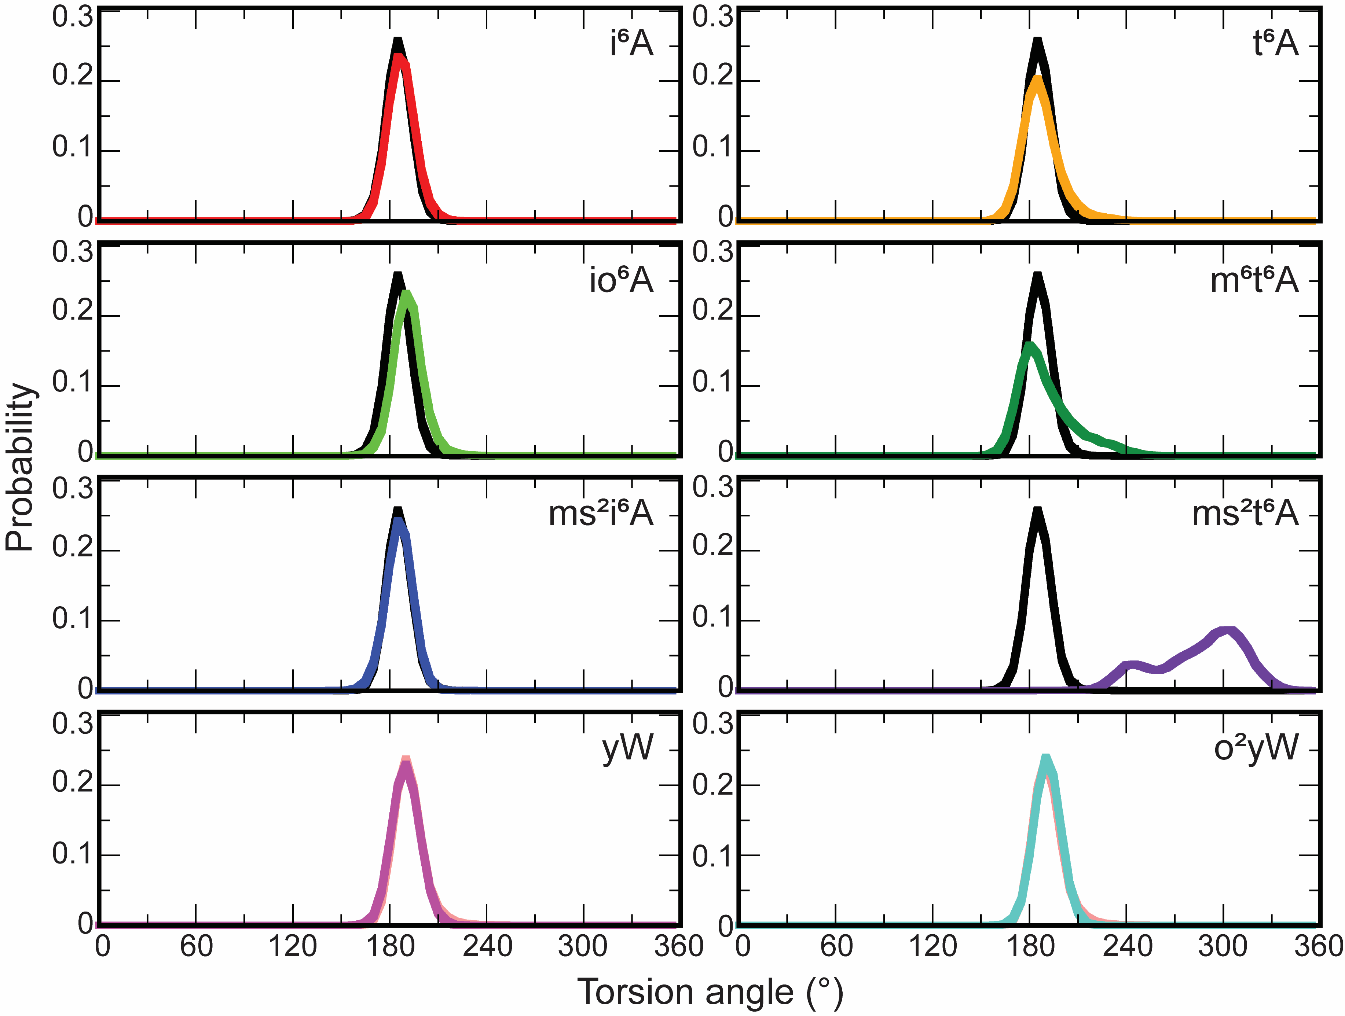


Figure S12. Probability distribution in the χ torsional angle ((O4′C1′N9C4),°) for the 37th nucleotide in unmodified (A-tRNA in black and G-tRNA in light red) and modified (colored) *E. coli* tRNAs over the MD simulations.


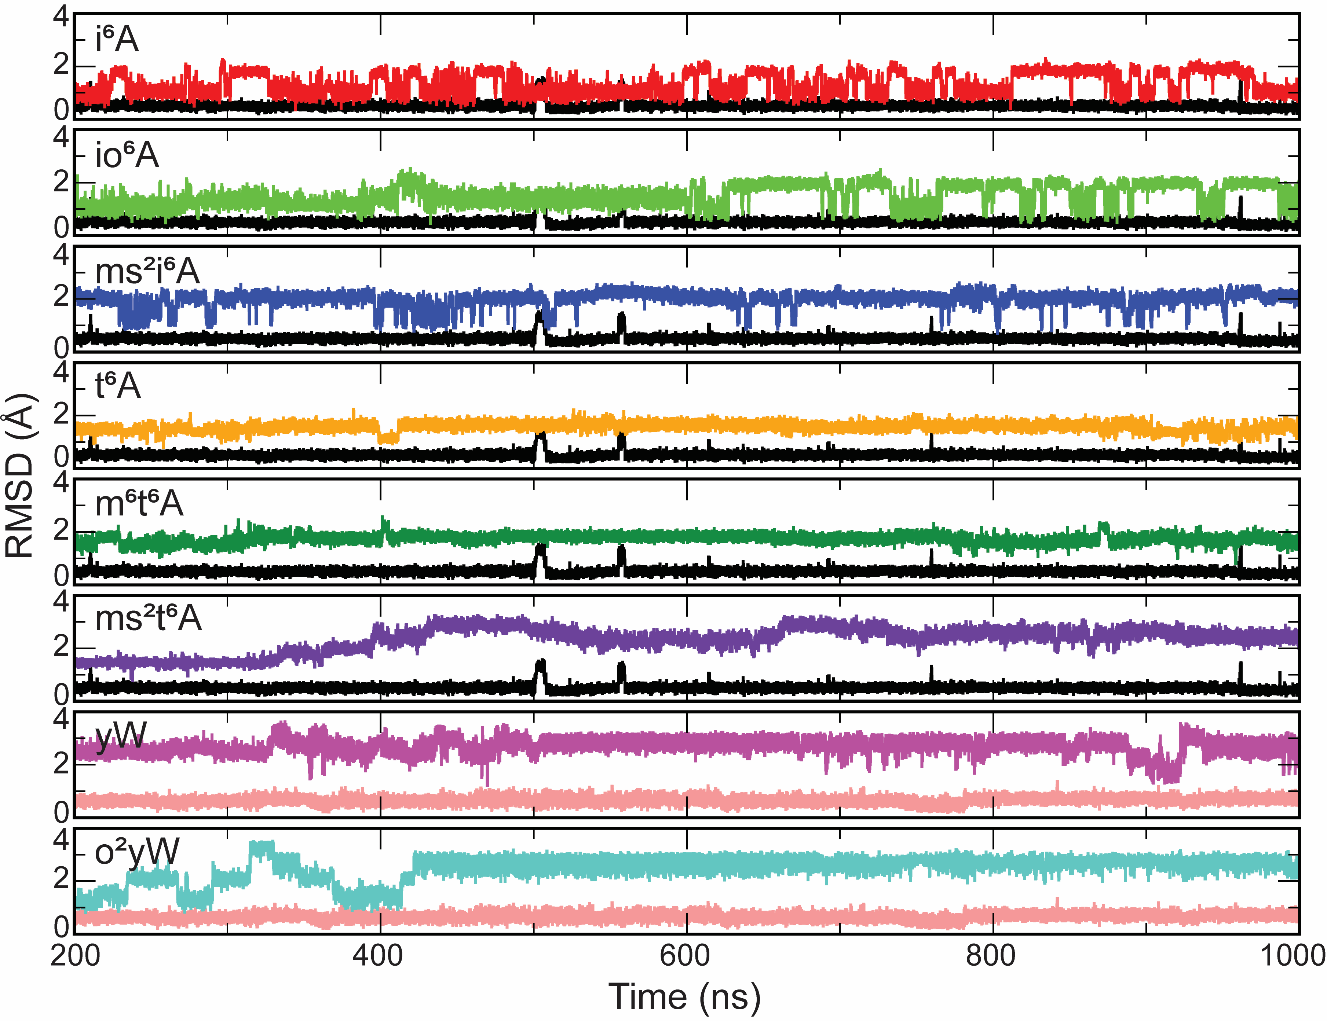


Figure S13. Comparison of structural deviation (RMSD, Å) of base 37 in modified and respective unmodified *E. coli* tRNA systems (A–tRNA, black; G–tRNA, light red) over the MD simulations.


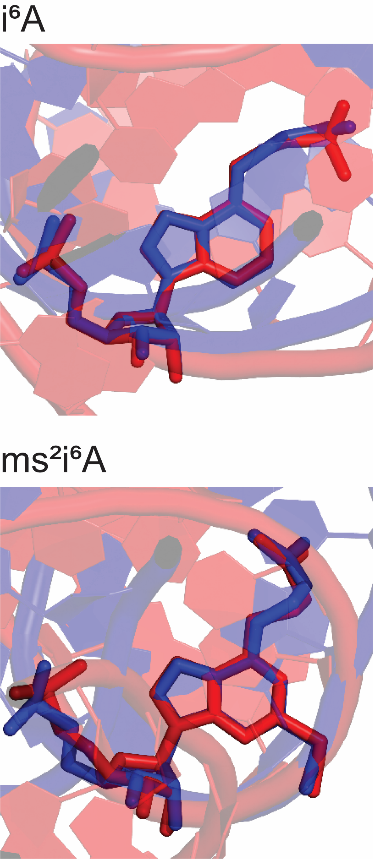


Figure S14: Overlay of MD representative structure (blue) and crystal structure (red) for i6A (PDB ID: 5LZB) and ms2i6A-modified *E. coli* tRNA (PDB ID: 4V6F), highlighting the adoption of the crystal structure orientation during MD simulations.


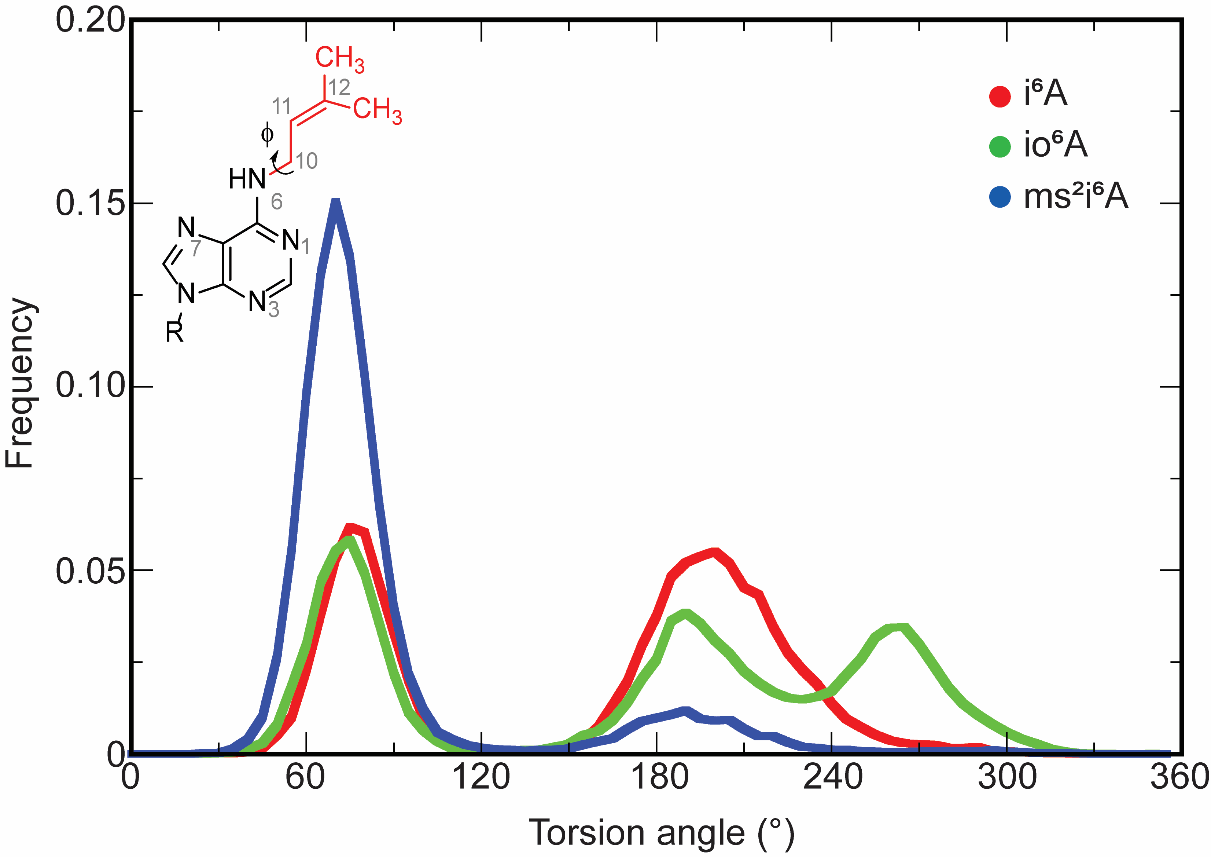


Figure S15. Distribution in hypermodification side chain conformations as a function of the dihedral angle  ((C6N6C10C11)) for i6A-modified *E. coli* tRNAs throughout the MD simulations.


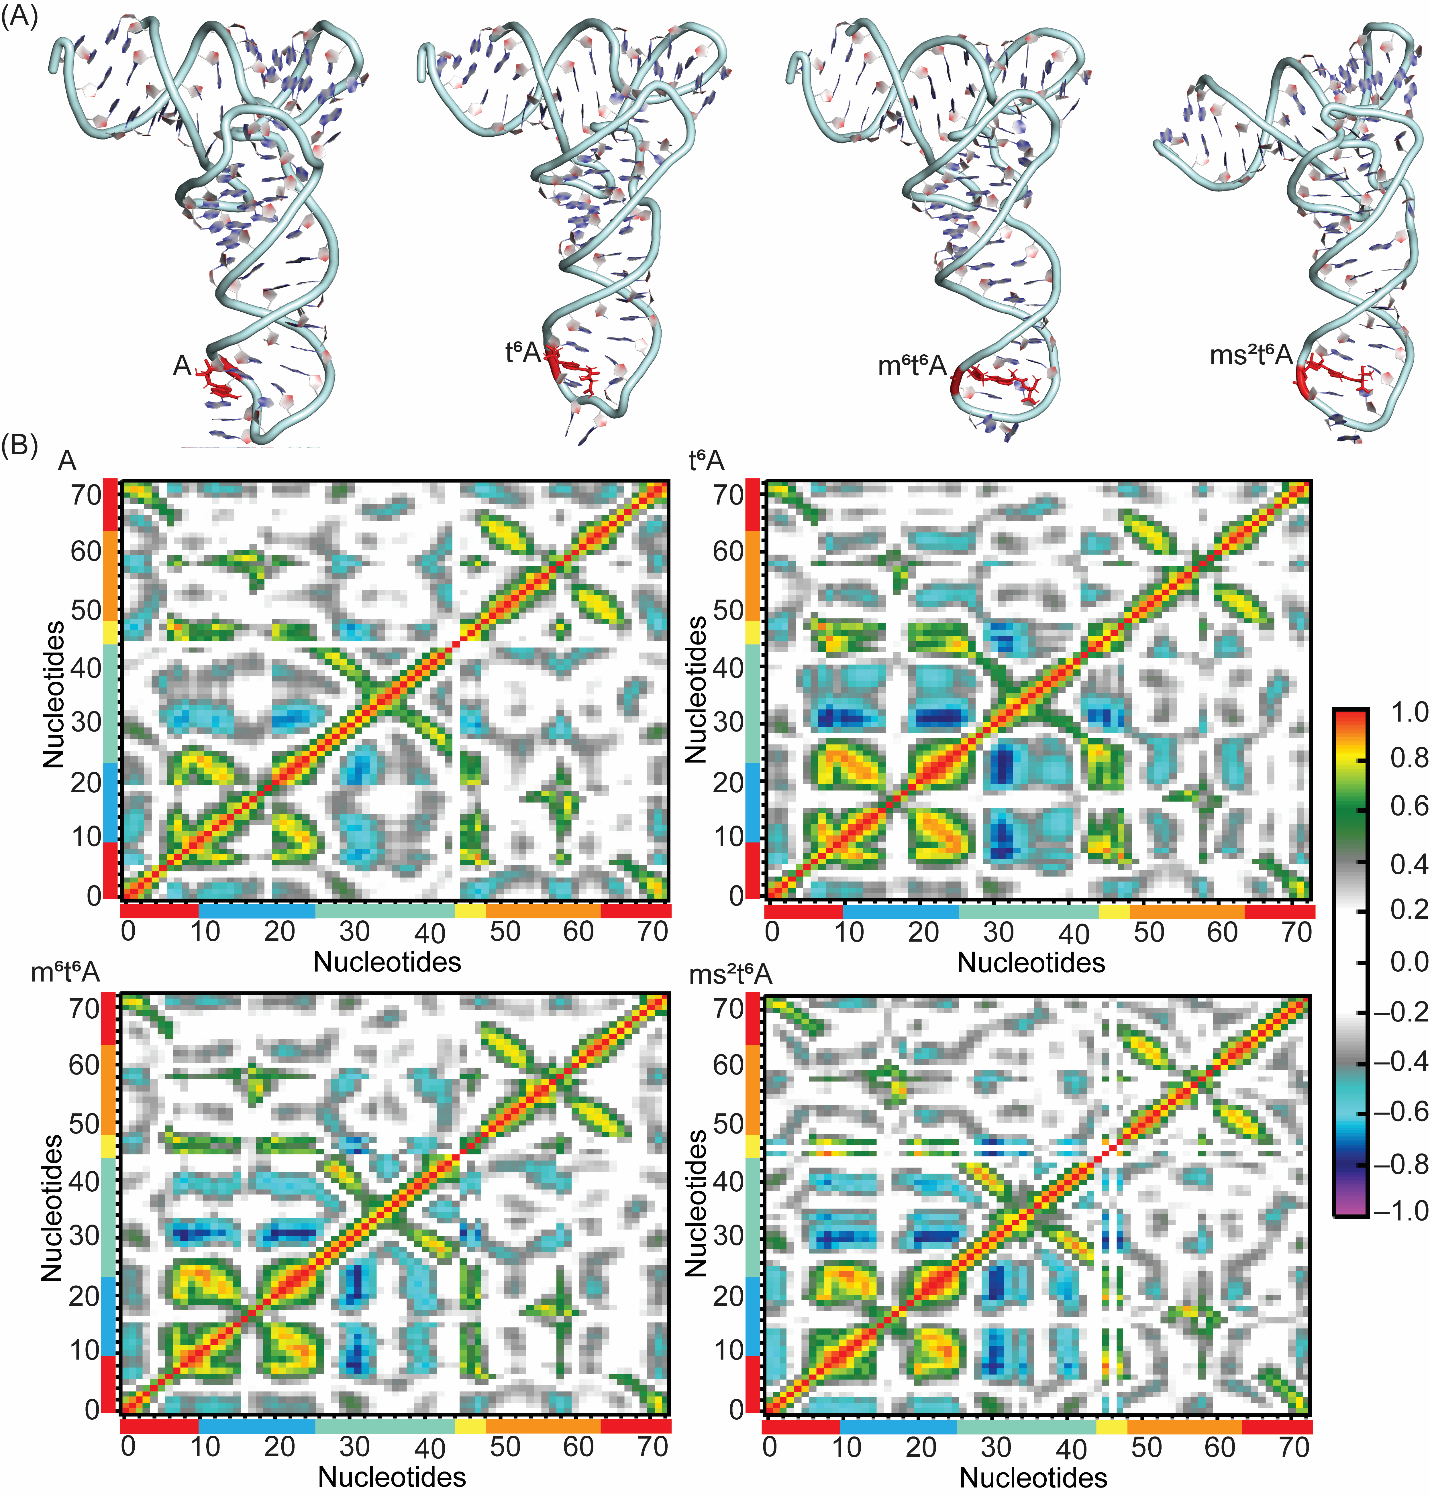


Figure S16. (A) MD representative structures of native A and t6A-modified *E. coli* tRNA, with base 37 highlighted in red. (B) Dynamic cross-correlation maps for C1′ atoms in unmodified and t6A-modified tRNAs over the MD simulations. The axial color band corresponds to different helical domains in tRNA (red–ACS; blue–DSL; green–ASL; yellow–variable arm; orange–TSL).


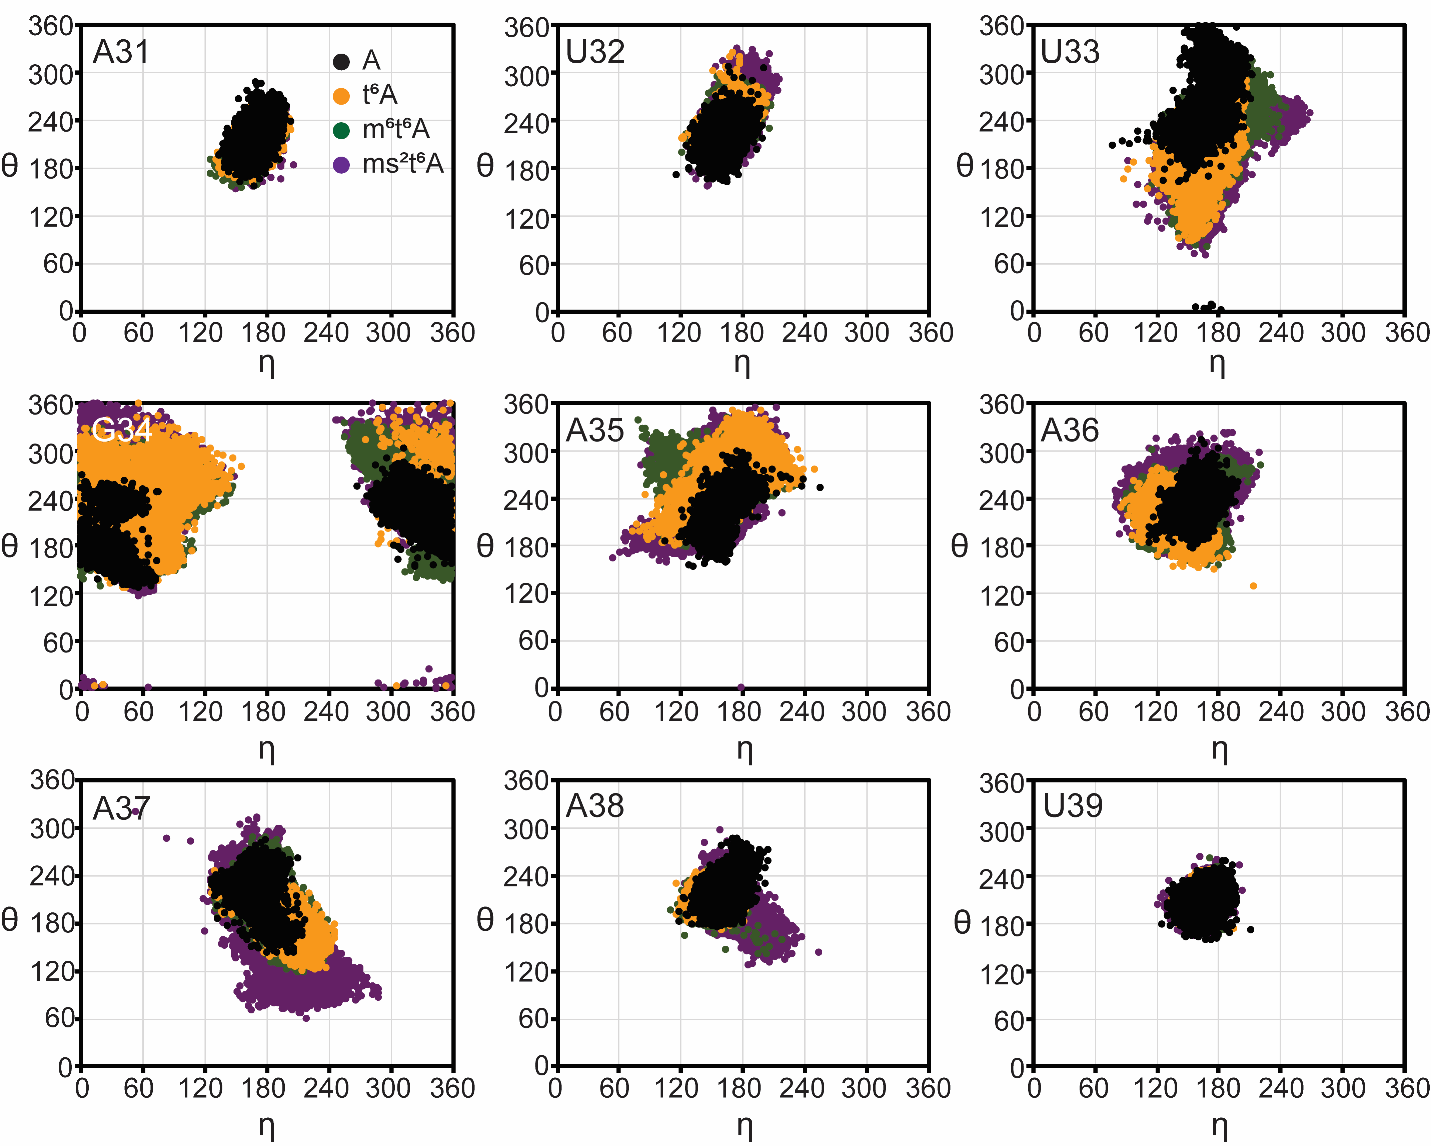


Figure S17. Distribution in the θ and η pseudo backbone torsional angles in the anticodon loop nucleotides for the unmodified (black) and t6A-modified *E. coli* tRNA (colored) over MD simulations.


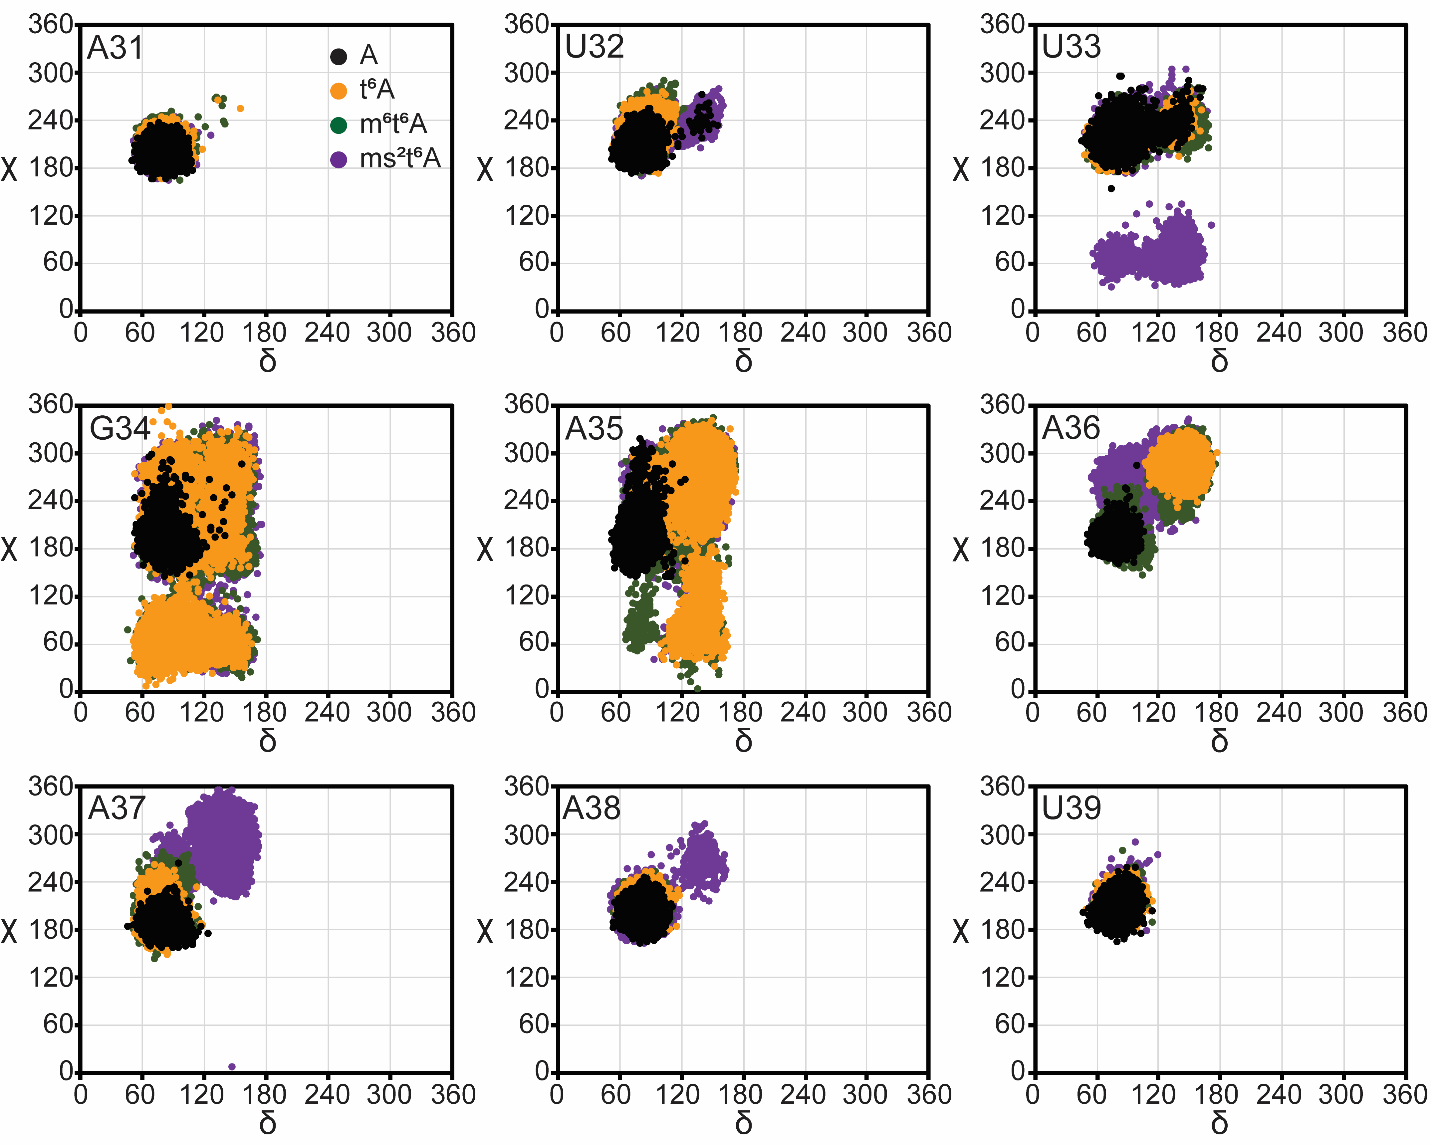


Figure S18. Distribution in the χ and δ torsional angles in the anticodon loop nucleotides for the unmodified A (black) and t6A-modified *E. coli* tRNAs (colored) over MD simulations.


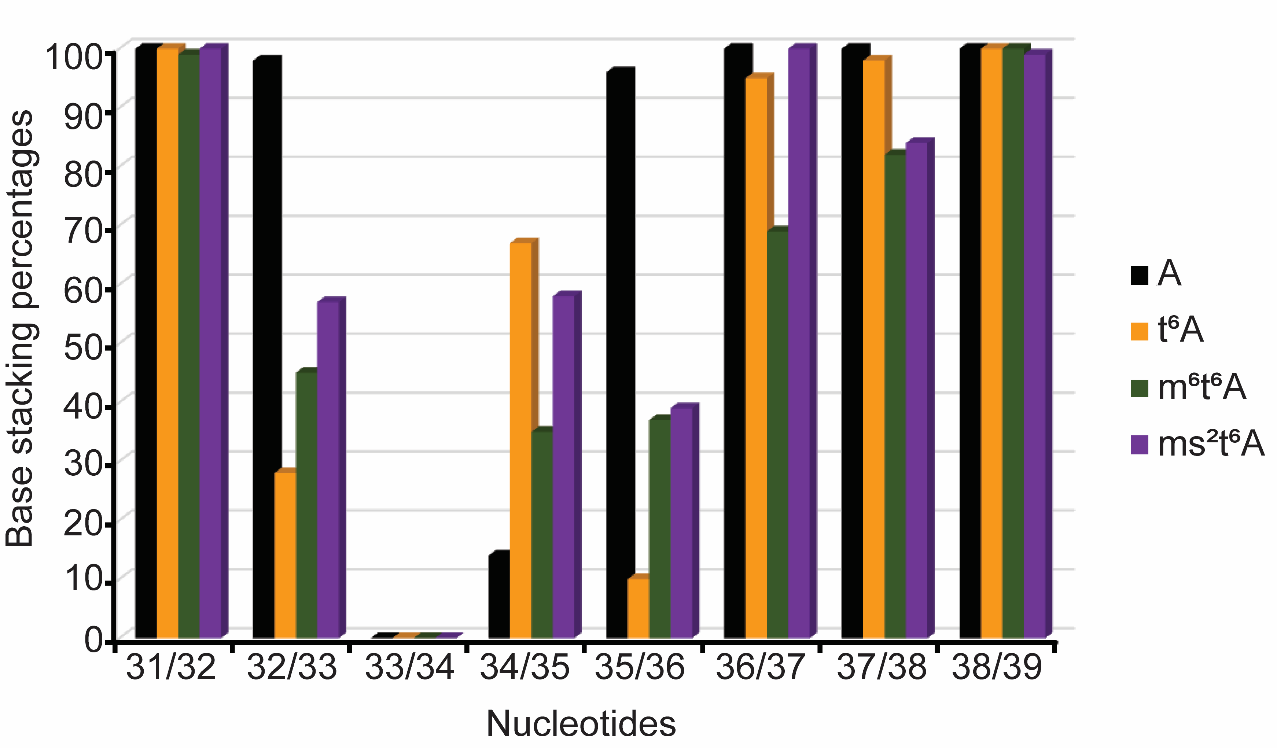


Figure S19. Base stacking percentages between neighboring nucleotides in the anticodon loop for unmodified A (black) and t6A-modified *E. coli* tRNAs (colored) over MD simulations.


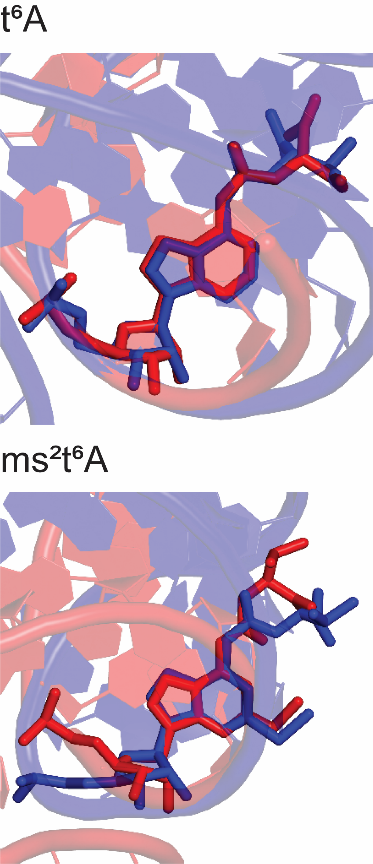


Figure S20. Overlay of MD representative structure (blue) and crystal structure (red) for t6A (PDB ID: 1XMO) and ms2t6A-modified *E. coli* tRNA (PDB ID: 1FIR), highlighting the adoption of the crystal structure orientation during MD simulations.


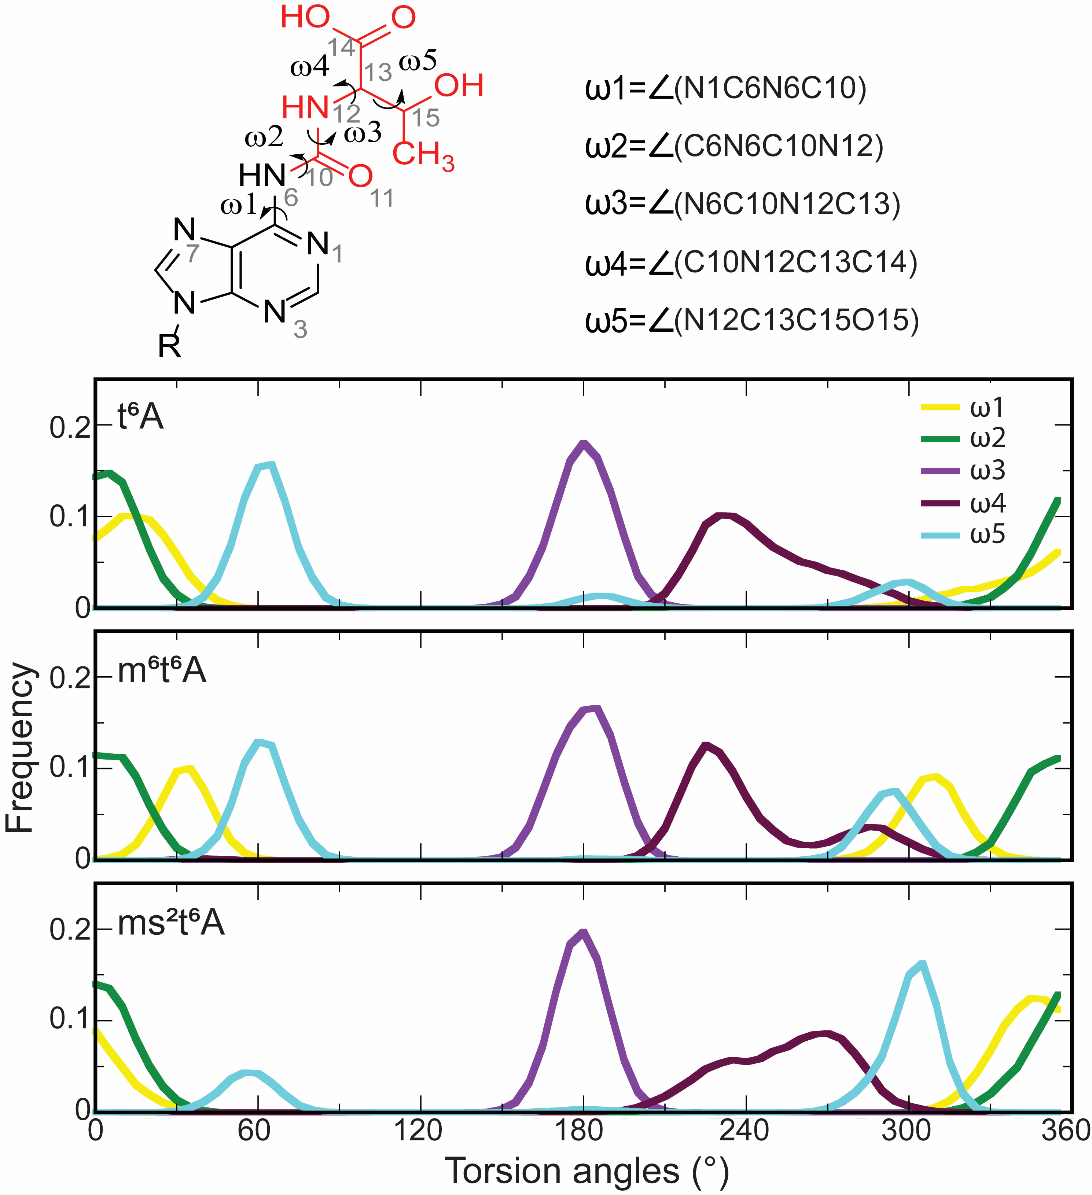


Figure S21. Distribution in hypermodification side chain conformations as a function of the dihedral angles 1 – 5 for t6A-modified *E. coli* tRNAs throughout the MD simulations.


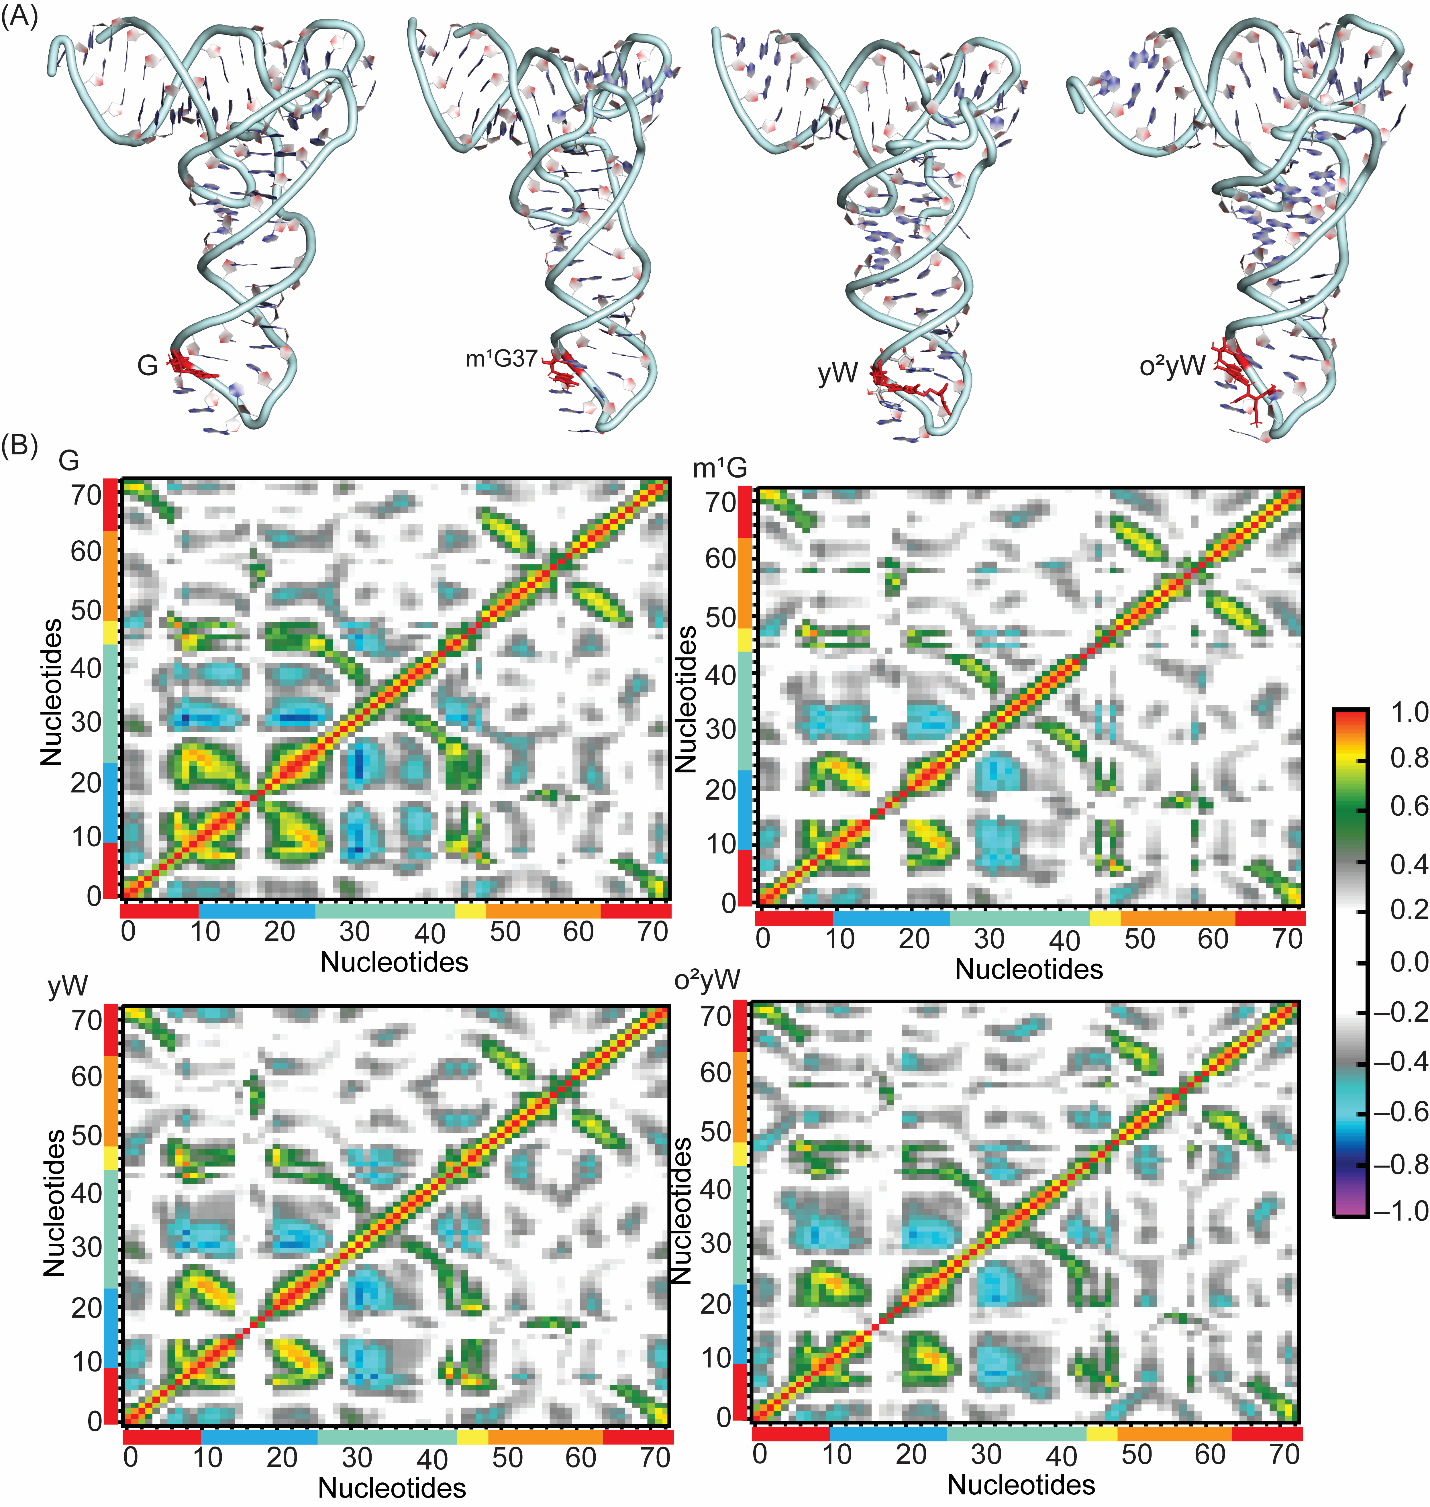


Figure S22. (A) MD representative structures of native G, m1G and yW-modified *E. coli* tRNA, with base 37 highlighted in red. (B) Dynamic cross-correlation maps for C1′ atoms in unmodified and yW-modified *E. coli* tRNAs over the MD simulations. The axial color band corresponds to different helical domains in tRNA (red–ACS; blue–DSL; green–ASL; yellow–variable arm; orange–TSL).


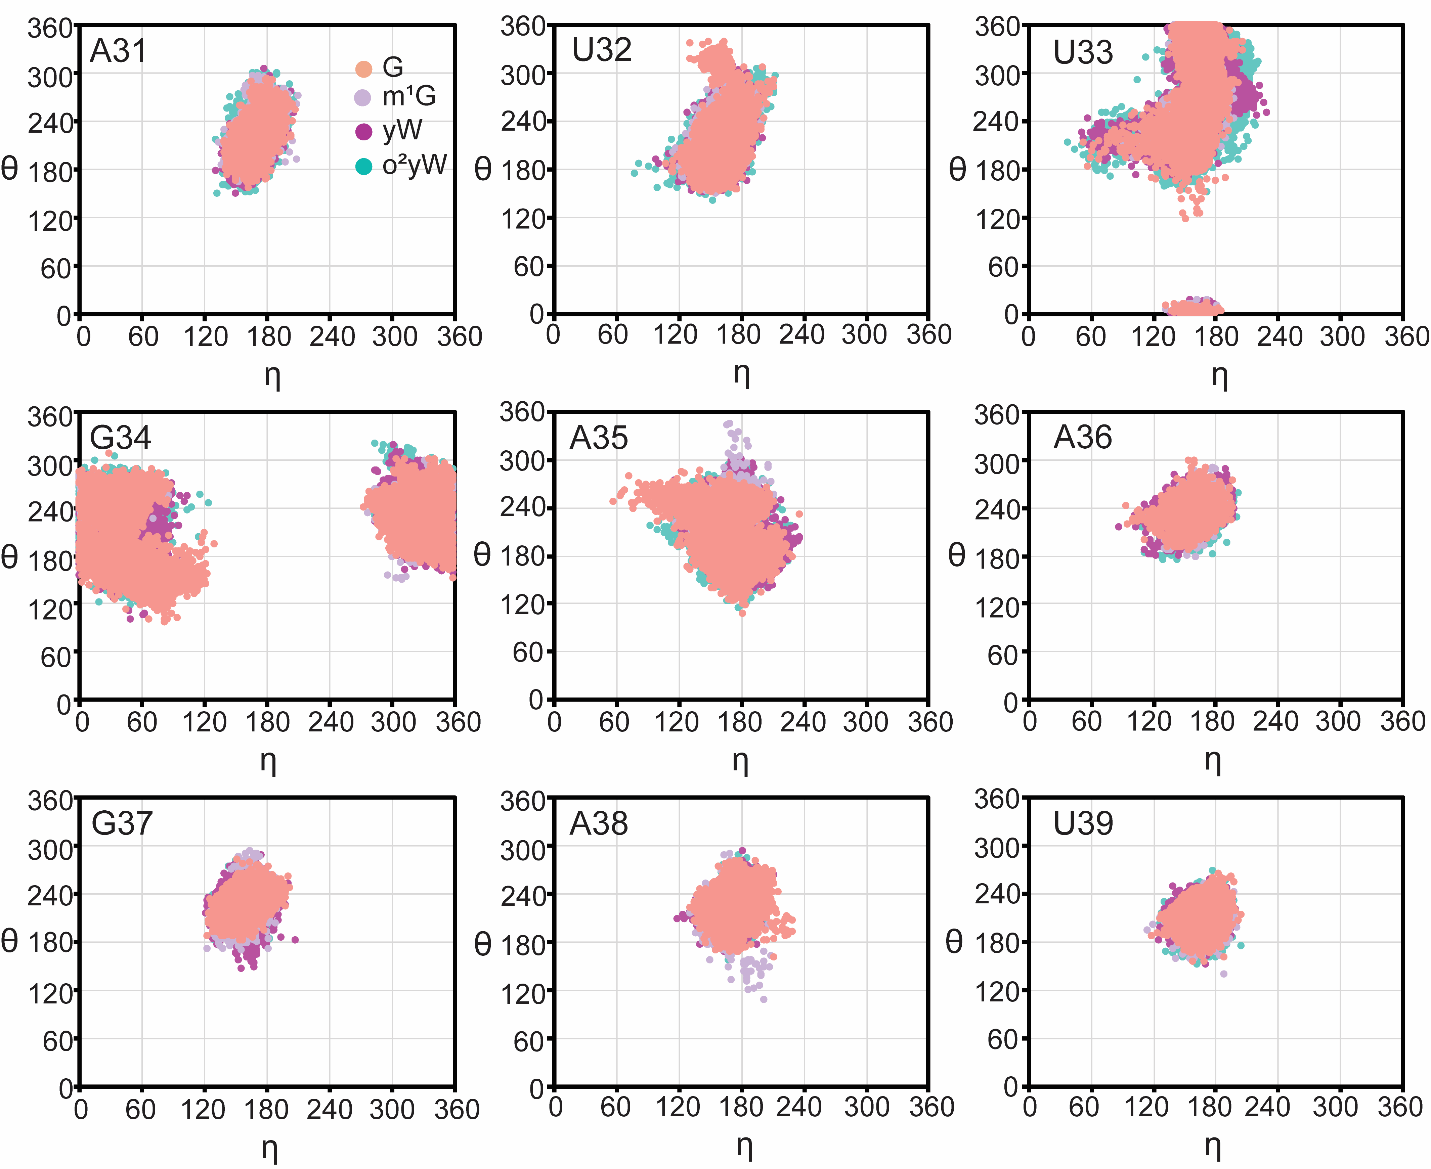


Figure S23. Distribution in the θ and η pseudo backbone torsional angles in the anticodon loop nucleotides for the unmodified G, m1G and yW-modified *E. coli* tRNA over MD simulations.


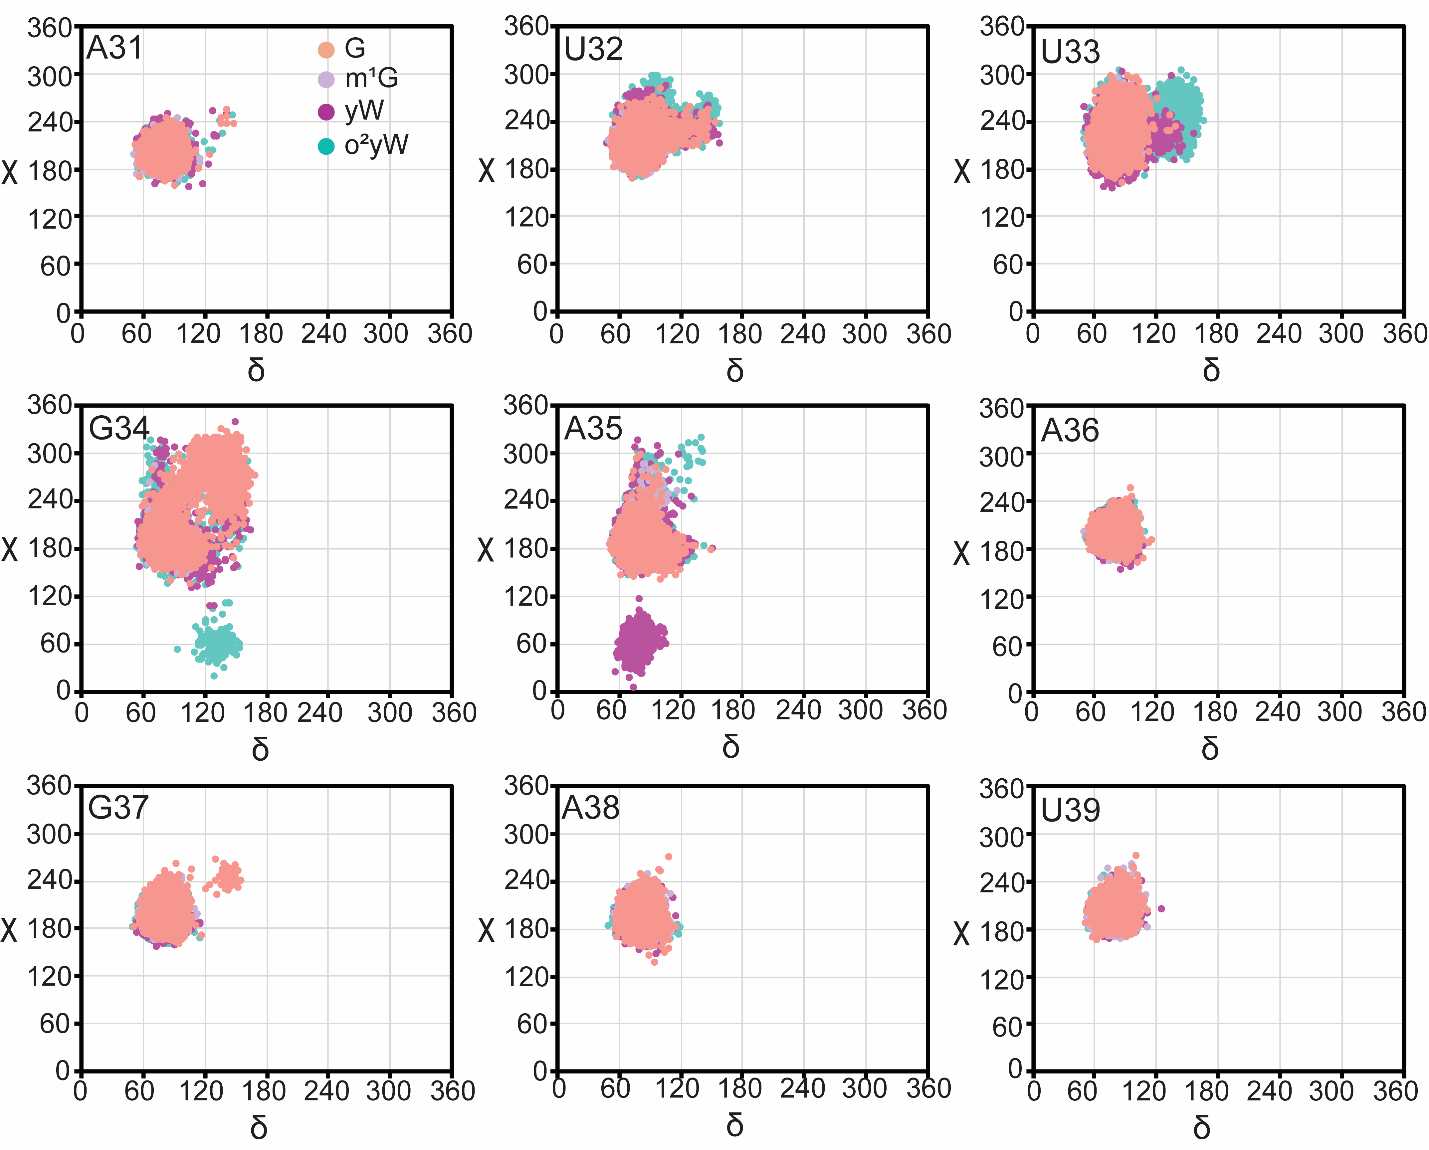


Figure S24. Distribution in the χ and δ torsional angles in the anticodon loop nucleotides for the unmodified G, m1G and yW-modified *E. coli* tRNA over MD simulations.

Figure S25. Base stacking percentages between neighboring nucleotides in the anticodon loop for unmodified G, m1G-tRNA and yW-modified *E. coli* tRNAs over MD simulations.

Figure S26: Overlay of MD representative structure (blue) and crystal structure (red) for yW-modified tRNA (PDB ID: 1I9V), highlighting the adoption of the crystal structure orientation during MD simulations in (A) *E. coli* and (B) yeast.


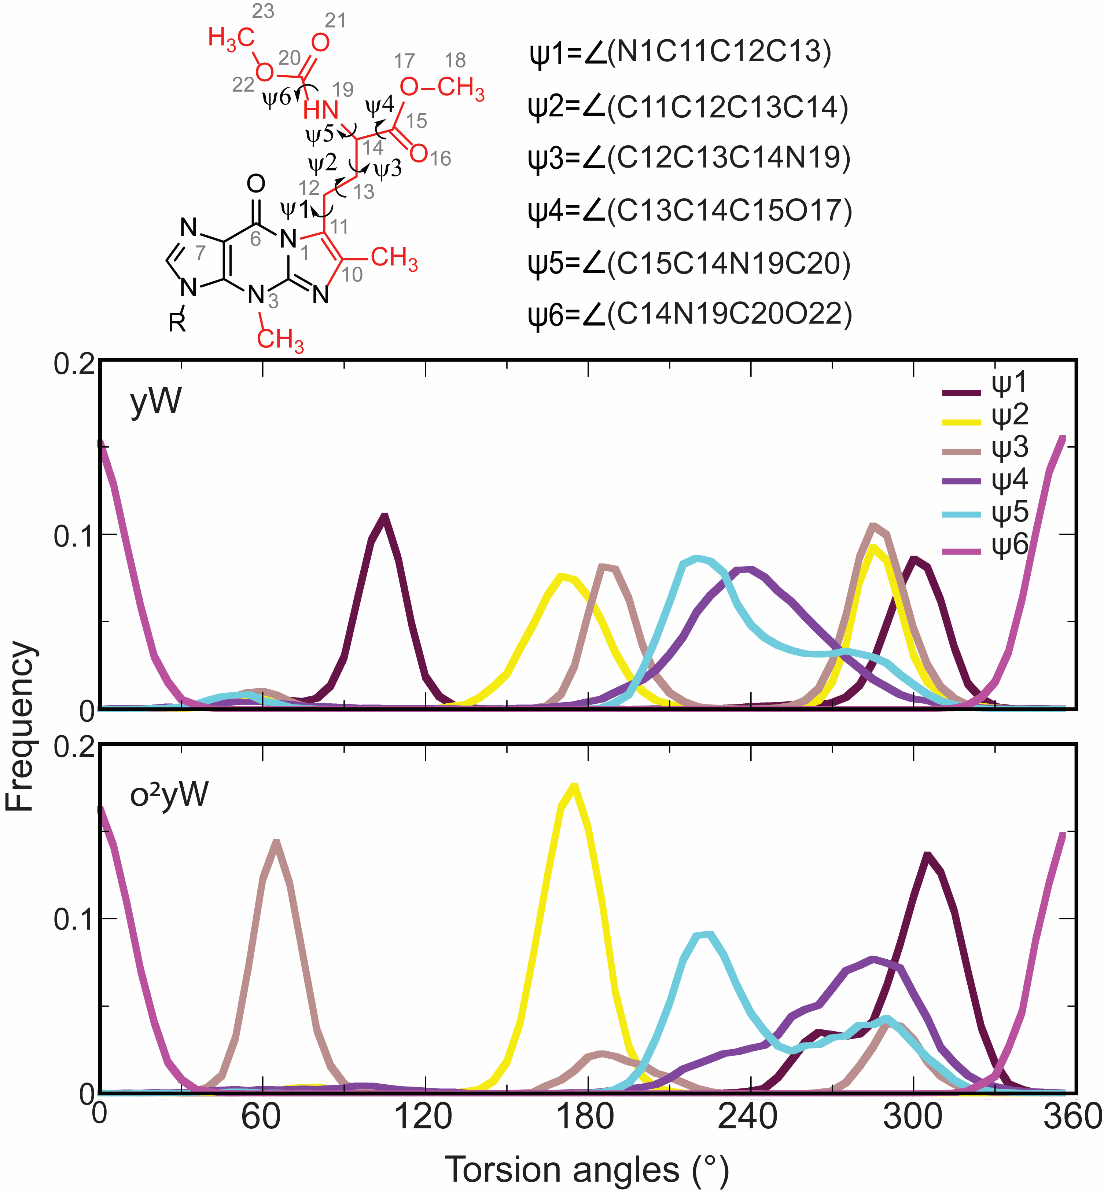


Figure S27. Distribution in hypermodification side chain conformations as a function of the dihedral angles 1 – 6 for yW-modified *E. coli* tRNAs throughout the MD simulations.


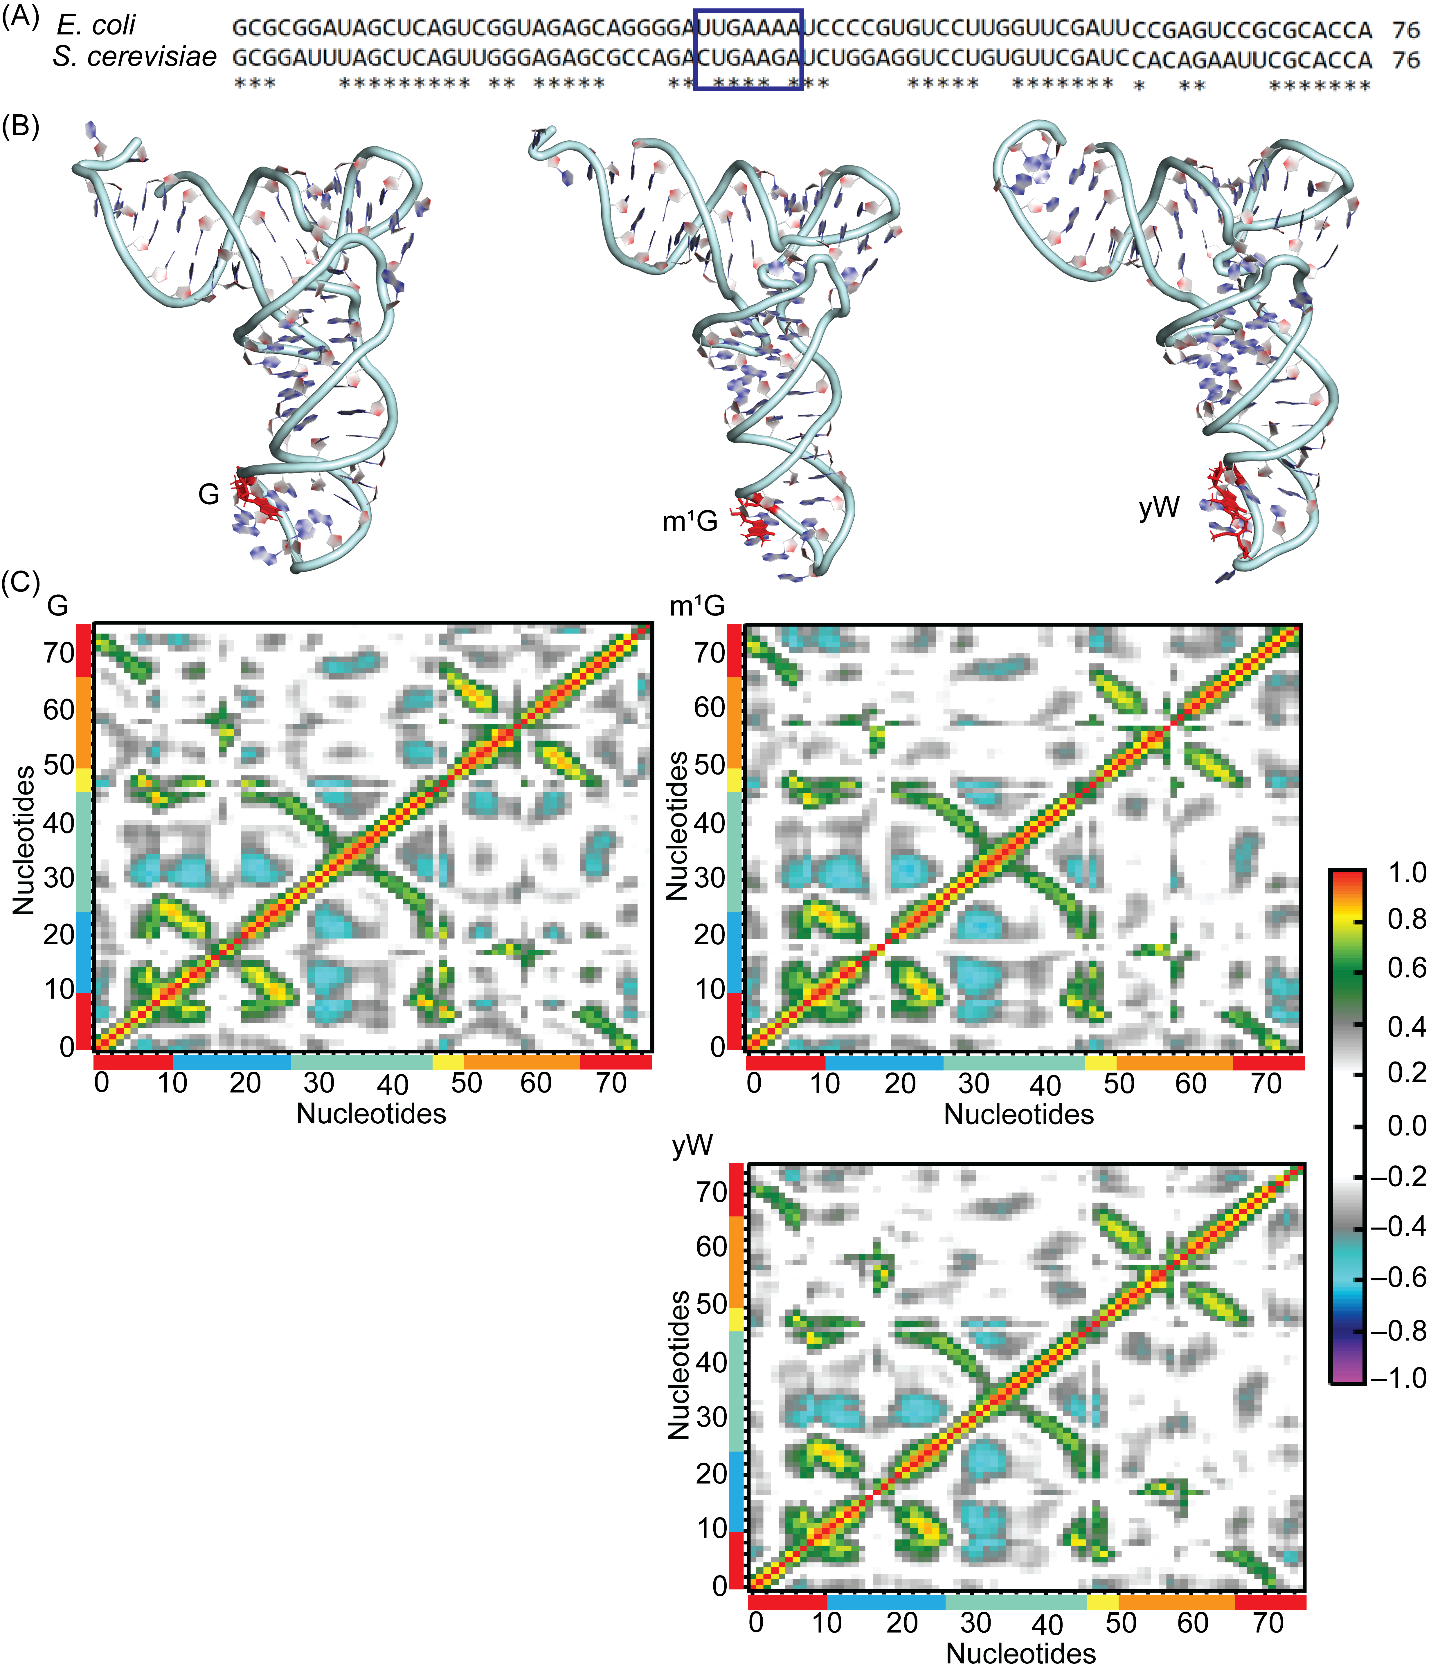


Figure S28. (A) tRNA sequences considered in the present study, with the nucleotides included in the anticodon loop in the blue box. (B) MD representative structures of native G, m1G and yW-tRNA in yeast, with base 37 highlighted in red. (C) Dynamic cross-correlation maps for C1′ atoms in unmodified G, m1G and yW tRNAs over the MD simulations in yeast. The axial color band corresponds to different helical domains in tRNA (red–ACS; blue–DSL; green–ASL; yellow–variable arm; orange–TSL).


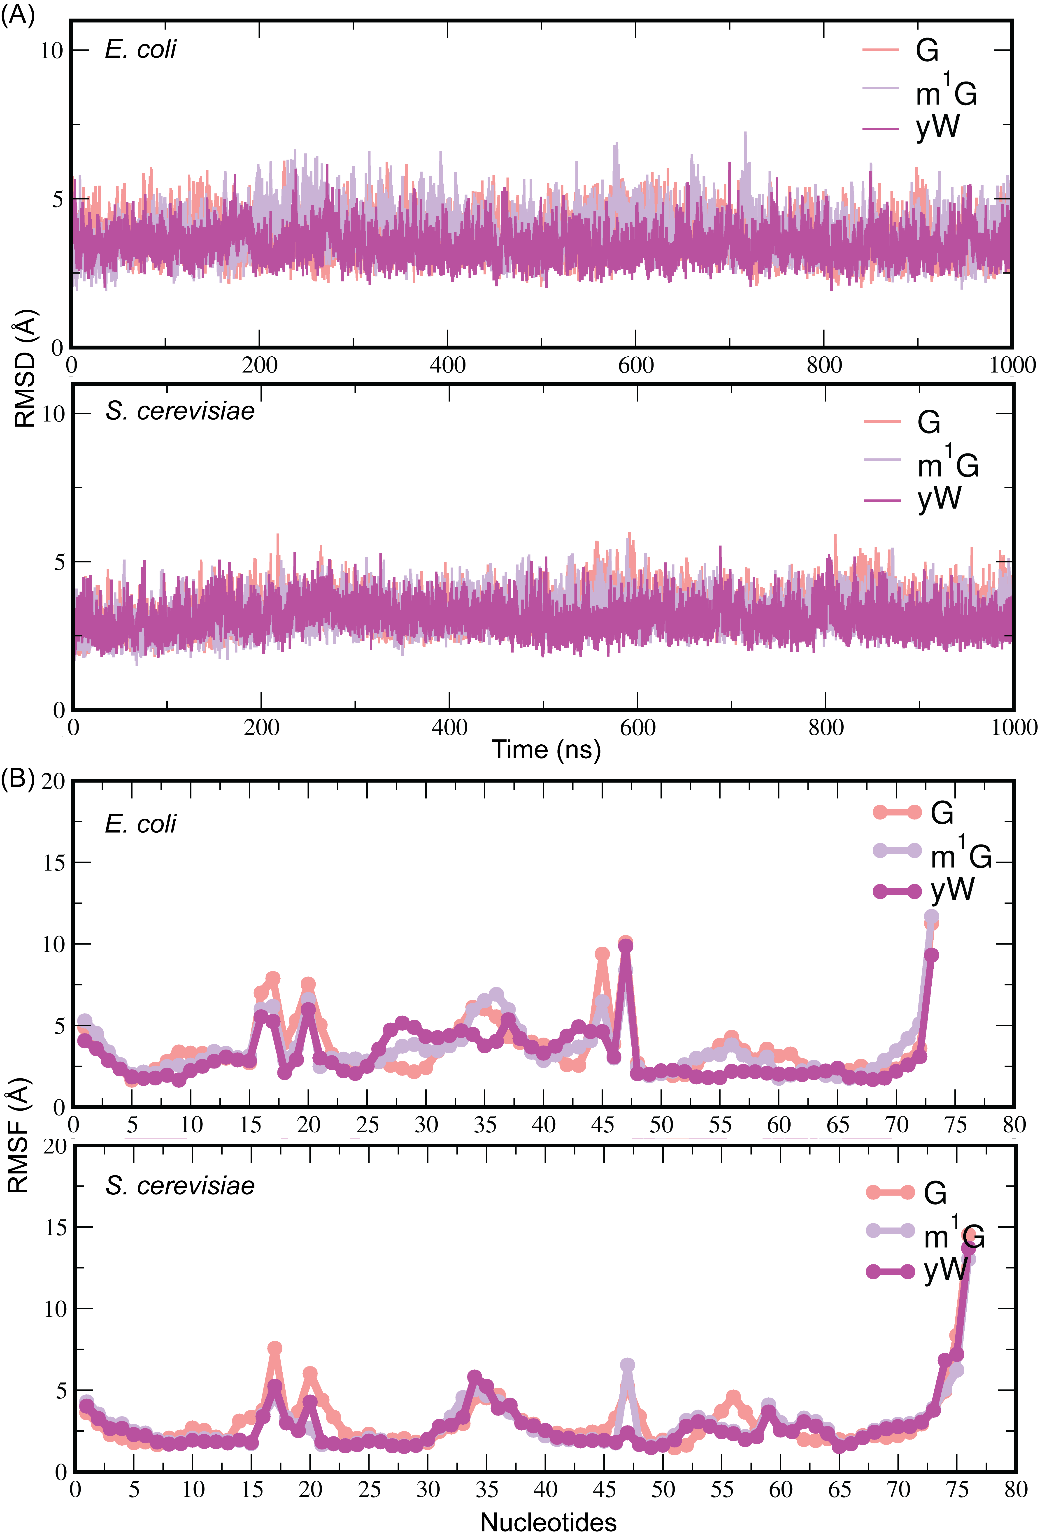


Figure S29. (A) Comparison of backbone root-mean-square deviation (RMSD, Å) and (B) average root-mean-square fluctuation (RMSF, Å) for individual nucleotides in G, m1G and yW-tRNA in *E. coli* and yeast over the MD simulations.


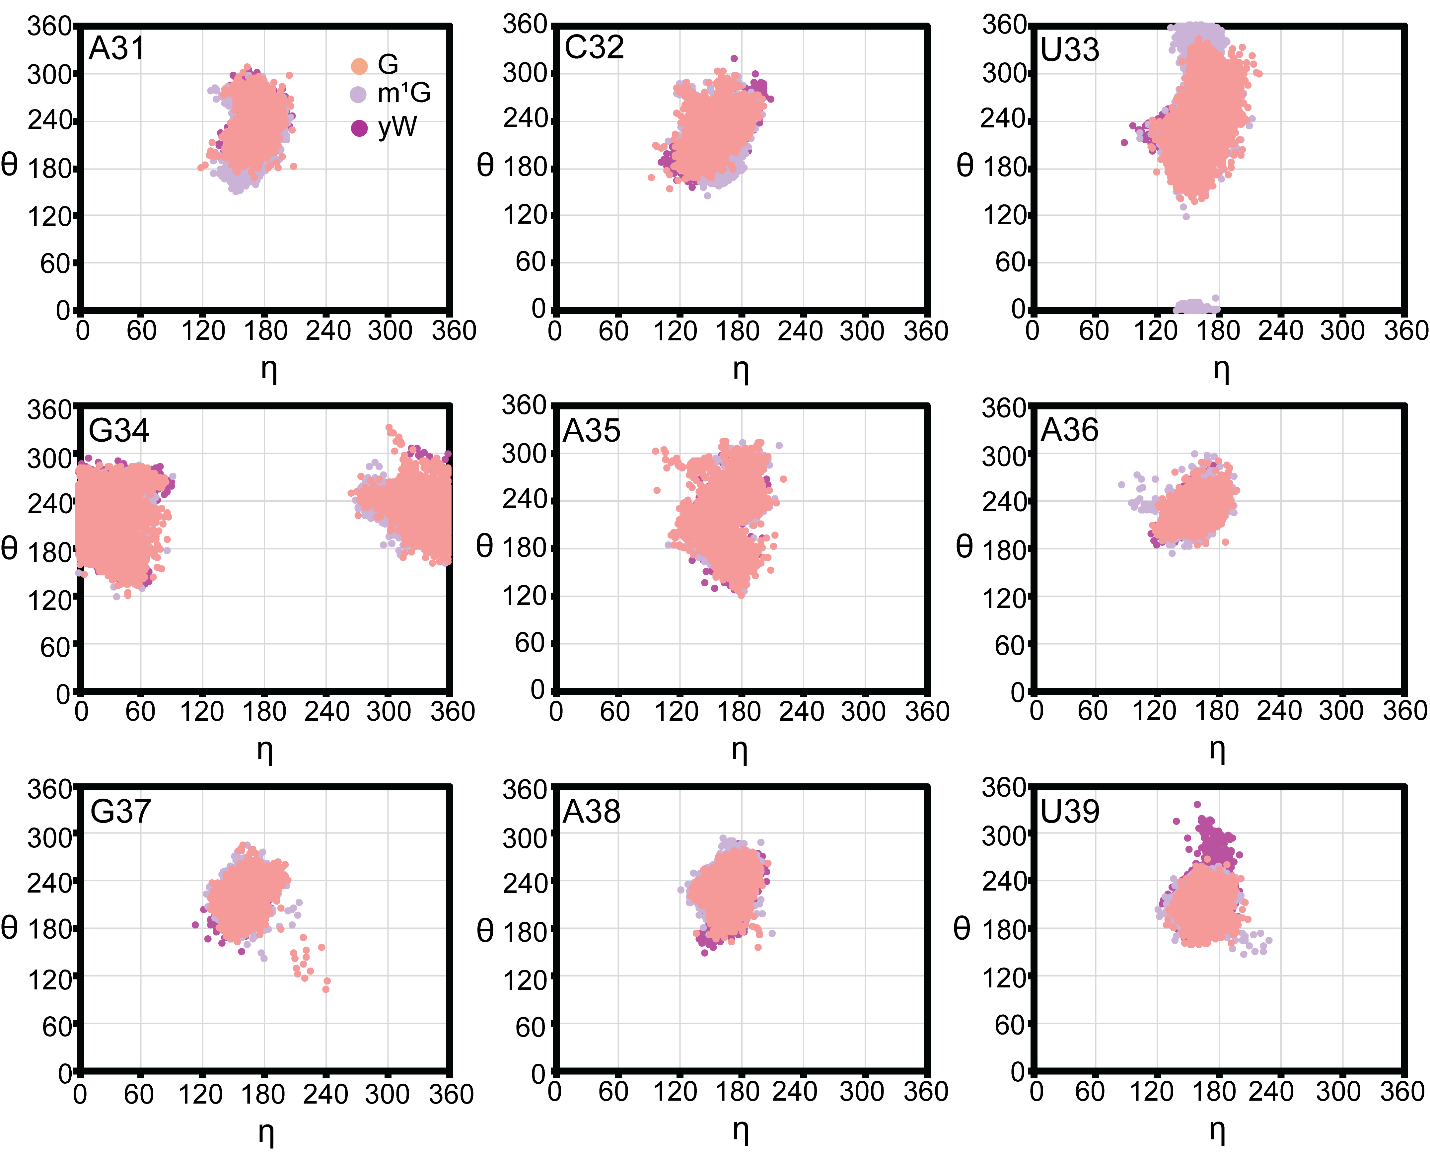


Figure S30. Distribution in the θ and η pseudo backbone torsional angles in the anticodon loop nucleotides for unmodified G, m1G and yW-modified yeast tRNA over MD simulations in yeast.


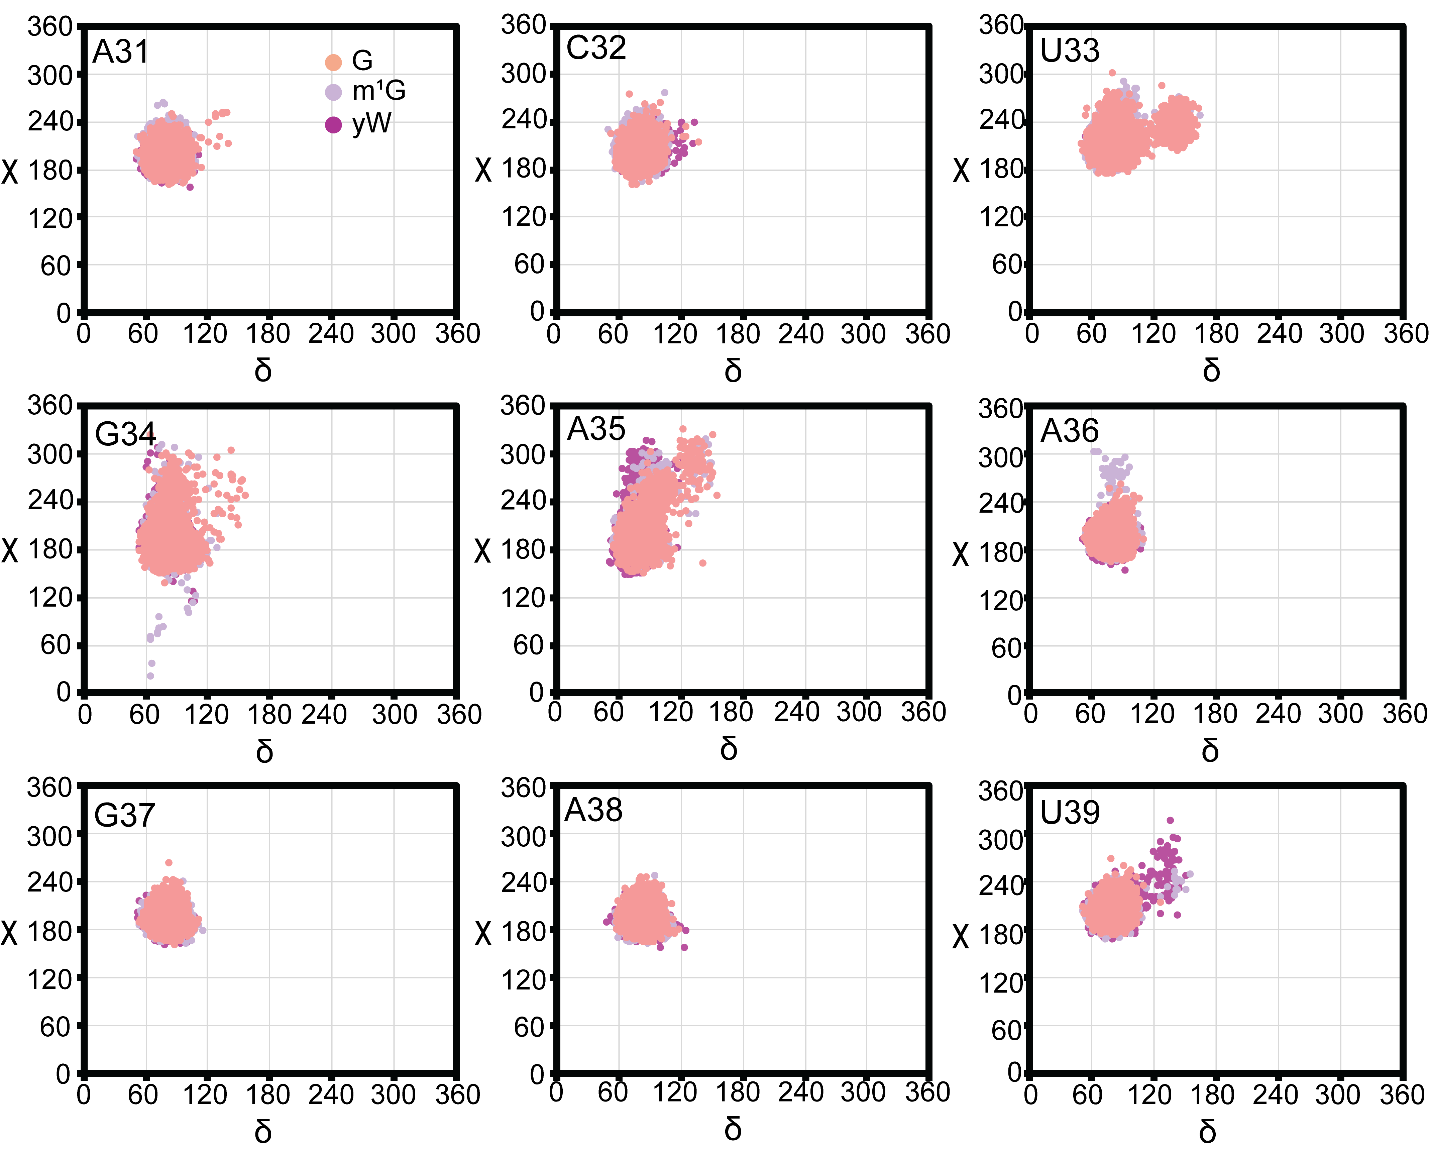


Figure S31. Distribution in the χ and δ torsional angles in the anticodon loop nucleotides for unmodified G, m1G and yW-modified yeast tRNA over MD simulations in yeast.


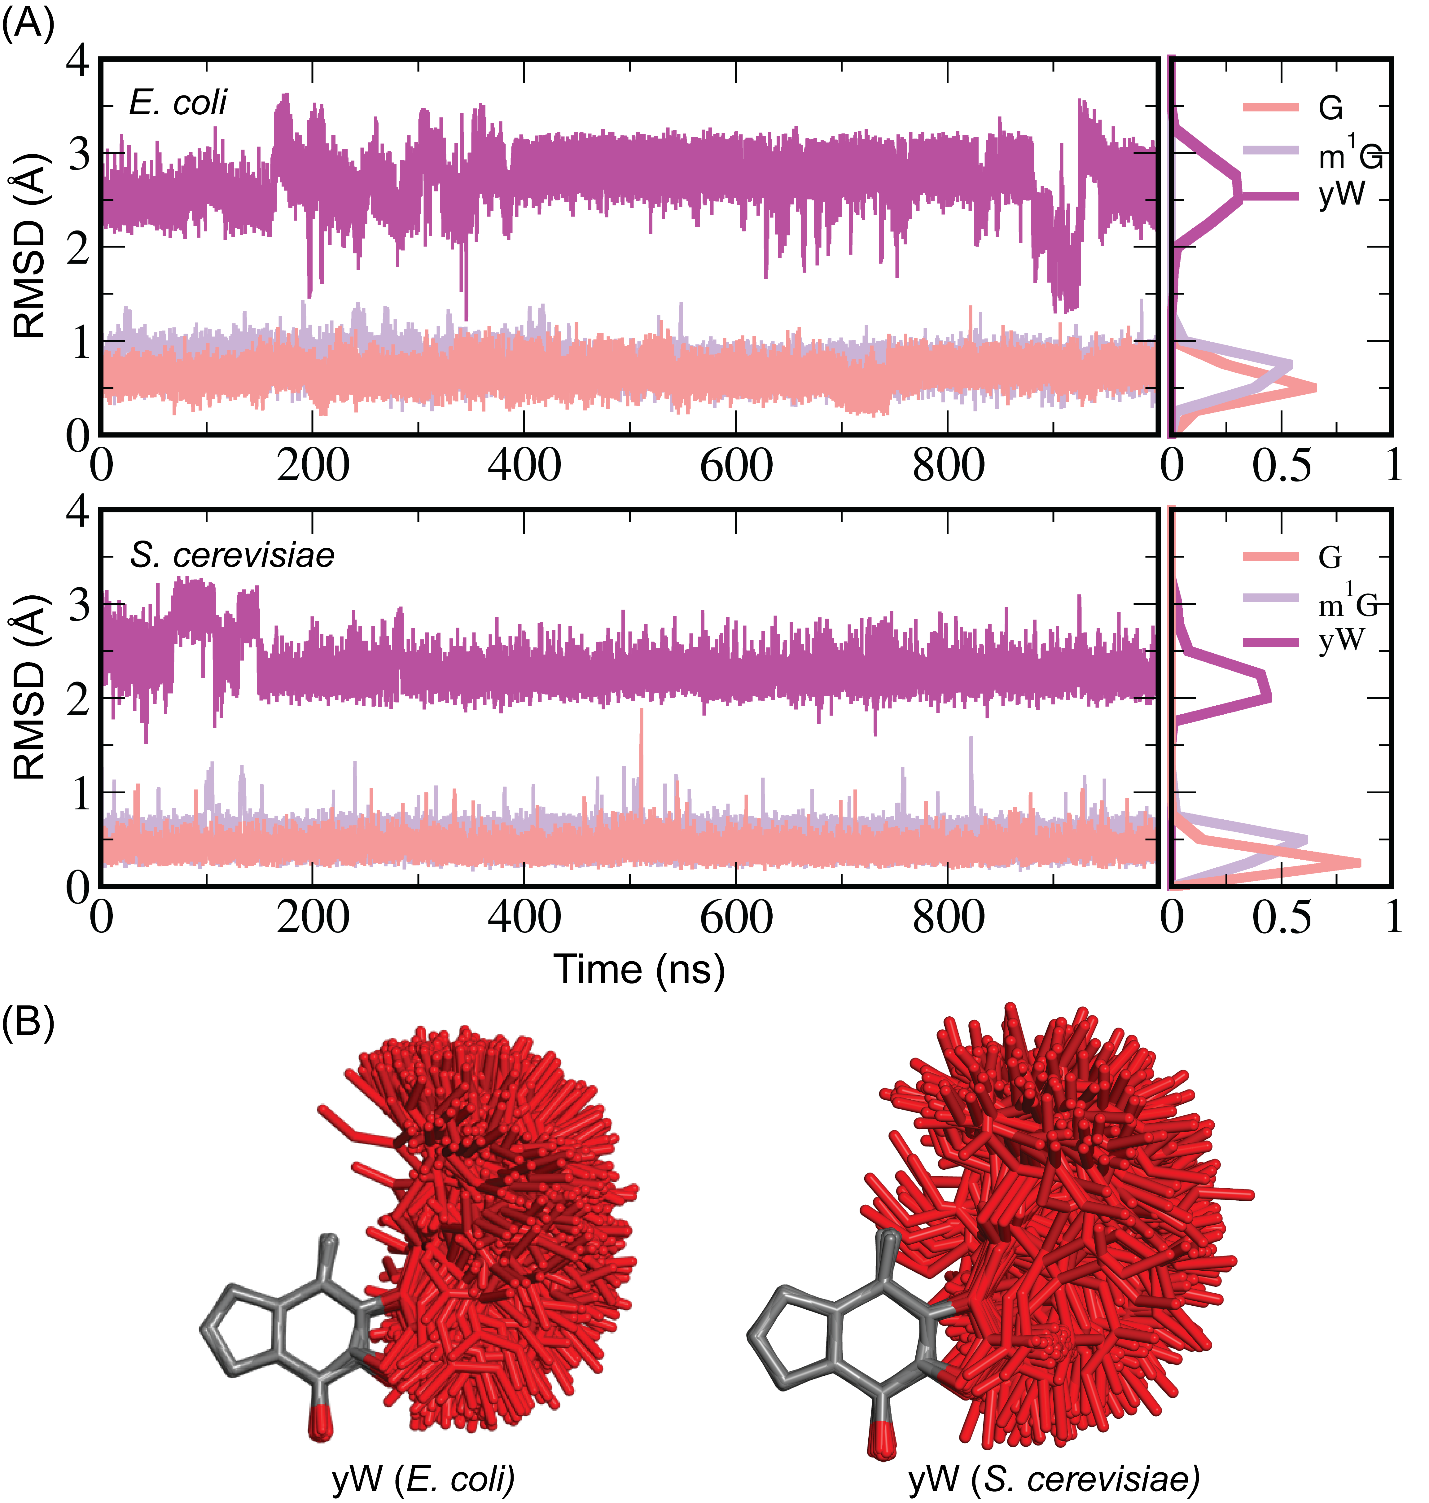


Figure S32. (A) Comparison of the root-mean-square deviation (RMSD, Å) in the G, m1G and yW nucleotide at the 37th position of *E. coli* and yeast tRNA over the MD simulations. (B) Overlays of the yW modified nucleobase in *E. coli* and yeast tRNA with respect to the nucleobase ring for structures taken at 5 ns intervals over the MD simulations.


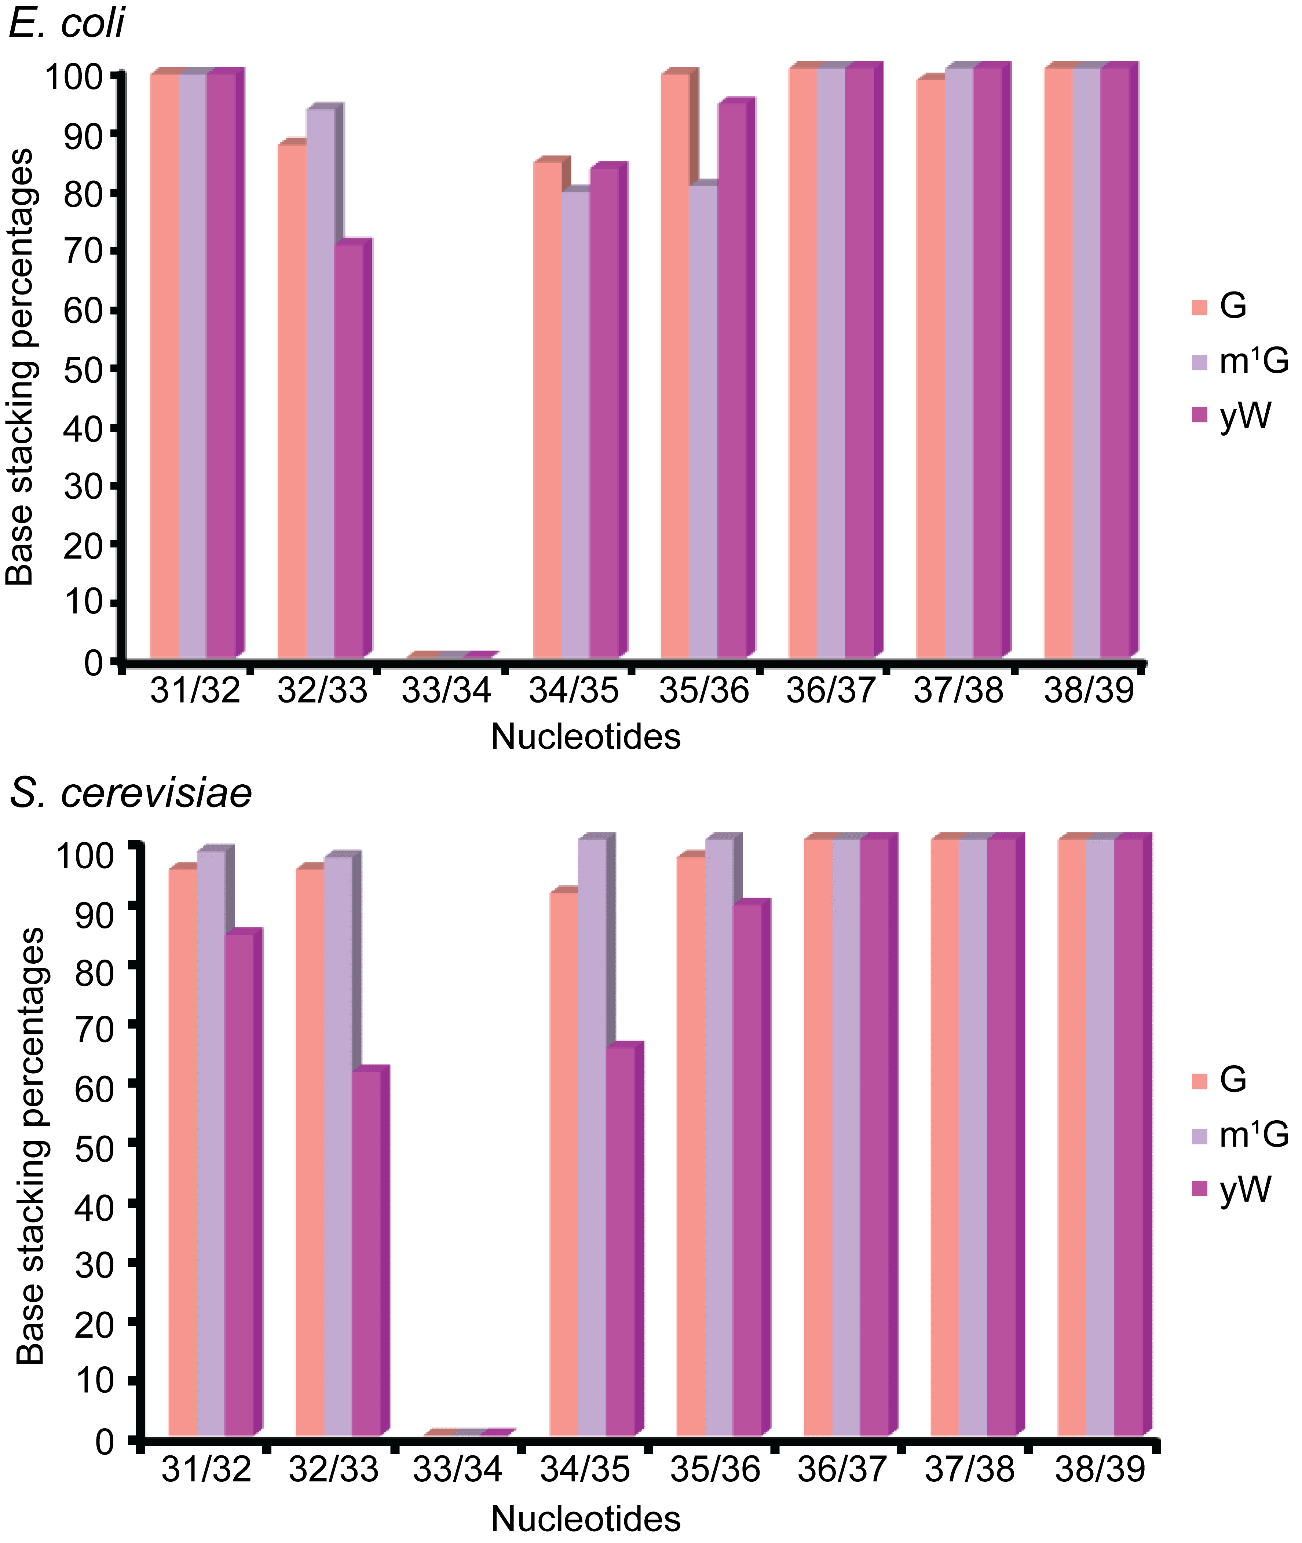


Figure S33. Base stacking percentages between neighboring nucleotides in the anticodon loop for unmodified G, m1G and yW-modified *E.coli* and yeast tRNAs over MD simulations.


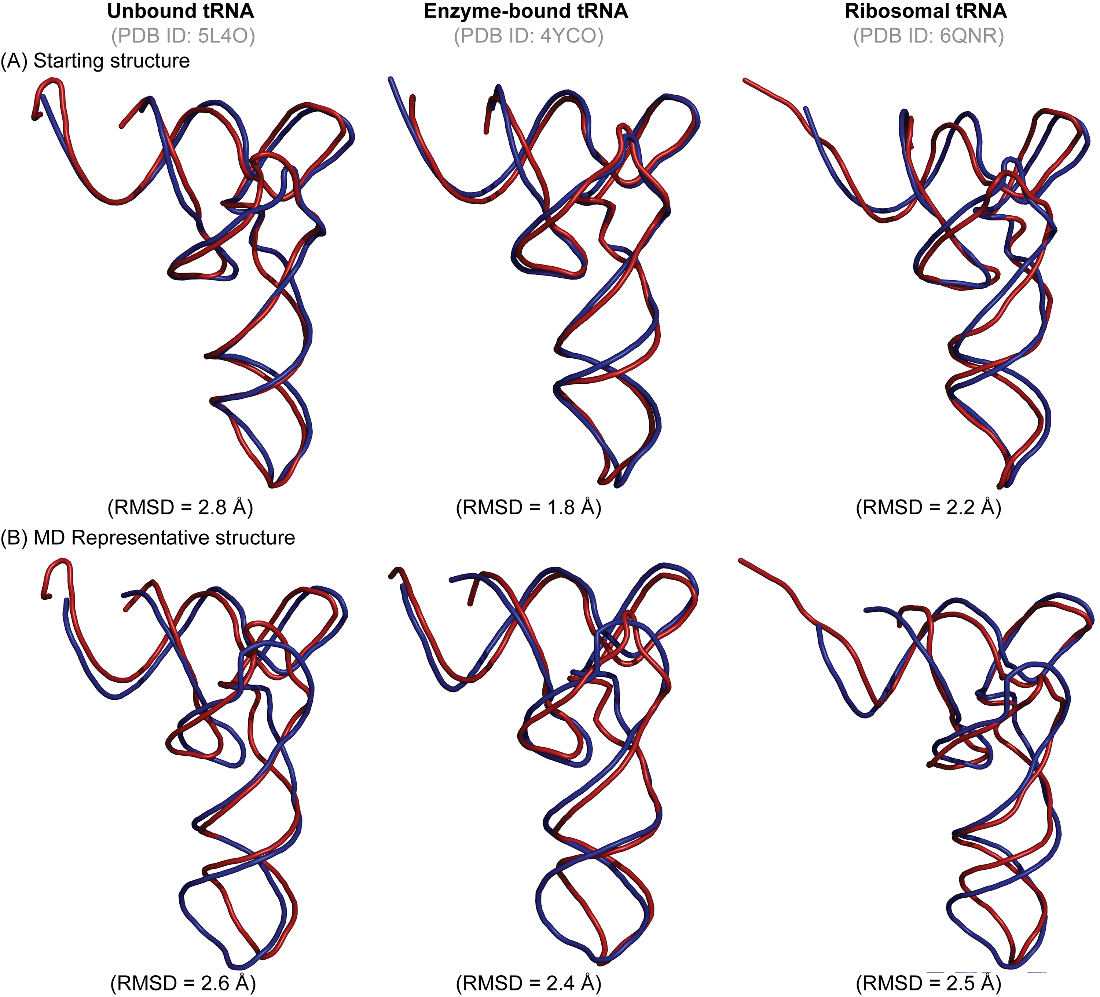


Figure S34: Overlay of modified tRNA crystal structures representing unbound (left), enzyme-bound (tRNA-dihydrouridine synthase, middle) and ribosomal bound (right) tRNA with (A) crystal structure of unmodified tRNA (PDB ID: 3L0U, blue) or (B) MD representative structure of modified tRNA containing i6A at position 37 (blue).


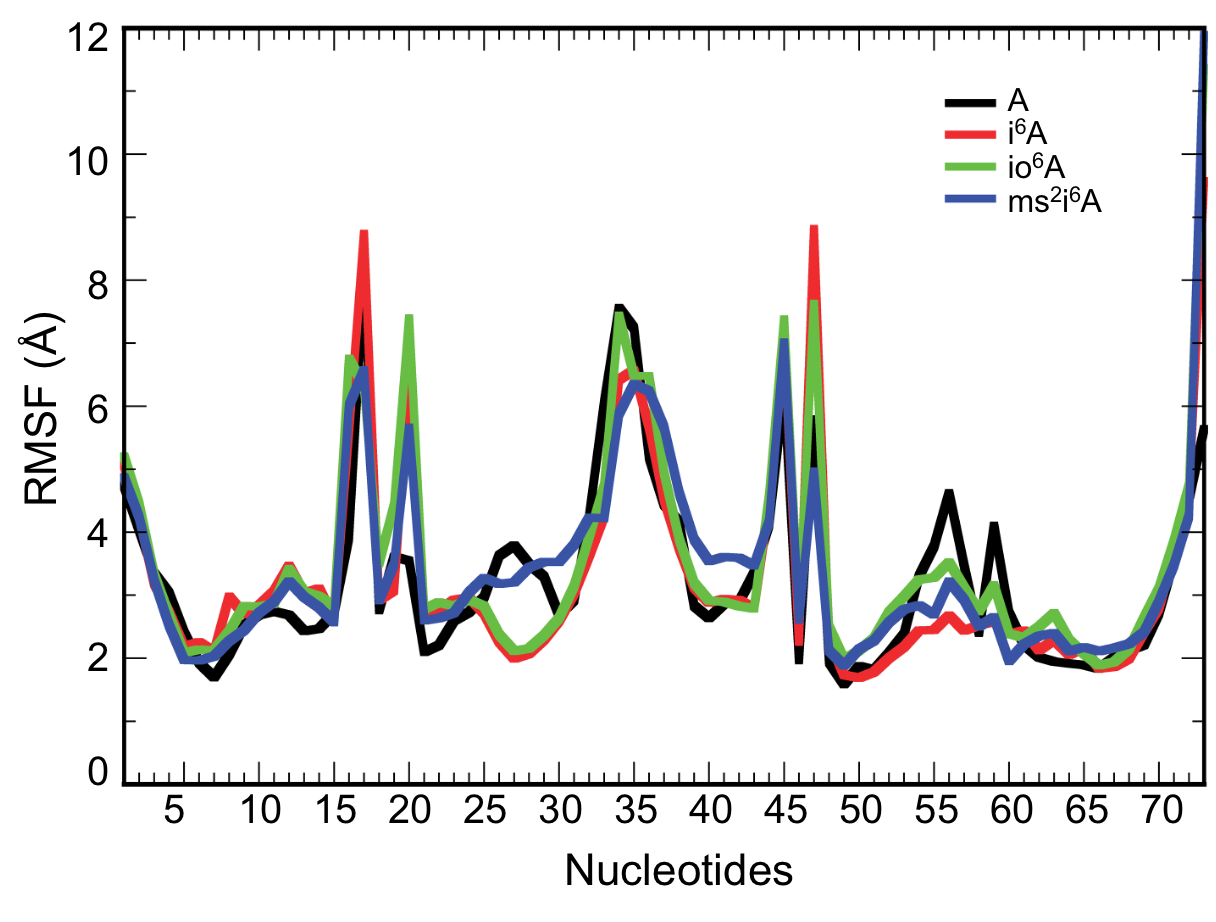


Figure S35: Comparison of average root-mean-square fluctuation (RMSF, Å) for individual nucleotides in unmodified A-tRNA (black) and i6A-modified *E. coli* tRNA averaged over three MD simulation replicas.


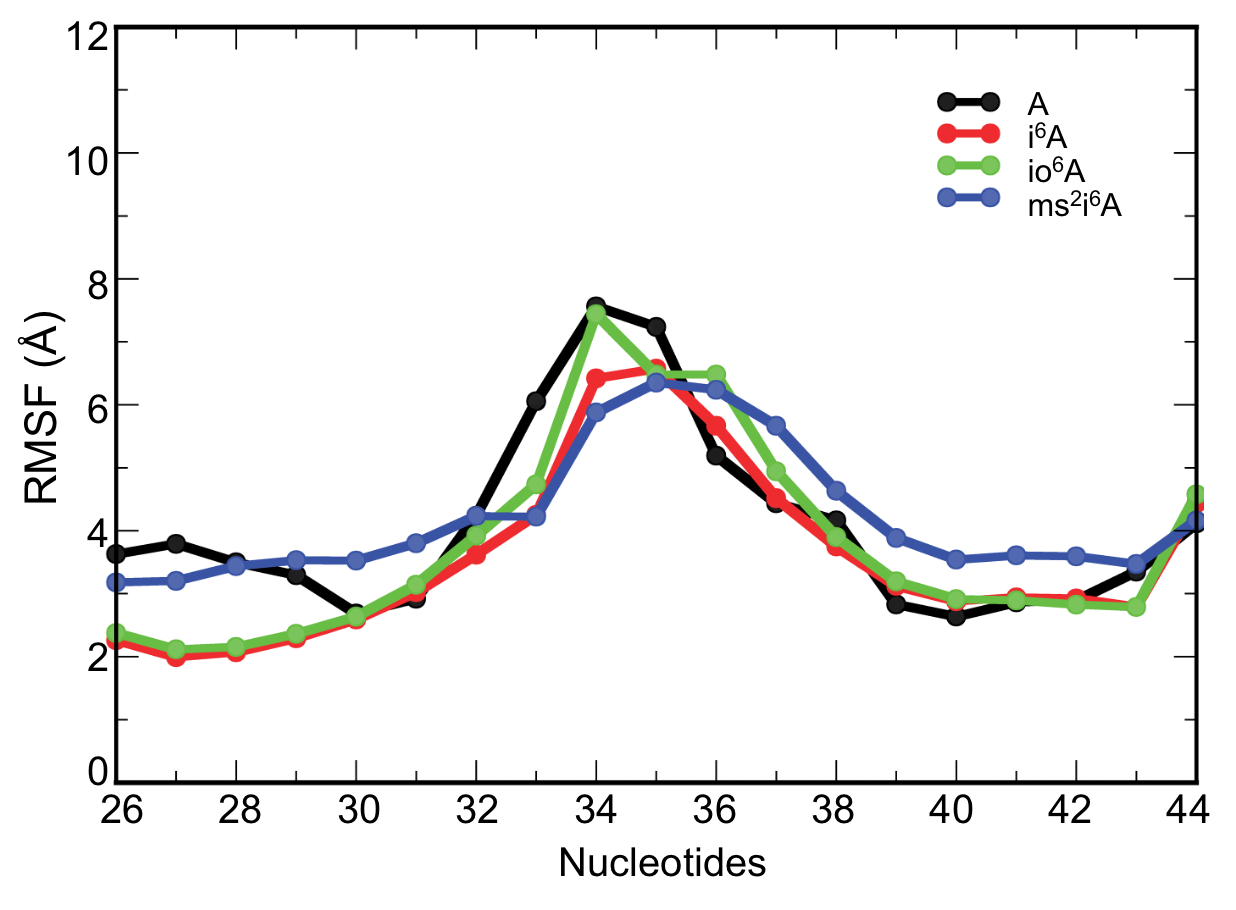


Figure S36: Average structural deviation of anticodon nucleotides (RMSF, Å) over the MD simulations for each i6A-modified tRNA compared to unmodified *E. coli* A-tRNA averaged over three MD simulation replicas.


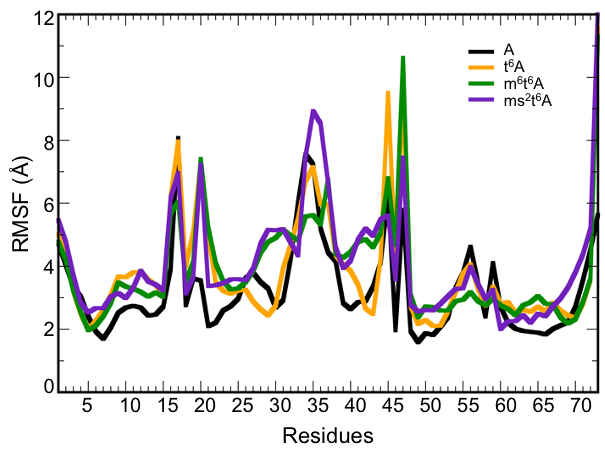


Figure S37: Comparison of average root-mean-square fluctuation (RMSF, Å) for individual nucleotides in unmodified A-tRNA (black) and t6A-modified *E. coli* tRNA averaged over three MD simulation replicas.


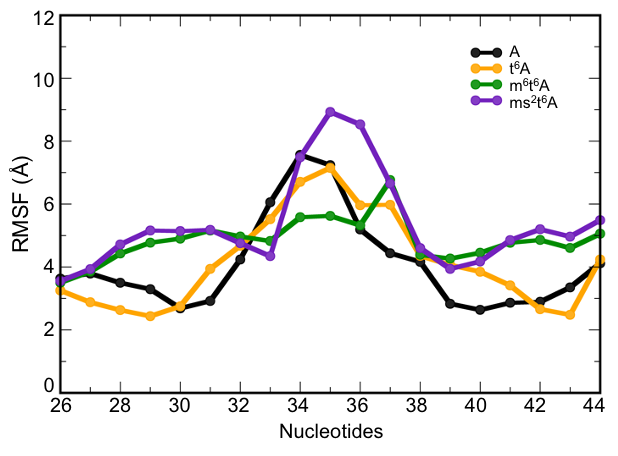


Figure S38: Average structural deviation of anticodon nucleotides (RMSF, Å) over the MD simulations for each t6A-modified tRNA compared to unmodified *E. coli* A-tRNA averaged over three MD simulation replicas.

Figure S39: Comparison of average root-mean-square fluctuation (RMSF, Å) for individual nucleotides in unmodified G, m1G and yW-modified *E. coli* tRNAs averaged over three MD simulation replicas.

Figure S40: Average structural deviation of anticodon nucleotides (RMSF, Å) over the MD simulations for each unmodified G, m1G and yW-modified *E. coli* tRNAs MD simulation replicas.


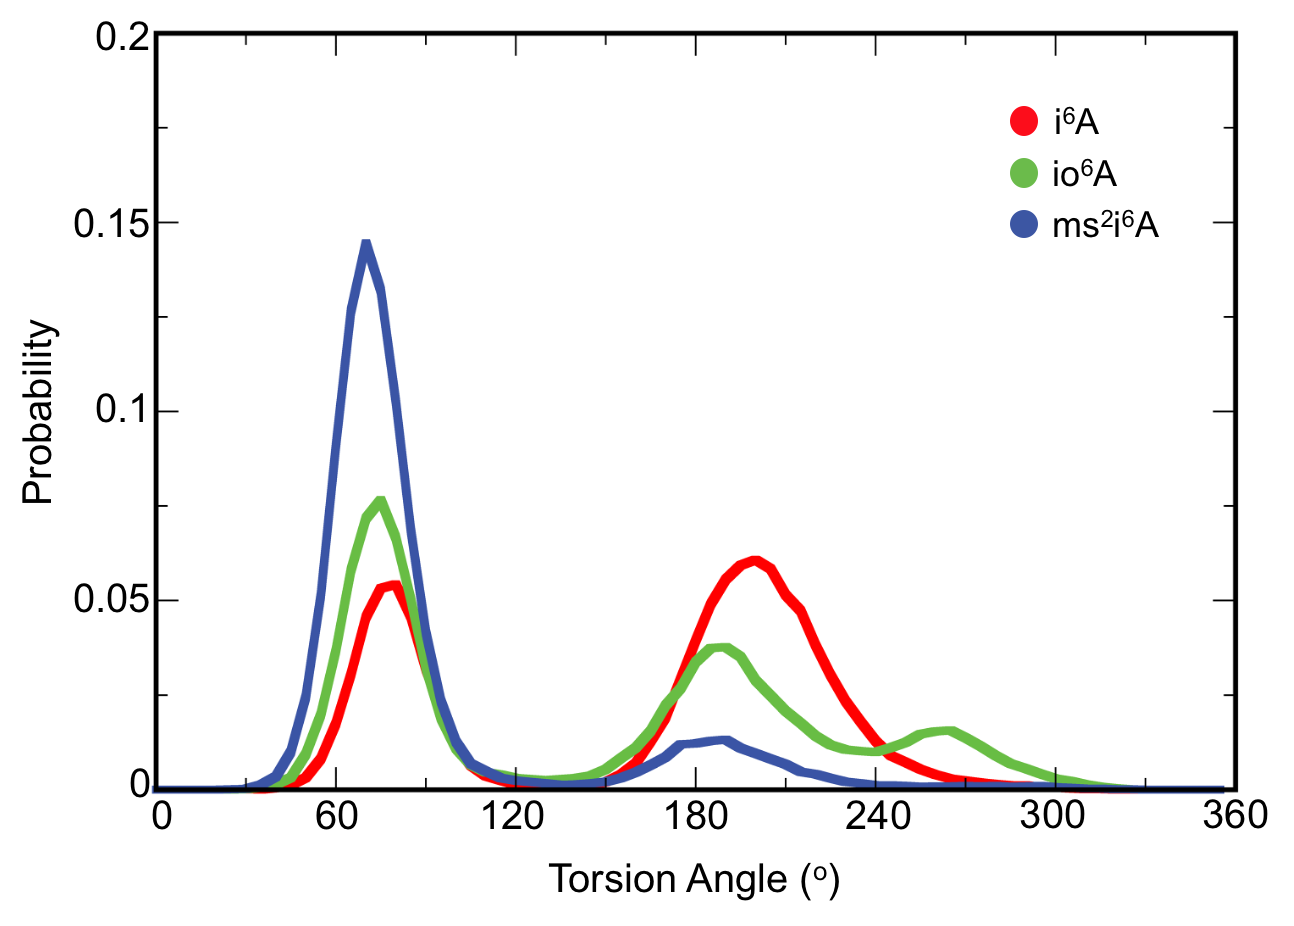


Figure S41: Distribution in the conformations of the bulky moiety of the i6A-modified *E. coli* tRNA nucleotides with respect to φ averaged over the three MD simulation replicas.


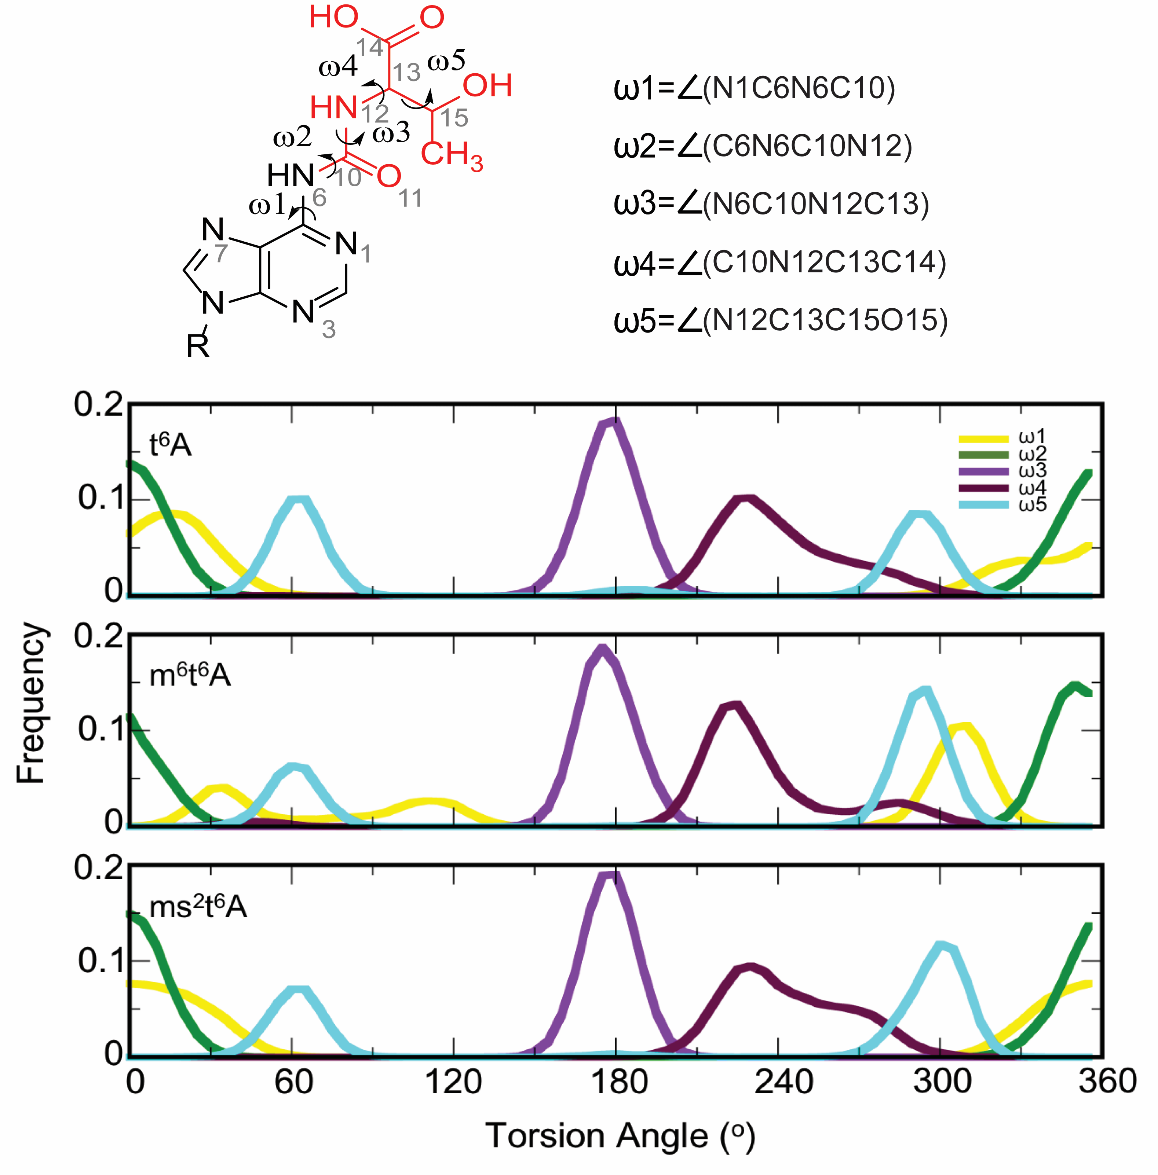


Figure S42. Distribution in the conformations of the bulky moiety of the t6A-modified *E. coli* tRNA nucleotides with respect to ω1, ω2, ω3, ω4, and ω5 averaged over three MD simulation replicas.


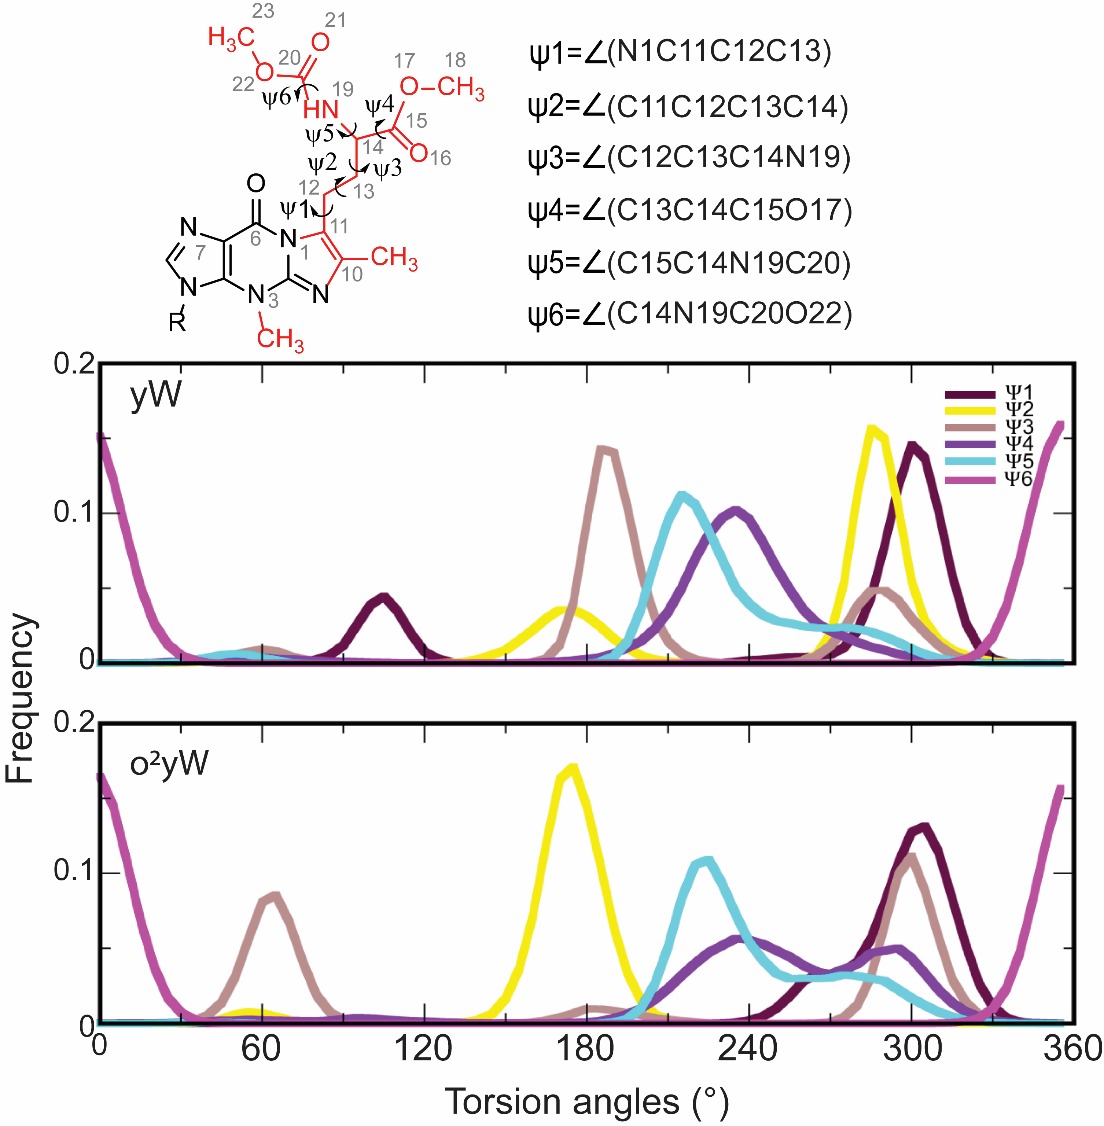


Figure S43. Distribution in the conformations of the bulky moiety of the yW-modified *E. coli* tRNA nucleotides with respect to ψ1, ψ2, ψ3, ψ4, and ψ5 averaged over three MD simulation replicas.

| Table S1: Average root-mean-square deviations in the backbone (avg. RMSD, Å) and standard deviations (in parentheses) for each *E. coli* tRNA over the MD simulations.a | |
| --- | --- |
| tRNA | avg. RMSD (σ) |
| A | 3.257 (0.6) |
| i6A | 3.451 (0.6) |
| io6A | 3.986 (0.8) |
| ms2i6A | 3.671 (0.8) |
| t6A | 4.306 (0.7) |
| m6t6A | 4.493 (0.9) |
| ms2t6A | 4.821 (0.8) |
| G | 3.771 (0.7) |
| yW | 3.439 (0.5) |
| o2yW | 3.625 (0.7) |
| aAverage RMSD was calculated with respect to the initial starting structure. | |

| Table S2: Percent occupancy of hydrogen bonds in the anticodon stem loop of *E. coli* tRNA over the MD simulations.a | | | | | | | | | | | |
| --- | --- | --- | --- | --- | --- | --- | --- | --- | --- | --- | --- |
| Base Pairs | H-Bond  Interactions | A | G | i6A | io6A | ms2i6A | t6A | m6t6A | ms2t6A | yW | o2yW |
| A26–G44 | N1···H–N1 | 27 | 0 | 15 | 41 | 39 | 0 | 73 | 38 | 0 | 0 |
| N6–H···O6 | 45 | 0 | 30 | 70 | 58 | 0 | 73 | 49 | 0 | 0 |
| G27–C43 | N1–H···N3 | 100 | 100 | 100 | 99 | 100 | 100 | 100 | 99 | 100 | 100 |
| N2–H···O2 | 99 | 99 | 99 | 99 | 99 | 99 | 100 | 99 | 100 | 99 |
| O6···H–N4 | 98 | 99 | 97 | 98 | 99 | 99 | 99 | 98 | 98 | 99 |
| G28–C42 | N2–H···O2 | 100 | 100 | 100 | 100 | 100 | 100 | 100 | 100 | 100 | 100 |
| N1–H···N3 | 100 | 100 | 100 | 100 | 100 | 100 | 100 | 100 | 100 | 100 |
| G29–C41 | N2–H···O2 | 100 | 100 | 100 | 100 | 100 | 100 | 100 | 100 | 100 | 100 |
| N1–H···N3 | 100 | 100 | 100 | 100 | 100 | 100 | 100 | 100 | 100 | 100 |
| O6···H–N4 | 99 | 99 | 99 | 99 | 99 | 99 | 99 | 99 | 99 | 99 |
| G30–C40 | N2–H···O2 | 100 | 100 | 100 | 100 | 100 | 100 | 100 | 100 | 100 | 100 |
| N1–H···N3 | 100 | 100 | 100 | 100 | 100 | 100 | 100 | 100 | 100 | 100 |
| O6···H–N4 | 98 | 98 | 98 | 98 | 98 | 98 | 98 | 99 | 98 | 98 |
| A31–U39 | N6–H···O4 | 92 | 93 | 91 | 93 | 92 | 90 | 91 | 91 | 95 | 94 |
| N1···H–N3 | 98 | 98 | 99 | 98 | 99 | 99 | 99 | 99 | 99 | 97 |
| U32–A38 | N3–H···N1 | 77 | 37 | 83 | 61 | 74 | 99 | 98 | 95 | 16 | 7 |
| O4···H–N6 | 74 | 0 | 85 | 60 | 73 | 92 | 84 | 92 | 17 | 63 |
| O2···H–N6 | 0 | 43 | 0 | 25 | 23 | 0 | 0 | 0 | 64 | 7 |
| U33–A/G37 | O2···H–N6/N1 | 90 | 10 | 53 | 29 | 57 | 9 | 0 | 40 | 0 | 0 |
| N3–H···O6 | 0 | 40 | 0 | 0 | 0 | 0 | 0 | 0 | 49 | 36 |

aHydrogen-bonding occupancy was calculated a cut-off of 3.4 Å for distance and 120 for bond angles.

| Table S3: Average donor–acceptor (D–A) hydrogen-bond distances (Å) in the anticodon stem loop of *E. coli* tRNA over the MD simulations. | | | | | | | | | | | |
| --- | --- | --- | --- | --- | --- | --- | --- | --- | --- | --- | --- |
| Base Pairs | H-Bond  Interactions | A | G | i6A | io6A | ms2i6A | t6A | m6t6A | ms2t6A | yW | o2yW |
| A26–G44 | N1···H–N1 | 3.1 | 0 | 3.1 | 3.1 | 3.0 | 0 | 3.0 | 3.0 | 0 | 0 |
| N6–H···O6 | 2.9 | 0 | 2.9 | 2.9 | 2.9 | 0 | 2.9 | 2.9 | 0 | 0 |
| G27–C43 | N1–H···N3 | 2.9 | 2.9 | 2.9 | 2.9 | 2.9 | 2.9 | 2.9 | 2.9 | 2.9 | 3.0 |
| N2–H···O2 | 2.9 | 2.9 | 2.9 | 2.9 | 2.9 | 2.9 | 2.9 | 2.9 | 2.9 | 2.9 |
| N1–H···O2 | 3.3 | 3.3 | 3.3 | 3.3 | 3.4 | 3.7 | 3.3 | 3.3 | 3.3 | 3.3 |
| O6···H–N4 | 2.9 | 2.9 | 2.9 | 2.9 | 2.9 | 2.9 | 2.9 | 2.9 | 2.9 | 2.9 |
| G28–C42 | N2–H···O2 | 2.8 | 2.8 | 2.8 | 2.8 | 2.8 | 2.8 | 2.9 | 2.8 | 2.9 | 2.8 |
| N1–H···N3 | 2.9 | 2.9 | 2.9 | 2.9 | 2.9 | 2.9 | 2.9 | 2.9 | 2.9 | 3.0 |
| N1–H···O2 | 3.3 | 3.3 | 3.3 | 3.3 | 3.3 | 3.3 | 3.3 | 3.3 | 3.3 | 3.3 |
| G29–C41 | N2–H···O2 | 2.9 | 2.8 | 2.8 | 2.9 | 2.9 | 2.9 | 2.9 | 2.9 | 2.9 | 2.8 |
| N1–H···N3 | 2.9 | 2.9 | 2.9 | 2.9 | 2.9 | 2.9 | 2.9 | 2.9 | 2.9 | 2.9 |
| O6···H–N4 | 2.9 | 2.9 | 2.9 | 2.9 | 2.9 | 2.9 | 2.9 | 2.9 | 2.9 | 2.9 |
| G30–C40 | N2–H···O2 | 2.9 | 2.9 | 2.9 | 2.9 | 2.9 | 2.9 | 2.9 | 2.9 | 2.9 | 3.0 |
| N1–H···N3 | 3.0 | 2.9 | 2.9 | 2.9 | 2.9 | 2.9 | 2.9 | 2.9 | 2.9 | 2.9 |
| O6···H–N4 | 2.9 | 2.9 | 2.9 | 2.9 | 2.9 | 2.9 | 2.9 | 2.9 | 2.9 | 2.9 |
| A31–U39 | N6–H···O4 | 2.9 | 2.9 | 3.0 | 2.9 | 3.0 | 3.0 | 3.0 | 2.9 | 2.9 | 3.0 |
| N1···H–N3 | 2.9 | 2.9 | 2.9 | 2.9 | 2.9 | 2.9 | 2.9 | 2.9 | 2.9 | 3.0 |
| U32–A38 | N3–H···N1 | 2.9 | 2.9 | 2.9 | 2.9 | 2.9 | 2.9 | 2.9 | 3.0 | 3.0 | 3.0 |
| O4···H–N6 | 2.9 | 0 | 2.9 | 2.9 | 2.9 | 2.9 | 3.0 | 2.9 | 2.9 | 2.9 |
| O2···H–N6 | 0 | 2.9 | 0 | 2.9 | 2.9 | 0 | 0 | 0 | 2.9 | 2.9 |
| U33–A/G37 | O2···H–N6/N1 | 2.9 | 2.9 | 3.0 | 3.1 | 2.9 | 0 | 0 | 3.0 | 0 | 0 |
| N3–H···O6 | 0 | 2.9 | 0 | 0 | 0 | 0 | 0 | 0 | 2.9 | 2.9 |
| aHydrogen-bonding parameters were calculated with a cut-off of 3.4 Å for distance and 120° for bond angles. | | | | | | | | | | | |

| Table S4: Average donor–hydrogen–acceptor hydrogen-bond angle (°) in the anticodon stem loop of *E. coli* tRNA over the MD simulations. | | | | | | | | | | | |
| --- | --- | --- | --- | --- | --- | --- | --- | --- | --- | --- | --- |
| Base Pairs | H-Bond  Interactions | A | G | i6A | io6A | ms2i6A | t6A | m6t6A | ms2t6A | yW | o2yW |
| A26–G44 | N1···H–N1 | 158.1 | 0.0 | 146.8 | 159.4 | 157.7 | 0 | 160.4 | 156.3 | 0 | 0 |
| N6–H···O6 | 158.1 | 0.0 | 149.5 | 158.9 | 158.0 | 0 | 162.9 | 158.2 | 0 | 0 |
| G27–C43 | N1–H···N3 | 163.9 | 163.9 | 163.9 | 163.9 | 164.5 | 163.9 | 165.5 | 164.3 | 164.4 | 164.2 |
| N2–H···O2 | 162.9 | 164.3 | 162.1 | 163.3 | 163.3 | 164.5 | 164.2 | 162.7 | 161.9 | 164.4 |
| N1–H···O2 | 136.9 | 137.5 | 136.5 | 137.0 | 136.5 | 137.5 | 134.9 | 136.5 | 136.4 | 137.4 |
| O6···H–N4 | 160.9 | 161.1 | 160.8 | 162.0 | 161.9 | 161.1 | 162.8 | 161.4 | 157.2 | 160.8 |
| G28–C42 | N2–H···O2 | 164.4 | 164.6 | 164.4 | 164.4 | 164.4 | 164.6 | 163.7 | 164.2 | 164.1 | 164.7 |
| N1–H···N3 | 165.8 | 165.6 | 165.8 | 165.7 | 165.6 | 165.6 | 165.3 | 165.4 | 165.6 | 165.4 |
| N1–H···O2 | 134.4 | 134.4 | 134.2 | 134.4 | 134.2 | 134.4 | 134.2 | 134.4 | 134.5 | 134.4 |
| G29–C41 | N2–H···O2 | 164.5 | 164.7 | 164.5 | 164.4 | 164.6 | 164.6 | 164.5 | 164.7 | 164.8 | 164.7 |
| N1–H···N3 | 166.1 | 165.9 | 165.9 | 165.9 | 165.9 | 165.9 | 165.7 | 165.9 | 165.8 | 165.9 |
| O6···H–N4 | 162.6 | 163.2 | 162.6 | 162.7 | 162.8 | 162.9 | 162.7 | 163.0 | 163.2 | 163.1 |
| G30–C40 | N2–H···O2 | 164.1 | 164.2 | 163.9 | 164.0 | 163.8 | 163.4 | 163.4 | 163.7 | 164.2 | 165.5 |
| N1–H···N3 | 165.9 | 165.6 | 165.7 | 165.7 | 165.5 | 164.9 | 164.9 | 164.9 | 165.6 | 164.0 |
| O6···H–N4 | 161.9 | 161.6 | 161.6 | 161.4 | 160.7 | 160.6 | 160.8 | 160.7 | 161.7 | 161.1 |
| A31–U39 | N6–H···O4 | 162.4 | 161.2 | 162.2 | 162.5 | 161.9 | 161.2 | 161.4 | 160.0 | 161.8 | 162.1 |
| N1···H–N3 | 161.2 | 162.1 | 162.7 | 162.4 | 160.0 | 162.6 | 161.9 | 161.4 | 162.5 | 162.3 |
| U32–A38 | N3–H···N1 | 158.9 | 160.8 | 158.2 | 162.4 | 162.2 | 160.4 | 159.1 | 162.9 | 161.6 | 153.6 |
| O4···H–N6 | 163.4 | 0 | 162.1 | 161.5 | 160.8 | 160.6 | 157.4 | 161.6 | 155.8 | 147.5 |
| O2···H–N6 | 0 | 150.7 | 0 | 161.5 | 153.5 | 0 | 0 | 0 | 148.6 | 159.8 |
| U33–A/G37 | O2···H–N6/N1 | 160.2 | 157.9 | 156.0 | 152.3 | 153.1 | 0 | 0 | 146.1 | 0 | 0 |
| N3–H···O6 | 0 | 149.5 | 0 | 0 | 0 | 0 | 0 | 0 | 152.6 | 145.8 |
| aHydrogen-bonding parameters were calculated with a cut-off of 3.4 Å for distance and 120° for bond angles. | | | | | | | | | | | |

| Table S5: Average nucleotide distance (C1′–C1′, Å) between base pairs in the anticodon stem loop of *E. coli* tRNA over the MD simulations (standard deviation in parentheses). | | | | | | | | | | |
| --- | --- | --- | --- | --- | --- | --- | --- | --- | --- | --- |
| Base pairs | A | G | i6A | io6A | ms2i6A | t6A | m6t6A | ms2t6A | yW | o2yW |
| 26–44 | 12.8 (0.9) | 12.6 (0.5) | 12.5 (0.7) | 13.1 (0.9) | 12.7 (0.9) | 12.5 (0.5) | 12.1 (1.5) | 12.5 (0.8) | 12.4 (0.7) | 12.4 (0.5) |
| 27–43 | 10.7 (0.2) | 10.8 (0.2) | 10.7 (0.2) | 10.8 (0.2) | 10.8 (0.2) | 10.8  (0.2) | 10.7  (0.2) | 10.7  (0.2) | 10.7  (0.2) | 10.8 (0.2) |
| 28–42 | 10.7 (0.2) | 10.7 (0.2) | 10.7 (0.2) | 10.7 (0.2) | 10.7 (0.2) | 10.7  (0.2) | 10.7  (0.2) | 10.7  (0.2) | 10.7  (0.2) | 10.7 (0.2) |
| 29–41 | 10.7 (0.2) | 10.7 (0.2) | 10.7 (0.2) | 10.7 (0.2) | 10.7 (0.2) | 10.7  (0.2) | 10.7  (0.2) | 10.7  (0.2) | 10.7  (0.2) | 10.7 (0.2) |
| 30–40 | 10.7 (0.2) | 10.7 (0.2) | 10.7 (0.2) | 10.7 (0.2) | 10.7 (0.2) | 10.7  (0.2) | 10.7  (0.2) | 10.7  (0.2) | 10.7  (0.2) | 10.7 (0.2) |
| 31–39 | 10.6 (0.3) | 10.6 (0.3) | 10.5 (0.3) | 10.6 (0.3) | 10.6 (0.3) | 10.5  (0.3) | 10.5  (0.3) | 10.5  (0.3) | 10.7  (0.3) | 10.7 (0.3) |
| 32–38 | 10.6 (0.4) | 11.0 (0.6) | 10.7 (0.4) | 10.9 (0.5) | 10.7 (0.4) | 10.5  (0.3) | 10.3  (0.3) | 10.7  (0.4) | 11.2  (0.5) | 10.7 (0.3) |
| 33–37 | 9.6 (0.6) | 10.8 (1.0) | 10.3 (1.1) | 10.3 (1.0) | 10.1 (1.3) | 10.0  (0.7) | 10.1  (0.5) | 10.6  (1.1) | 11.3  (0.8) | 11.0 (0.6) |

| Table S6: Base stacking propensities (percentage) between nucleotides in the anticodon stem loop of *E. coli* tRNA over the MD simulations.a | | | | | | | | | | |
| --- | --- | --- | --- | --- | --- | --- | --- | --- | --- | --- |
| Bases | A | G | i6A | io6A | ms2i6A | t6A | m6t6A | ms2t6A | yW | o2yW |
| 31/32 | 100 | 99 | 100 | 100 | 100 | 100 | 99 | 100 | 99 | 98 |
| 32/33 | 98 | 87 | 77 | 92 | 72 | 28 | 45 | 57 | 70 | 36 |
| 33/34 | 0 | 0 | 0 | 0 | 0 | 0 | 0 | 0 | 0 | 0 |
| 34/35 | 14 | 84 | 56 | 4 | 70 | 67 | 35 | 58 | 83 | 83 |
| 35/36 | 96 | 99 | 97 | 16 | 94 | 10 | 37 | 39 | 94 | 99 |
| 36/37 | 100 | 100 | 79 | 84 | 77 | 95 | 69 | 100 | 100 | 70 |
| 37/38 | 100 | 98 | 100 | 98 | 100 | 98 | 82 | 84 | 100 | 97 |
| 38/39 | 100 | 100 | 100 | 100 | 100 | 100 | 100 | 99 | 100 | 100 |
| The base stacking percentage between anticodon loop nucleotides were calculated based on the geometric criteria that the distance between the center of mass of two bases was 6Å and the angle between the two normal vectors of the bases was 40° and 140°. Further, the ratio of the number of conformations with stacked bases to the total number of conformations from each trajectory was used to estimate the extent of base stacking in percent. | | | | | | | | | | |

| Table S7: Average glycosidic torsion angle (χ, °) for nucleotides in the anticodon stem loop of *E. coli* tRNA over the MD simulations (standard deviation in parentheses).a | | | | | | | | | | |
| --- | --- | --- | --- | --- | --- | --- | --- | --- | --- | --- |
| Bases | A | G | i6A | io6A | ms2i6A | t6A | m6t6A | ms2t6A | yW | o2yW |
| 31 | –162.7 (8.2) | –161.5 (8.5) | –158.8 (8.7) | –161.1 (8.8) | –158.7 (8.8) | –155.4 (9.3) | –155.9 (10.6) | –157.7 (9.2) | –159.4 (9.1) | –155.8 (9.1) |
| 32 | –155.5 (9.3) | –151.0 (11.2) | –147.8 (10.4) | –150.1 (10.3) | –147.1 (10.6) | –136.2 (13.4) | –138.9 (18.2) | –140.2 (12.6) | –145.9 (12.9) | –138.7 (12.8) |
| 33 | –143.4 (10.8) | –141.4 (15.8) | –137.4 (12.2) | –137.8 (14.6) | –135.7 (13.7) | –146.7 (10.2) | –142.5 (14.3) | –142.8 (48.9) | –141.9 (15.2) | –126.9 (16.8) |
| 34 | –169.6 (10.9) | –167.2 (33.2) | –172.8 (16.1) | 53.4 (92.1) | –173.5 (14.0) | 85.6  (79.2) | –125.7 (78.4) | –149.9 (58.9) | –172.5 (12.3) | –49.1 (17.4) |
| 35 | –171.7 (13.7) | –167.8 (10.8) | –166.9 (14.3) | –92.7 (66.2) | –165.5 (25.3) | –90.3 (48.8) | –76.7 (32.1) | –97.1 (33.6) | –169.3 (30.9) | –140.6 (11.4) |
| 36 | –166.2 (7.7) | –163.6 (8.7) | –164.7 (8.3) | –169.6 (11.6) | –165.5 (9.1) | –73.7 (10.9) | –86.1 (29.7) | –93.5 (24.9) | –164.6 (9.1) | –156.4 (8.6) |
| 37 | –171.8 (7.8) | –166.1 (9.4) | –170.3 (8.5) | –166.2 (9.1) | –171.7 (8.3) | –170.2 (11.7) | –167.5 (17.3) | –72.0 (26.7) | –167.4 (8.6) | –149.2 (8.2) |
| 38 | –163.1 (9.6) | –166.4 (9.7) | –168.8 (10.5) | –170.0 (11.9) | –164.6 (10.5) | –148.0 (8.9) | –150.9 (9.4) | –147.7 (11.7) | –170.8 (9.6) | –156.4 (7.6) |
| 39 | –156.9 (9.8) | –157.1 (9.5) | –157.3 (9.3) | –157.7 (9.5) | –155.7 (9.6) | –148.3 (9.4) | –150.2 (9.4) | –147.6 (9.6) | –158.7 (8.9) | –157.4 (8.9) |
| χ–torsion angle ((O4′C1′N9C4)) for the anticodon loop bases at position 31–39 was calculated in unmodified (A and G–tRNA) and modified tRNAs over the MD simulations. | | | | | | | | | | |

| Table S8: Average nucleobase stacking interaction energies (standard deviations in parentheses, kcal/mol) for each *E. coli* tRNA over the MD simulations. | | |
| --- | --- | --- |
| tRNA | 36–37 | 37–38 |
| A | –4.6 (0.7) | –5.7 (0.9) |
| i6A | –4.8 (0.8) | –6.5 (1.0) |
| io6A | –5.5 (1.0) | –7.7 (2.3) |
| ms2i6A | –5.2 (1.0) | –9.0 (1.6) |
| t6A | –8.8 (2.7) | –7.6 (1.1) |
| m6t6A | –8.5 (2.8) | –8.9 (3.1) |
| ms2t6A | –9.2 (1.9) | –8.4 (2.3) |
| G | –5.0 (1.1) | –6.7 (2.5) |
| yW | –9.5 (2.4) | –7.6 (1.9) |
| o2yW | –10.0 (1.6) | –10.5 (3.6) |

| Table S9: Lowest, highest and average 33–37 base pair interaction energies (standard deviations in parentheses, kcal/mol) for each *E. coli* tRNA over the MD simulations. | | | |
| --- | --- | --- | --- |
| Bases | Lowest | Highest | Average (σ) |
| A | 0.7 | –4.1 | –3.1 (1.1) |
| G | 5.6 | –19.4 | –2.5 (5.7) |
| i6A | 0.4 | –5.7 | –3.6 (1.9) |
| io6A | 0.6 | –6.8 | –2.6 (2.0) |
| ms2i6A | 0.2 | –8.8 | –4.0 (1.7) |
| t6A | 4.3 | –9.9 | –3.9 (2.4) |
| m6t6A | –0.7 | –7.3 | –3.9 (1.4) |
| ms2t6A | 4.9 | –9.0 | –3.7 (3.7) |
| yW | 3.9 | –12.3 | –5.0 (3.8) |
| o2yW | 1.4 | –10.8 | –1.6 (1.6) |

| Table S10: Average root-mean-square deviations in the backbone (avg. RMSD, Å) and standard deviations (in parentheses) for each *E. coli* tRNA over three MD simulation replicas, as well as the average (and standard deviation) between the replicas. | | | | |
| --- | --- | --- | --- | --- |
| System | avg. RMSD (Å) | | | |
| Replica 1 | Replica 2 | Replica 3 | Replica Avg. |
| A | 3.257 (0.6) | 3.313 (0.5) | 3.842 (0.7) | 3.471 (0.6) |
| i6A | 3.451 (0.6) | 3.392 (0.7) | 3.401 (0.7) | 3.415 (0.7) |
| io6A | 3.986 (0.8) | 3.420 (0.7) | 3.519 (0.6) | 3.642 (0.7) |
| ms2i6A | 3.671 (0.8) | 4.062 (1.0) | 3.525 (0.7) | 3.753 (0.9) |
| t6A | 4.306 (0.7) | 3.881 (0.8) | 3.854 (0.7) | 4.014 (0.7) |
| m6t6A | 4.493 (0.9) | 4.587 (1.0) | 3.482 (0.6) | 4.187 (0.9) |
| ms2t6A | 4.821 (0.8) | 4.581 (0.7) | 4.596 (0.7) | 4.666 (0.7) |
| G | 3.771 (0.7) | 3.879 (0.7) | 3.915 (0.5) | 3.855 (0.6) |
| m1G | 3.897 (0.7) | 3.341 (0.7) | 3.803 (1.0) | 3.681 (0.9) |
| yW | 3.447 (0.6) | 3.439 (0.5) | 3.761 (0.9) | 3.549 (0.7) |
| o2yW | 3.625 (0.7) | 3.081 (0.6) | 3.314 (0.6) | 3.340 (0.6) |

| Table S11: Percent occupancy, average donor–acceptor (D–A) hydrogen-bond distances (Å) and average donor–hydrogen–acceptor hydrogen-bond angle (°) for hydrogen bonds in the anticodon stem loop of *E. coli* tRNA over three MD simulation replicas, as well as the average and standard deviation between replicas. | | | | | | | | | | | | | | |
| --- | --- | --- | --- | --- | --- | --- | --- | --- | --- | --- | --- | --- | --- | --- |
| Parameter | Base Pairs | H-Bond Interactions | Replica | A | G | m1G | i6A | io6A | ms2i6A | t6A | m6t6A | ms2t6A | yW | o2yW |
| Occupancy | U33–A/G37 | O2···H–N6/N1 | 1 | 90 | 10 | 0 | 53 | 29 | 57 | 9 | 0 | 40 | 0 | 0 |
| 2 | 75 | 1 | 0 | 69 | 61 | 61 | 21 | 0 | 23 | 0 | 0 |
| 3 | 48 | 0 | 0 | 60 | 61 | 60 | 31 | 0 | 20 | 0 | 0 |
| Average | 71 (18) | 4 (4) | 0 (0) | 61 (7) | 50 (15) | 59 (2) | 20 (9) | 0 (0) | 28 (9) | 0 (0) | 0 (0) |
| N3–H···O6 | 1 | 0 | 40 | 29 | 0 | 0 | 0 | 0 | 0 | 0 | 49 | 36 |
| 2 | 0 | 47 | 0 | 0 | 0 | 0 | 0 | 0 | 0 | 1 | 0 |
| 3 | 0 | 70 | 39 | 0 | 0 | 0 | 0 | 0 | 0 | 4 | 22 |
| Average | 0 (0) | 52 (13) | 23 (17) | 0 (0) | 0 (0) | 0 (0) | 0 (0) | 0 (0) | 0 (0) | 18 (22) | 19 (15) |
| Distance | U33–A/G37 | O2···H–N6/N1 | 1 | 2.9 | 2.9 | – | 3 | 3.1 | 2.9 | 2.9 | – | 3 | – | – |
| 2 | 2.9 | 3.0 | – | 3 | 3 | 3 | 3 | – | 3 | – | – |
| 3 | 2.9 | – | – | 3 | 3 | 3 | 3 | – | 3 | – | – |
| Average | 2.9 (0.0) | 2.9 (0.0) | – | 3.0 (0.0) | 3.0 (0.0) | 3.0 (0.0) | 3.0 (0.1) | – | 3.0 (0.0) | – | – |
| N3–H···O6 | 1 | – | 2.9 | 2.8 | – | – | – | – | – | – | 2.9 | 2.9 |
| 2 | – | 2.9 | 2.9 | – | – | – | – | – | – | 3.1 | – |
| 3 | – | 2.9 | 2.8 | – | – | – | – | – | – | 2.9 | 2.9 |
| Average | – | 2.9 (0.0) | 2.8 (0.0) | – | – | – | – | – | – | 3.0 (0.1) | 2.9 (0.0) |
| Angle | U33–A/G37 | O2···H–N6/N1 | 1 | 160.2 | 157.9 | – | 156 | 152.3 | 153.1 | 129.7 | – | 146.1 | – | – |
| 2 | 160 | 157.3 | – | 156.4 | 155.8 | 153.4 | 158 | – | 145 | – | – |
| 3 | 160.2 | – | – | 158.2 | 145 | 154.6 | 150.3 | – | 144 | – | – |
| Average | 160.1 (0.1) | 157.6 (0.3) | – | 156.9 (1.0) | 151.0 (4.5) | 153.7 (0.6) | 146.0 (12.0) | – | 145.0 (0.9) | – | – |
| N3–H···O6 | 1 | – | 149.5 | 146.0 | – | – | – | – | – | – | 152.6 | 145.8 |
| 2 | – | 147.5 | 147.9 | – | – | – | – | – | – | 148.1 | – |
| 3 | – | 149.8 | 146.5 | – | – | – | – | – | – | 144.0 | 145.2 |
| Average | – | 148.9 (1.0) | 146.8 (0.8) | – | – | – | – | – | – | 148.2 (3.5) | 145.5 (0.3) |

| Table S12: Base stacking propensities (percentage) between nucleotides in the anticodon stem loop of *E. coli* tRNA over three MD simulation replicas, as well as the average and standard deviation between replicas. | | | | | | | | | | | | |
| --- | --- | --- | --- | --- | --- | --- | --- | --- | --- | --- | --- | --- |
| Bases | Replica | A | G | m1G | i6A | io6A | ms2i6A | t6A | m6t6A | ms2t6A | yW | o2yW |
| 31-32 | 1 | 100 | 99 | 100 | 100 | 100 | 100 | 100 | 99 | 100 | 99 | 98 |
| 2 | 99 | 99 | 99 | 100 | 100 | 100 | 99 | 100 | 99 | 99 | 97 |
| 3 | 100 | 100 | 99 | 100 | 99 | 100 | 99 | 99 | 99 | 98 | 100 |
| Average | 100 (0) | 99(0) | 99 (0) | 100 (0) | 100 (0) | 100 (0) | 99 (0) | 99 (0) | 99 (0) | 99 (0) | 99 (1) |
| 32-33 | 1 | 98 | 87 | 93 | 77 | 92 | 72 | 28 | 45 | 57 | 70 | 36 |
| 2 | 92 | 80 | 93 | 89 | 88 | 79 | 42 | 94 | 63 | 70 | 81 |
| 3 | 90 | 16 | 91 | 73 | 80 | 82 | 62 | 46 | 60 | 100 | 56 |
| Average | 93 (3) | 61 (39) | 92 (1) | 80 (7) | 87 (5) | 78 (4) | 44 (14) | 62 (23) | 60 (2) | 80 (14) | 58 (18) |
| 33-34 | 1 | 0 | 0 | 0 | 0 | 0 | 0 | 0 | 0 | 0 | 0 | 0 |
| 2 | 0 | 0 | 0 | 0 | 0 | 0 | 2 | 0 | 0 | 0 | 0 |
| 3 | 0 | 0 | 0 | 1 | 0 | 0 | 0 | 0 | 0 | 0 | 0 |
| Average | 0 (0) | 0 (0) | 0 (0) | 0 (1) | 0 (0) | 0 (0) | 1(1) | 0(0) | (0) | (0) | 0 |
| 34-35 | 1 | 14 | 84 | 99 | 56 | 4 | 70 | 67 | 35 | 58 | 83 | 83 |
| 2 | 36 | 93 | 79 | 27 | 51 | 51 | 76 | 100 | 62 | 49 | 87 |
| 3 | 34 | 90 | 98 | 50 | 99 | 68 | 62 | 88 | 67 | 34 | 69 |
| Average | 28 (10) | 89 (4) | 92 (9) | 44 (13) | 51 (39) | 63 (9) | 68 (6) | 74 (28) | 62 (4) | 55 (20) | 80 (8) |
| 35-36 | 1 | 96 | 99 | 100 | 97 | 16 | 94 | 10 | 37 | 39 | 94 | 99 |
| 2 | 97 | 99 | 80 | 75 | 90 | 95 | 53 | 2 | 66 | 87 | 99 |
| 3 | 90 | 8 | 99 | 96 | 33 | 94 | 95 | 100 | 83 | 90 | 98 |
| Average | 94 (3) | 69 (43) | 93 (9) | 89 (10) | 46 (31) | 94 (0) | 53 (35) | 46 (41) | 63 (18) | 90 (3) | 99 (0) |
| 36-37 | 1 | 100 | 100 | 100 | 79 | 84 | 77 | 95 | 69 | 100 | 100 | 70 |
| 2 | 100 | 100 | 100 | 69 | 57 | 76 | 53 | 2 | 66 | 100 | 50 |
| 3 | 98 | 16 | 100 | 79 | 27 | 72 | 46 | 19 | 67 | 100 | 56 |
| Average | 99 (1) | 72 (40) | 100 (0) | 76 (5) | 56 (23) | 75 (2) | 65 (22) | 30 (28) | 78 (16) | 100 (0) | 59 (8) |
| 37-38 | 1 | 100 | 98 | 100 | 100 | 98 | 100 | 98 | 82 | 84 | 100 | 97 |
| 2 | 100 | 100 | 100 | 100 | 99 | 100 | 83 | 1 | 92 | 100 | 85 |
| 3 | 99 | 100 | 100 | 100 | 99 | 100 | 86 | 32 | 98 | 100 | 86 |
| Average | 100 (0) | 99 (1) | 100 (0) | 100 (0) | 99 (1) | 100 (0) | 89 (6) | 38 (33) | 91 (6) | 100 (0) | 89 (5) |
| 38-39 | 1 | 100 | 100 | 100 | 100 | 100 | 100 | 100 | 100 | 99 | 100 | 100 |
| 2 | 100 | 100 | 100 | 100 | 100 | 100 | 53 | 2 | 66 | 100 | 100 |
| 3 | 97 | 100 | 100 | 100 | 100 | 100 | 100 | 100 | 100 | 100 | 100 |
| Average | 99 (1) | 100 (0) | 100 (0) | 100 (0) | 100 (0) | 100 (0) | 84 (22) | 67 (46) | 88 (16) | 100 (0) | 100 (0) |

| Table S13: Average root-mean-square deviations in the backbone (avg. RMSD, Å) and standard deviations (in parentheses) for each yeast tRNA over three MD simulation replicas, as well as the average (and standard deviation) between the replicas. | | | | |
| --- | --- | --- | --- | --- |
| System | avg. RMSD (Å) | | | |
| Replica 1 | Replica 2 | Replica 3 | Replica Avg. |
| G | 3.250 (0.6) | 3.409 (0.6) | 2.940 (0.6) | 3.200 (0.6) |
| m1G | 3.012 (0.6) | 3.038 (0.6) | 3.220 (0.5) | 3.090 (0.6) |
| yW | 3.108 (0.5) | 3.118 (0.7) | 2.964 (0.5) | 3.063 (0.6) |

| Table S14: Base stacking propensities (percentage) between nucleotides in the anticodon stem loop of yeast tRNA over three MD simulation replicas, as well as the average and standard deviation between replicas. | | | | |
| --- | --- | --- | --- | --- |
| Bases | Replica | G | m1G | yW |
| 31-32 | 1 | 95 | 98 | 84 |
| 2 | 92 | 98 | 91 |
| 3 | 99 | 97 | 99 |
| Average | 95 (3) | 98 (0) | 91 (6) |
| 32-33 | 1 | 95 | 97 | 61 |
| 2 | 88 | 98 | 81 |
| 3 | 96 | 97 | 98 |
| Average | 93 (4) | 97 (0) | 80 (15) |
| 33-34 | 1 | 0 | 0 | 0 |
| 2 | 0 | 0 | 0 |
| 3 | 0 | 0 | 0 |
| Average | 0 (0) | 0 (0) | 0 (0) |
| 34-35 | 1 | 91 | 100 | 65 |
| 2 | 95 | 97 | 100 |
| 3 | 100 | 94 | 15 |
| Average | 95 (4) | 97 (2) | 60 (35) |
| 35-36 | 1 | 97 | 100 | 89 |
| 2 | 99 | 100 | 100 |
| 3 | 100 | 99 | 100 |
| Average | 99 (1) | 100 (0) | 96 (5) |
| 36-37 | 1 | 100 | 100 | 100 |
| 2 | 100 | 100 | 52 |
| 3 | 100 | 100 | 100 |
| Average | 100 (0) | 100 (0) | 84 (23) |
| 37-38 | 1 | 100 | 100 | 100 |
| 2 | 100 | 100 | 75 |
| 3 | 100 | 100 | 100 |
| Average | 100 (0) | 100 (0) | 92 (12) |
| 38-39 | 1 | 100 | 100 | 100 |
| 2 | 100 | 100 | 100 |
| 3 | 100 | 100 | 100 |
| Average | 100 (0) | 100 (0) | 100 (0) |

| Table S15: Percent occupancy, average donor–acceptor (D–A) hydrogen-bond distances (Å) and average donor–hydrogen–acceptor hydrogen-bond angle (°) for hydrogen bonds in the anticodon stem loop of yeast tRNA over three MD simulation replicas, as well as the average and standard deviation between replicas. | | | | | | |
| --- | --- | --- | --- | --- | --- | --- |
| Parameter | Base  Pairs | H-Bond  Interactions | Replica | G | m1G | yW |
| Occupancy | U33–G37 | O2···H–N6/N1 | 1 | 0 | 0 | 0 |
| 2 | 2 | 0 | 0 |
| 3 | 0 | 0 | 0 |
| Average | 1 (1) | 0 (0) | 0 (0) |
| N3–H···O6 | 1 | 2 | 0 | 0 |
| 2 | 19 | 0 | 0 |
| 3 | 0 | 24 | 0 |
| Average | 7 (9) | 8 (11) | 0 (0) |
| Distance | U33–G37 | O2···H–N6/N1 | 1 | — | — | — |
| 2 | 3.0 | — | — |
| 3 | — | — | — |
| Average | 3.0 (0.0) | — | — |
| N3–H···O6 | 1 | 3.0 | — | — |
| 2 | 2.9 | — | — |
| 3 | — | 2.7 | — |
| Average | 3.0 (0.1) | 2.7 (0.0) | — |
| Angle | U33–G37 | O2···H–N6/N1 | 1 | — | — | — |
| 2 | 154.0 | — | — |
| 3 | — | — | — |
| Average | 154.0 (0.0) | — | — |
| N3–H···O6 | 1 | 138.5 | — | — |
| 2 | 145.5 | — | — |
| 3 | — | 143.6 | — |
| Average | 142.0 (3.5) | 143.6 (0.0) | — |

| Table S16: Atomic names, coordinates, AMBER atom types and partial charges for modified base i6A | | | | | | | |
| --- | --- | --- | --- | --- | --- | --- | --- |
| Atom number | Atom Name | X | Y | Z | Atom types | PDB code | Partial charges |
| 1 | P | 1.8650 | 2.8970 | 1.3650 | P | I6A | 1.161600 |
| 2 | O5' | 2.8260 | 2.6700 | 0.0000 | OS | I6A | -0.517900 |
| 3 | OP1 | 0.8360 | 1.8100 | 1.4240 | O2 | I6A | -0.765500 |
| 4 | OP2 | 2.8100 | 3.2670 | 2.4670 | O2 | I6A | -0.765900 |
| 5 | O3' | 0.0000 | 0.0000 | 0.0000 | OS | I6A | -0.531300 |
| 6 | C5' | 2.1570 | 2.1960 | -1.1640 | CT | I6A | 0.120000 |
| 7 | H5'1 | 2.7450 | 2.5400 | -2.0210 | H1 | I6A | 0.061600 |
| 8 | H5'2 | 1.1480 | 2.6210 | -1.2550 | H1 | I6A | 0.061600 |
| 9 | C4' | 2.0440 | 0.6780 | -1.2280 | CT | I6A | 0.106800 |
| 10 | H4' | 1.4630 | 0.4090 | -2.1230 | H1 | I6A | 0.065700 |
| 11 | O4' | 3.3630 | 0.1100 | -1.3270 | OS | I6A | -0.321700 |
| 12 | C1' | 3.4490 | -1.0980 | -0.6030 | CT | I6A | 0.003500 |
| 13 | H1' | 3.7890 | -1.9130 | -1.2510 | H2 | I6A | 0.159800 |
| 14 | C3' | 1.4050 | -0.0000 | 0.0000 | CT | I6A | 0.248800 |
| 15 | H3' | 1.7410 | 0.5090 | 0.9100 | H1 | I6A | 0.079600 |
| 16 | C2' | 2.0400 | -1.3990 | -0.0480 | CT | I6A | 0.022900 |
| 17 | H2' | 2.0840 | -1.8950 | 0.9260 | H1 | I6A | 0.110100 |
| 18 | O2' | 1.2620 | -2.1450 | -0.9780 | OH | I6A | -0.587100 |
| 19 | HO2' | 1.5090 | -3.0760 | -0.9070 | HO | I6A | 0.421900 |
| 20 | N1 | 6.4490 | -3.6270 | 2.7030 | NC | I6A | -0.634300 |
| 21 | C2 | 5.5620 | -4.0450 | 1.7850 | CD | I6A | 0.476800 |
| 22 | H2 | 5.4480 | -5.1250 | 1.7110 | H5 | I6A | 0.070600 |
| 23 | N3 | 4.8050 | -3.3190 | 0.9560 | NC | I6A | -0.690800 |
| 24 | C4 | 5.0290 | -2.0060 | 1.1310 | CB | I6A | 0.410400 |
| 25 | C5 | 5.9030 | -1.4130 | 2.0420 | CB | I6A | 0.053300 |
| 26 | C6 | 6.6420 | -2.3010 | 2.8580 | CA | I6A | 0.443700 |
| 27 | N6 | 7.5220 | -1.8410 | 3.7780 | N2 | I6A | -0.389200 |
| 28 | H6 | 7.6170 | -0.8370 | 3.8380 | H | I6A | 0.283800 |
| 29 | N7 | 5.8610 | -0.0330 | 1.9530 | NB | I6A | -0.568300 |
| 30 | C8 | 4.9810 | 0.2030 | 1.0050 | CK | I6A | 0.079800 |
| 31 | H8 | 4.6670 | 1.1750 | 0.6520 | H5 | I6A | 0.215600 |
| 32 | N9 | 4.4390 | -0.9530 | 0.4640 | N* | I6A | -0.041500 |
| 33 | C10 | 8.3280 | -2.6750 | 4.6640 | CT | I6A | 0.130500 |
| 34 | H101 | 9.3700 | -2.6840 | 4.3260 | H1 | I6A | 0.054100 |
| 35 | H102 | 7.9470 | -3.6940 | 4.5470 | H1 | I6A | 0.054100 |
| 36 | C11 | 8.2080 | -2.2200 | 6.0930 | CM | I6A | -0.323600 |
| 37 | H11 | 7.1860 | -2.2180 | 6.4720 | HA | I6A | 0.151500 |
| 38 | C12 | 9.1880 | -1.8280 | 6.9220 | CM | I6A | 0.117800 |
| 39 | C13 | 10.6530 | -1.7650 | 6.5670 | CT | I6A | -0.091800 |
| 40 | H131 | 11.2290 | -2.4670 | 7.1830 | HC | I6A | 0.040600 |
| 41 | H132 | 10.8600 | -1.9960 | 5.5200 | HC | I6A | 0.040600 |
| 42 | H133 | 11.0560 | -0.7660 | 6.7790 | HC | I6A | 0.040600 |
| 43 | C14 | 8.8730 | -1.4150 | 8.3400 | CT | I6A | -0.302400 |
| 44 | H141 | 9.4020 | -2.0510 | 9.0610 | HC | I6A | 0.089400 |
| 45 | H142 | 9.2060 | -0.3860 | 8.5320 | HC | I6A | 0.089400 |
| 46 | H143 | 7.8030 | -1.4740 | 8.5550 | HC | I6A | 0.089400 |

| Table S17: Atomic names, coordinates, AMBER atom types and partial charges for modified base io6A | | | | | | | |
| --- | --- | --- | --- | --- | --- | --- | --- |
| Atom number | Atom Name | X | Y | Z | Atom types | PDB code | Partial charges |
| 1 | P | 1.8590 | 2.8740 | 1.3700 | P | OIA | 1.161600 |
| 2 | O5' | 2.8190 | 2.6730 | 0.0000 | OS | OIA | -0.517900 |
| 3 | OP1 | 0.8500 | 1.7680 | 1.4250 | O2 | OIA | -0.765500 |
| 4 | OP2 | 2.8010 | 3.2530 | 2.4710 | O2 | OIA | -0.765900 |
| 5 | O3' | 0.0000 | 0.0000 | 0.0000 | OS | OIA | -0.531300 |
| 6 | C5' | 2.1550 | 2.1960 | -1.1650 | CT | OIA | 0.109600 |
| 7 | H5'1 | 2.7450 | 2.5410 | -2.0200 | H1 | OIA | 0.069800 |
| 8 | H5'2 | 1.1450 | 2.6180 | -1.2590 | H1 | OIA | 0.069800 |
| 9 | C4' | 2.0440 | 0.6770 | -1.2280 | CT | OIA | 0.080400 |
| 10 | H4' | 1.4640 | 0.4070 | -2.1230 | H1 | OIA | 0.076000 |
| 11 | O4' | 3.3640 | 0.1100 | -1.3250 | OS | OIA | -0.356300 |
| 12 | C1' | 3.4490 | -1.0970 | -0.5990 | CT | OIA | 0.019500 |
| 13 | H1' | 3.7930 | -1.9120 | -1.2470 | H2 | OIA | 0.163000 |
| 14 | C3' | 1.4050 | -0.0000 | 0.0000 | CT | OIA | 0.334400 |
| 15 | H3' | 1.7410 | 0.5100 | 0.9090 | H1 | OIA | 0.042900 |
| 16 | C2' | 2.0400 | -1.3990 | -0.0480 | CT | OIA | 0.003400 |
| 17 | H2' | 2.0820 | -1.8970 | 0.9250 | H1 | OIA | 0.110100 |
| 18 | O2' | 1.2640 | -2.1440 | -0.9800 | OH | OIA | -0.596400 |
| 19 | H6 | 1.5100 | -3.0750 | -0.9080 | HO | OIA | 0.426900 |
| 20 | N1 | 6.3800 | -3.6250 | 2.7650 | NC | OIA | -0.650900 |
| 21 | C2 | 5.4970 | -4.0420 | 1.8440 | CQ | OIA | 0.498500 |
| 22 | H2 | 5.3660 | -5.1200 | 1.7820 | H5 | OIA | 0.065600 |
| 23 | N3 | 4.7600 | -3.3150 | 0.9970 | NC | OIA | -0.700300 |
| 24 | C4 | 5.0030 | -2.0030 | 1.1570 | CB | OIA | 0.403400 |
| 25 | C5 | 5.8770 | -1.4110 | 2.0700 | CB | OIA | 0.045900 |
| 26 | C6 | 6.5910 | -2.3010 | 2.9070 | CA | OIA | 0.460600 |
| 27 | N6 | 7.4640 | -1.8430 | 3.8340 | N2 | OIA | -0.372700 |
| 28 | H6 | 7.5780 | -0.8410 | 3.8830 | H | OIA | 0.278600 |
| 29 | N7 | 5.8560 | -0.0330 | 1.9630 | NB | OIA | -0.573500 |
| 30 | C8 | 4.9880 | 0.2050 | 1.0040 | CK | OIA | 0.086500 |
| 31 | H8 | 4.6920 | 1.1770 | 0.6370 | H5 | OIA | 0.223000 |
| 32 | N9 | 4.4350 | -0.9500 | 0.4720 | N* | OIA | -0.030200 |
| 33 | C10 | 8.2380 | -2.6810 | 4.7470 | CT | OIA | 0.053000 |
| 34 | H101 | 9.2650 | -2.7890 | 4.3810 | H1 | OIA | 0.066000 |
| 35 | H102 | 7.7820 | -3.6750 | 4.7080 | H1 | OIA | 0.066000 |
| 36 | C11 | 8.1910 | -2.1290 | 6.1450 | CM | OIA | -0.169500 |
| 37 | H11 | 7.1930 | -2.0170 | 6.5620 | HA | OIA | 0.146000 |
| 38 | C12 | 9.2270 | -1.7690 | 6.9130 | CM | OIA | 0.063300 |
| 39 | C13 | 10.6850 | -1.8460 | 6.5330 | CT | OIA | -0.184700 |
| 40 | H131 | 11.2110 | -2.5960 | 7.1380 | HC | OIA | 0.059500 |
| 41 | H132 | 10.8390 | -2.1040 | 5.4840 | HC | OIA | 0.059500 |
| 42 | H133 | 11.1870 | -0.8870 | 6.7170 | HC | OIA | 0.059500 |
| 43 | C14 | 9.0050 | -1.2400 | 8.3120 | CT | OIA | 0.033100 |
| 44 | H141 | 9.5700 | -1.8730 | 9.0190 | H1 | OIA | 0.068000 |
| 45 | H142 | 9.4540 | -0.2320 | 8.3770 | H1 | OIA | 0.068000 |
| 46 | O15 | 7.6270 | -1.2090 | 8.6390 | OH | OIA | -0.658300 |
| 47 | H15 | 7.5420 | -0.8490 | 9.5300 | HO | OIA | 0.439100 |

| Table S18: Atomic names, coordinates, AMBER atom types and partial charges for modified base ms2i6A | | | | | | | |
| --- | --- | --- | --- | --- | --- | --- | --- |
| Atom number | Atom Name | X | Y | Z | Atom types | PDB code | Partial charges |
| 1 | P | 1.8840 | 2.8750 | 1.3760 | P | SIA | 1.161600 |
| 2 | O5' | 2.8330 | 2.6700 | 0.0000 | OS | SIA | -0.517900 |
| 3 | OP1 | 0.8680 | 1.7750 | 1.4370 | O2 | SIA | -0.765500 |
| 4 | OP2 | 2.8350 | 3.2470 | 2.4720 | O2 | SIA | -0.765900 |
| 5 | O3' | 0.0000 | 0.0000 | 0.0000 | OS | SIA | -0.531300 |
| 6 | C5' | 2.1590 | 2.1980 | -1.1620 | CT | SIA | 0.108100 |
| 7 | H5'1 | 2.7430 | 2.5430 | -2.0200 | H1 | SIA | 0.069300 |
| 8 | H5'2 | 1.1500 | 2.6240 | -1.2470 | H1 | SIA | 0.069300 |
| 9 | C4' | 2.0430 | 0.6800 | -1.2270 | CT | SIA | 0.099900 |
| 10 | H4' | 1.4600 | 0.4130 | -2.1210 | H1 | SIA | 0.064300 |
| 11 | O4' | 3.3610 | 0.1090 | -1.3320 | OS | SIA | -0.376300 |
| 12 | C1' | 3.4470 | -1.0970 | -0.6060 | CT | SIA | 0.070900 |
| 13 | H1' | 3.7890 | -1.9120 | -1.2530 | H2 | SIA | 0.142000 |
| 14 | C3' | 1.4050 | -0.0000 | 0.0000 | CT | SIA | 0.386900 |
| 15 | H3' | 1.7400 | 0.5080 | 0.9110 | H1 | SIA | 0.020700 |
| 16 | C2' | 2.0400 | -1.3990 | -0.0510 | CT | SIA | 0.003600 |
| 17 | H2' | 2.0840 | -1.8980 | 0.9220 | H1 | SIA | 0.093600 |
| 18 | O2' | 1.2620 | -2.1440 | -0.9820 | OH | SIA | -0.600400 |
| 19 | HO2' | 1.5000 | -3.0770 | -0.9020 | HO | SIA | 0.427700 |
| 20 | N1 | 6.3880 | -3.6270 | 2.7410 | NC | SIA | -0.225600 |
| 21 | C2 | 5.4840 | -4.0410 | 1.8410 | CQ | SIA | 0.380000 |
| 22 | N3 | 4.7440 | -3.3070 | 1.0000 | NC | SIA | -0.519700 |
| 23 | C4 | 5.0040 | -2.0000 | 1.1480 | CB | SIA | 0.240400 |
| 24 | C5 | 5.8980 | -1.4110 | 2.0420 | CB | SIA | 0.247900 |
| 25 | C6 | 6.6170 | -2.3040 | 2.8690 | CA | SIA | 0.051500 |
| 26 | N6 | 7.5120 | -1.8510 | 3.7760 | N2 | SIA | -0.249000 |
| 27 | H6 | 7.6660 | -0.8530 | 3.7870 | H | SIA | 0.276800 |
| 28 | N7 | 5.8890 | -0.0320 | 1.9250 | NB | SIA | -0.594300 |
| 29 | C8 | 5.0110 | 0.2070 | 0.9780 | CK | SIA | 0.084200 |
| 30 | H8 | 4.7160 | 1.1790 | 0.6080 | H5 | SIA | 0.219400 |
| 31 | N9 | 4.4370 | -0.9480 | 0.4630 | N* | SIA | -0.013600 |
| 32 | C10 | 8.3390 | -2.6920 | 4.6380 | CT | SIA | 0.014100 |
| 33 | H101 | 9.3160 | -2.8720 | 4.1720 | H1 | SIA | 0.050500 |
| 34 | H102 | 7.8360 | -3.6610 | 4.6970 | H1 | SIA | 0.050500 |
| 35 | C11 | 8.4750 | -2.0790 | 6.0040 | CM | SIA | -0.279300 |
| 36 | H11 | 7.5260 | -1.9280 | 6.5190 | HA | SIA | 0.137600 |
| 37 | C12 | 9.6000 | -1.7060 | 6.6340 | CM | SIA | 0.124100 |
| 38 | C13 | 10.9940 | -1.8340 | 6.0710 | CT | SIA | -0.061300 |
| 39 | H132 | 11.5950 | -2.5180 | 6.6850 | HC | SIA | 0.037100 |
| 40 | H132 | 11.0200 | -2.2000 | 5.0440 | HC | SIA | 0.037100 |
| 41 | H133 | 11.5070 | -0.8640 | 6.0980 | HC | SIA | 0.037100 |
| 42 | C14 | 9.5400 | -1.1140 | 8.0210 | CT | SIA | -0.334600 |
| 43 | H141 | 10.1130 | -1.7220 | 8.7330 | HC | SIA | 0.096500 |
| 44 | H142 | 9.9870 | -0.1110 | 8.0390 | HC | SIA | 0.096500 |
| 45 | H143 | 8.5140 | -1.0370 | 8.3900 | HC | SIA | 0.096500 |
| 46 | S15 | 5.1790 | -5.7910 | 1.6890 | S | SIA | -0.234700 |
| 47 | C16 | 6.3010 | -6.4850 | 2.9480 | CT | SIA | -0.098100 |
| 48 | H161 | 6.0320 | -6.1340 | 3.9450 | H1 | SIA | 0.076500 |
| 49 | H162 | 6.1770 | -7.5690 | 2.8910 | H1 | SIA | 0.076500 |
| 50 | H163 | 7.3360 | -6.2180 | 2.7340 | H1 | SIA | 0.076500 |

| Table S19: Atomic names, coordinates, AMBER atom types and partial charges for modified base t6A. | | | | | | | |
| --- | --- | --- | --- | --- | --- | --- | --- |
| Atom number | Atom Name | X | Y | Z | Atom types | PDB code | Partial charges |
| 1 | P | 1.8640 | 2.9670 | 1.3390 | P | T6A | 1.161600 |
| 2 | O5' | 2.8370 | 2.6550 | 0.0000 | OS | T6A | -0.517900 |
| 3 | OP1 | 0.7760 | 1.9390 | 1.4020 | O2 | T6A | -0.765500 |
| 4 | OP2 | 2.8050 | 3.3120 | 2.4520 | O2 | T6A | -0.765900 |
| 5 | O3' | 0.0000 | 0.0000 | 0.0000 | OS | T6A | -0.531300 |
| 6 | C5' | 2.1660 | 2.1910 | -1.1670 | CT | T6A | 0.125100 |
| 7 | H5'1 | 2.7560 | 2.5310 | -2.0240 | H1 | T6A | 0.068500 |
| 8 | H5'2 | 1.1600 | 2.6220 | -1.2570 | H1 | T6A | 0.068500 |
| 9 | C4' | 2.0440 | 0.6730 | -1.2300 | CT | T6A | 0.069700 |
| 10 | H4' | 1.4640 | 0.4050 | -2.1250 | H1 | T6A | 0.077200 |
| 11 | O4' | 3.3630 | 0.0990 | -1.3300 | OS | T6A | -0.343600 |
| 12 | C1' | 3.4490 | -1.0990 | -0.5940 | CT | T6A | 0.029200 |
| 13 | H1' | 3.8010 | -1.9180 | -1.2300 | H2 | T6A | 0.157600 |
| 14 | C3' | 1.4040 | -0.0000 | 0.0000 | CT | T6A | 0.342400 |
| 15 | H3' | 1.7380 | 0.5150 | 0.9070 | H1 | T6A | 0.042400 |
| 16 | C2' | 2.0390 | -1.4000 | -0.0430 | CT | T6A | -0.010400 |
| 17 | H2' | 2.0780 | -1.8950 | 0.9320 | H1 | T6A | 0.106000 |
| 18 | O2' | 1.2670 | -2.1450 | -0.9780 | OH | T6A | -0.581700 |
| 19 | HO2' | 1.4960 | -3.0800 | -0.8960 | HO | T6A | 0.422600 |
| 20 | N1 | 6.4710 | -3.5440 | 2.7580 | NC | T6A | -0.251200 |
| 21 | C2 | 5.5940 | -3.9970 | 1.8430 | CQ | T6A | 0.260600 |
| 22 | H2 | 5.4980 | -5.0780 | 1.7880 | H5 | T6A | 0.120600 |
| 23 | N3 | 4.8350 | -3.2870 | 1.0060 | NC | T6A | -0.591800 |
| 24 | C4 | 5.0380 | -1.9700 | 1.1580 | CB | T6A | 0.382400 |
| 25 | C5 | 5.9080 | -1.3520 | 2.0630 | CB | T6A | 0.202300 |
| 26 | C6 | 6.6500 | -2.2190 | 2.8900 | CA | T6A | 0.084900 |
| 27 | N6 | 7.5290 | -1.7070 | 3.8080 | N | T6A | -0.157200 |
| 28 | H6 | 7.5960 | -0.6970 | 3.8420 | H | T6A | 0.277000 |
| 29 | N7 | 5.8500 | 0.0230 | 1.9550 | NB | T6A | -0.574900 |
| 30 | C8 | 4.9660 | 0.2330 | 1.0050 | CK | T6A | 0.080400 |
| 31 | H8 | 4.6410 | 1.1980 | 0.6390 | H5 | T6A | 0.239600 |
| 32 | N9 | 4.4360 | -0.9350 | 0.4790 | N* | T6A | -0.047200 |
| 33 | C10 | 8.3770 | -2.3310 | 4.7530 | C | T6A | 0.343800 |
| 34 | O11 | 9.0620 | -1.6260 | 5.4850 | O | T6A | -0.542900 |
| 35 | N12 | 8.3580 | -3.6870 | 4.7700 | N | T6A | -0.053600 |
| 36 | H12 | 7.7510 | -4.1860 | 4.1190 | H | T6A | -0.003300 |
| 37 | C13 | 9.2070 | -4.4180 | 5.6900 | CT | T6A | 0.018700 |
| 38 | H13 | 10.1390 | -3.8680 | 5.8370 | H1 | T6A | 0.113000 |
| 39 | C14 | 9.5120 | -5.7750 | 5.0720 | C | T6A | 0.638500 |
| 40 | C15 | 8.5440 | -4.5680 | 7.0890 | CT | T6A | 0.312500 |
| 41 | H15 | 8.4200 | -3.5370 | 7.4530 | H1 | T6A | 0.019800 |
| 42 | O16 | 10.7640 | -6.1910 | 5.3270 | OH | T6A | -0.588900 |
| 43 | H16 | 10.8440 | -7.0770 | 4.9330 | HO | T6A | 0.447000 |
| 44 | O17 | 8.7160 | -6.4230 | 4.4220 | O | T6A | -0.540300 |
| 45 | O18 | 9.4900 | -5.2740 | 7.8870 | OH | T6A | -0.700000 |
| 46 | H18 | 9.1380 | -5.3250 | 8.7850 | HO | T6A | 0.433300 |
| 47 | C19 | 7.1870 | -5.2690 | 7.0650 | CT | T6A | -0.156000 |
| 48 | H191 | 6.7690 | -5.3030 | 8.0780 | HC | T6A | 0.040200 |
| 49 | H192 | 6.4770 | -4.7300 | 6.4320 | HC | T6A | 0.040200 |
| 50 | H193 | 7.2790 | -6.2920 | 6.6930 | HC | T6A | 0.040200 |

| Table S20: Atomic names, coordinates, AMBER atom types and partial charges for modified base m6t6A. | | | | | | | |
| --- | --- | --- | --- | --- | --- | --- | --- |
| Atom number | Atom Name | X | Y | Z | Atom types | PDB code | Partial charges |
| 1 | P | 1.8580 | 2.9520 | 1.3420 | P | MTA | 1.161600 |
| 2 | O5' | 2.8320 | 2.6560 | 0.0000 | OS | MTA | -0.517900 |
| 3 | OP1 | 0.7810 | 1.9130 | 1.4020 | O2 | MTA | -0.765500 |
| 4 | OP2 | 2.7980 | 3.3020 | 2.4550 | O2 | MTA | -0.765900 |
| 5 | O3' | 0.0000 | 0.0000 | 0.0000 | OS | MTA | -0.531300 |
| 6 | C5' | 2.1640 | 2.1900 | -1.1680 | CT | MTA | 0.136700 |
| 7 | H5'1 | 2.7560 | 2.5310 | -2.0240 | H1 | MTA | 0.064800 |
| 8 | H5'2 | 1.1580 | 2.6200 | -1.2600 | H1 | MTA | 0.064800 |
| 9 | C4' | 2.0440 | 0.6720 | -1.2300 | CT | MTA | 0.090500 |
| 10 | H4' | 1.4640 | 0.4030 | -2.1250 | H1 | MTA | 0.061500 |
| 11 | O4' | 3.3630 | 0.0990 | -1.3300 | OS | MTA | -0.357500 |
| 12 | C1' | 3.4480 | -1.1010 | -0.5970 | CT | MTA | 0.049700 |
| 13 | H1' | 3.7930 | -1.9210 | -1.2370 | H2 | MTA | 0.153200 |
| 14 | C3' | 1.4050 | -0.0000 | 0.0000 | CT | MTA | 0.401000 |
| 15 | H3' | 1.7390 | 0.5160 | 0.9060 | H1 | MTA | 0.025000 |
| 16 | C2' | 2.0390 | -1.4000 | -0.0400 | CT | MTA | -0.044400 |
| 17 | H2' | 2.0820 | -1.8910 | 0.9370 | H1 | MTA | 0.112700 |
| 18 | O2' | 1.2640 | -2.1500 | -0.9690 | OH | MTA | -0.590000 |
| 19 | HO2' | 1.5040 | -3.0820 | -0.8900 | HO | MTA | 0.427000 |
| 20 | N1 | 6.4420 | -3.6140 | 2.6580 | NC | MTA | -0.225400 |
| 21 | C2 | 5.5500 | -4.0330 | 1.7510 | CQ | MTA | 0.247600 |
| 22 | H2 | 5.4340 | -5.1110 | 1.6770 | H5 | MTA | 0.131100 |
| 23 | N3 | 4.8000 | -3.2870 | 0.9420 | NC | MTA | -0.579800 |
| 24 | C4 | 5.0430 | -1.9840 | 1.1330 | CB | MTA | 0.316800 |
| 25 | C5 | 5.9390 | -1.3890 | 2.0440 | CB | MTA | 0.242800 |
| 26 | C6 | 6.6820 | -2.2980 | 2.8480 | CA | MTA | 0.030800 |
| 27 | N6 | 7.6120 | -1.9040 | 3.7900 | N | MTA | 0.051300 |
| 28 | N7 | 5.8730 | -0.0070 | 1.9320 | NB | MTA | -0.528900 |
| 29 | C8 | 4.9820 | 0.2160 | 0.9950 | CK | MTA | 0.031800 |
| 30 | H8 | 4.6600 | 1.1860 | 0.6420 | H5 | MTA | 0.234500 |
| 31 | N9 | 4.4410 | -0.9430 | 0.4700 | N* | MTA | -0.003600 |
| 32 | C10 | 8.3870 | -2.7570 | 4.6580 | C | MTA | 0.349900 |
| 33 | O11 | 9.1610 | -2.2540 | 5.4670 | O | MTA | -0.526300 |
| 34 | N12 | 8.2170 | -4.0940 | 4.5320 | N | MTA | -0.140700 |
| 35 | H12 | 7.5520 | -4.4400 | 3.8370 | H | MTA | 0.001300 |
| 36 | C13 | 8.9870 | -5.0060 | 5.3550 | CT | MTA | 0.025100 |
| 37 | H13 | 9.9860 | -4.5990 | 5.5210 | H1 | MTA | 0.110300 |
| 38 | C14 | 9.0990 | -6.3270 | 4.6040 | C | MTA | 0.659400 |
| 39 | C15 | 8.3420 | -5.2050 | 6.7560 | CT | MTA | 0.307400 |
| 40 | H15 | 8.3560 | -4.2060 | 7.2150 | H1 | MTA | 0.023400 |
| 41 | O16 | 10.2910 | -6.9220 | 4.7810 | OH | MTA | -0.588900 |
| 42 | H16 | 10.2470 | -7.7690 | 4.3050 | HO | MTA | 0.442900 |
| 43 | O17 | 8.2140 | -6.8030 | 3.9220 | O | MTA | -0.544500 |
| 44 | O18 | 9.2100 | -6.0930 | 7.4550 | OH | MTA | -0.704300 |
| 45 | H18 | 8.8740 | -6.1830 | 8.3560 | HO | MTA | 0.434200 |
| 46 | C19 | 6.9080 | -5.7290 | 6.7150 | CT | MTA | -0.110600 |
| 47 | H191 | 6.5100 | -5.8050 | 7.7330 | HC | MTA | 0.027300 |
| 48 | H192 | 6.2580 | -5.0520 | 6.1540 | HC | MTA | 0.027300 |
| 49 | H193 | 6.8630 | -6.7180 | 6.2510 | HC | MTA | 0.027300 |
| 50 | C20 | 7.8640 | -0.4610 | 3.9640 | CT | MTA | -0.099800 |
| 51 | H201 | 8.1940 | -0.0180 | 3.0240 | H1 | MTA | 0.073300 |
| 52 | H202 | 6.9540 | 0.0520 | 4.2790 | H1 | MTA | 0.073300 |
| 53 | H203 | 8.6340 | -0.3630 | 4.7230 | H1 | MTA | 0.073300 |

| Table S21: Atomic names, coordinates, AMBER atom types and partial charges for modified base ms2t6A. | | | | | | | |
| --- | --- | --- | --- | --- | --- | --- | --- |
| Atom number | Atom Name | X | Y | Z | Atom types | PDB code | Partial charges |
| 1 | P | 1.8090 | 2.9800 | 1.3200 | P | STA | 1.161600 |
| 2 | O5' | 2.8060 | 2.6630 | 0.0000 | OS | STA | -0.517900 |
| 3 | OP1 | 0.7250 | 1.9480 | 1.3720 | O2 | STA | -0.765500 |
| 4 | OP2 | 2.7310 | 3.3360 | 2.4460 | O2 | STA | -0.765900 |
| 5 | O3' | 0.0000 | 0.0000 | 0.0000 | OS | STA | -0.531300 |
| 6 | C5' | 2.1570 | 2.1880 | -1.1750 | CT | STA | 0.044600 |
| 7 | H5'1 | 2.7580 | 2.5270 | -2.0250 | H1 | STA | 0.097100 |
| 8 | H5'2 | 1.1500 | 2.6120 | -1.2820 | H1 | STA | 0.097100 |
| 9 | C4' | 2.0450 | 0.6690 | -1.2320 | CT | STA | 0.053900 |
| 10 | H4' | 1.4690 | 0.3930 | -2.1270 | H1 | STA | 0.080100 |
| 11 | O4' | 3.3660 | 0.1000 | -1.3230 | OS | STA | -0.329700 |
| 12 | C1' | 3.4530 | -1.0980 | -0.5860 | CT | STA | 0.018400 |
| 13 | H1' | 3.8070 | -1.9180 | -1.2200 | H2 | STA | 0.145000 |
| 14 | C3' | 1.4040 | -0.0000 | 0.0000 | CT | STA | 0.390700 |
| 15 | H3' | 1.7390 | 0.5180 | 0.9050 | H1 | STA | 0.029900 |
| 16 | C2' | 2.0400 | -1.3990 | -0.0400 | CT | STA | -0.033500 |
| 17 | H2' | 2.0740 | -1.8940 | 0.9360 | H1 | STA | 0.105400 |
| 18 | O2' | 1.2700 | -2.1430 | -0.9780 | OH | STA | -0.580000 |
| 19 | HO2' | 1.5010 | -3.0770 | -0.9010 | HO | STA | 0.420200 |
| 20 | N1 | 6.5760 | -3.5240 | 2.6870 | NC | STA | -0.141900 |
| 21 | C2 | 5.7240 | -3.9880 | 1.7480 | CQ | STA | 0.212400 |
| 22 | N2 | 4.9350 | -3.2810 | 0.9370 | NC | STA | -0.292300 |
| 23 | C3 | 5.0800 | -1.9610 | 1.1360 | CB | STA | 0.111500 |
| 24 | C4 | 5.9200 | -1.3370 | 2.0620 | CB | STA | 0.308700 |
| 25 | C5 | 6.6930 | -2.2010 | 2.8650 | CA | STA | 0.017800 |
| 26 | N6 | 7.5400 | -1.6800 | 3.8070 | N | STA | -0.174300 |
| 27 | H6 | 7.5570 | -0.6690 | 3.8730 | H | STA | 0.281700 |
| 28 | N7 | 5.8060 | 0.0370 | 1.9980 | NB | STA | -0.597100 |
| 29 | C8 | 4.9200 | 0.2430 | 1.0510 | CK | STA | 0.125600 |
| 30 | H8 | 4.5620 | 1.2050 | 0.7080 | H5 | STA | 0.210500 |
| 31 | N9 | 4.4380 | -0.9320 | 0.4870 | N* | STA | 0.004600 |
| 32 | C10 | 8.4110 | -2.2910 | 4.7400 | C | STA | 0.381100 |
| 33 | O11 | 9.0530 | -1.5740 | 5.5000 | O | STA | -0.549900 |
| 34 | N12 | 8.4620 | -3.6450 | 4.7130 | N | STA | -0.100300 |
| 35 | H12 | 7.8920 | -4.1540 | 4.0390 | H | STA | 0.030700 |
| 36 | C13 | 9.3490 | -4.3630 | 5.6090 | CT | STA | 0.029200 |
| 37 | H13 | 10.2390 | -3.7600 | 5.7950 | H1 | STA | 0.111700 |
| 38 | C14 | 9.7510 | -5.6650 | 4.9270 | C | STA | 0.641200 |
| 39 | C15 | 8.6830 | -4.6280 | 6.9880 | CT | STA | 0.339000 |
| 40 | H15 | 8.4840 | -3.6290 | 7.4030 | H1 | STA | 0.010700 |
| 41 | O16 | 11.0290 | -6.0030 | 5.1710 | OH | STA | -0.595800 |
| 42 | H16 | 11.1720 | -6.8600 | 4.7340 | HO | STA | 0.449800 |
| 43 | O17 | 9.0040 | -6.3330 | 4.2420 | O | STA | -0.542700 |
| 44 | O18 | 9.6670 | -5.3080 | 7.7630 | OH | STA | -0.702500 |
| 45 | H18 | 9.3020 | -5.4460 | 8.6460 | HO | STA | 0.427300 |
| 46 | C19 | 7.3770 | -5.4170 | 6.9110 | CT | STA | -0.144200 |
| 47 | H191 | 6.9520 | -5.5310 | 7.9150 | HC | STA | 0.033100 |
| 48 | H192 | 6.6380 | -4.8970 | 6.2950 | HC | STA | 0.033100 |
| 49 | H193 | 7.5420 | -6.4120 | 6.4890 | HC | STA | 0.033100 |
| 50 | S20 | 5.7180 | -5.7610 | 1.6540 | S | STA | -0.140400 |
| 51 | C21 | 4.4980 | -6.0450 | 0.3290 | CT | STA | -0.139200 |
| 52 | H211 | 4.4590 | -7.1270 | 0.1900 | H1 | STA | 0.081900 |
| 53 | H212 | 3.5130 | -5.6750 | 0.6200 | H1 | STA | 0.081900 |
| 54 | H213 | 4.8120 | -5.5630 | -0.5970 | H1 | STA | 0.081900 |

| Table S22: Atomic names, coordinates, AMBER atom types and partial charges for modified base m1G. | | | | | | | |
| --- | --- | --- | --- | --- | --- | --- | --- |
| Atom number | Atom Name | X | Y | Z | Atom types | PDB code | Partial charges |
| 1 | P | 4.3962 | -0.3689 | 1.3340 | P | 1MG | 1.1616 |
| 2 | O5' | 4.3577 | 0.6586 | 0.0000 | OS | 1MG | -0.5179 |
| 3 | OP1 | 2.9952 | -0.6022 | 1.8107 | O2 | 1MG | -0.7655 |
| 4 | OP2 | 5.3926 | -1.4347 | 0.9948 | O2 | 1MG | -0.7659 |
| 5 | O3' | 0.0000 | 0.0000 | 0.0000 | OS | 1MG | -0.5313 |
| 6 | C5' | 3.3878 | 1.7015 | 0.0398 | CT | 1MG | 0.0304 |
| 7 | H5'1 | 3.2540 | 2.0838 | 1.0618 | H1 | 1MG | 0.0953 |
| 8 | H5'2 | 3.7820 | 2.5164 | -0.5742 | H1 | 1MG | 0.0953 |
| 9 | C4' | 2.0215 | 1.3100 | -0.5310 | CT | 1MG | 0.0699 |
| 10 | H4' | 1.3336 | 2.1426 | -0.3249 | H1 | 1MG | 0.0856 |
| 11 | O4' | 2.0913 | 1.1419 | -1.9605 | OS | 1MG | -0.4348 |
| 12 | C3' | 1.4319 | -0.0000 | -0.0000 | CT | 1MG | 0.1141 |
| 13 | H3' | 1.7253 | -0.2273 | 1.0288 | H1 | 1MG | 0.1279 |
| 14 | C2' | 1.9441 | -1.0454 | -1.0105 | CT | 1MG | 0.2535 |
| 15 | H2' | 2.9710 | -1.3306 | -0.7695 | H1 | 1MG | 0.0476 |
| 16 | O2' | 1.1635 | -2.2091 | -1.0521 | OH | 1MG | -0.6593 |
| 17 | HO2' | 0.2651 | -1.9277 | -0.8110 | HO | 1MG | 0.4315 |
| 18 | C1' | 1.9444 | -0.2321 | -2.3331 | CT | 1MG | 0.1294 |
| 19 | H1' | 0.9966 | -0.3830 | -2.8629 | H1 | 1MG | 0.0870 |
| 20 | N1 | 2.8274 | -1.8812 | -7.0618 | N* | 1MG | -0.0871 |
| 21 | C2 | 1.6472 | -1.6048 | -6.4099 | CA | 1MG | 0.5523 |
| 22 | N2 | 0.4747 | -1.8559 | -7.0909 | N2 | 1MG | -0.8469 |
| 23 | H21 | 0.4648 | -1.7061 | -8.0888 | H1 | 1MG | 0.3871 |
| 24 | H22 | -0.3312 | -1.4882 | -6.6048 | H1 | 1MG | 0.3871 |
| 25 | N3 | 1.5554 | -1.1713 | -5.1710 | NC | 1MG | -0.5564 |
| 26 | C4 | 2.7585 | -1.0244 | -4.5710 | CB | 1MG | 0.0843 |
| 27 | C5 | 4.0228 | -1.2389 | -5.1060 | CB | 1MG | 0.1582 |
| 28 | C6 | 4.1436 | -1.7024 | -6.4577 | CA | 1MG | 0.3913 |
| 29 | O6 | 5.1463 | -1.9525 | -7.1074 | O | 1MG | -0.5074 |
| 30 | N7 | 5.0077 | -0.9480 | -4.1780 | NB | 1MG | -0.5374 |
| 31 | C8 | 4.3547 | -0.5746 | -3.1095 | CK | 1MG | 0.0715 |
| 32 | H8 | 4.7920 | -0.2469 | -2.1766 | H5 | 1MG | 0.1905 |
| 33 | N9 | 2.9709 | -0.6049 | -3.2763 | N* | 1MG | 0.1331 |
| 34 | C10 | 2.8110 | -2.4130 | -8.4242 | CT | 1MG | -0.0450 |
| 35 | H101 | 2.1738 | -3.2995 | -8.4797 | HC | 1MG | 0.0598 |
| 36 | H102 | 2.4598 | -1.6617 | -9.1420 | HC | 1MG | 0.0598 |
| 37 | H103 | 3.8398 | -2.6711 | -8.6700 | HC | 1MG | 0.0598 |

| Table S23: Atomic names, coordinates, AMBER atom types and partial charges for modified base yW. | | | | | | | |
| --- | --- | --- | --- | --- | --- | --- | --- |
| Atom number | Atom Name | X | Y | Z | Atom types | PDB code | Partial charges |
| 1 | P | 1.9580 | 3.0500 | 1.3170 | P | YYW | 1.161600 |
| 2 | O5' | 2.9050 | 2.5990 | 0.0000 | OS | YYW | -0.517900 |
| 3 | OP1 | 0.7660 | 2.1460 | 1.3940 | O2 | YYW | -0.765500 |
| 4 | OP2 | 2.9200 | 3.3240 | 2.4330 | O2 | YYW | -0.765900 |
| 5 | O3' | 0.0000 | 0.0000 | 0.0000 | OS | YYW | -0.531300 |
| 6 | C5' | 2.2020 | 2.1770 | -1.1610 | CT | YYW | 0.065800 |
| 7 | H5'1 | 2.7820 | 2.5100 | -2.0280 | H1 | YYW | 0.079100 |
| 8 | H5'2 | 1.2050 | 2.6320 | -1.2260 | H1 | YYW | 0.079100 |
| 9 | C4' | 2.0420 | 0.6620 | -1.2360 | CT | YYW | 0.123400 |
| 10 | H4' | 1.4400 | 0.4160 | -2.1260 | H1 | YYW | 0.054800 |
| 11 | O4' | 3.3420 | 0.0660 | -1.3580 | OS | YYW | -0.388800 |
| 12 | C1' | 3.3880 | -1.1960 | -0.7290 | CT | YYW | 0.089900 |
| 13 | H1' | 3.5410 | -1.9790 | -1.4740 | H2 | YYW | 0.164900 |
| 14 | C3' | 1.4090 | -0.0000 | 0.0000 | CT | YYW | 0.357900 |
| 15 | H3' | 1.7290 | 0.5300 | 0.9010 | H1 | YYW | 0.031600 |
| 16 | C2' | 2.0330 | -1.4130 | -0.0160 | CT | YYW | 0.090800 |
| 17 | H2' | 2.1720 | -1.8280 | 0.9870 | H1 | YYW | 0.066200 |
| 18 | O2' | 1.2480 | -2.2920 | -0.8260 | OH | YYW | -0.630500 |
| 19 | HO2' | 0.5600 | -2.6720 | -0.2640 | HO | YYW | 0.435100 |
| 20 | N9 | 4.5250 | -1.1960 | 0.1980 | N* | YYW | 0.007400 |
| 21 | C4 | 5.2350 | -2.2510 | 0.7290 | CB | YYW | -0.043300 |
| 22 | C8 | 4.9920 | -0.0550 | 0.8670 | CK | YYW | 0.122200 |
| 23 | H8 | 4.5950 | 0.9200 | 0.6220 | H5 | YYW | 0.186900 |
| 24 | N3 | 5.1590 | -3.5930 | 0.4570 | N* | YYW | 0.000400 |
| 25 | C5 | 6.0920 | -1.6920 | 1.6770 | CB | YYW | 0.136200 |
| 26 | N7 | 5.9190 | -0.3230 | 1.7390 | NB | YYW | -0.525200 |
| 27 | C2 | 6.0260 | -4.4020 | 1.1840 | CB | YYW | 0.160300 |
| 28 | C10 | 4.3810 | -4.2240 | -0.6110 | CT | YYW | 0.044700 |
| 29 | H101 | 4.7670 | -3.9420 | -1.5970 | H1 | YYW | 0.038000 |
| 30 | H102 | 3.3240 | -3.9570 | -0.5410 | H1 | YYW | 0.038000 |
| 31 | H103 | 4.4920 | -5.3000 | -0.4850 | H1 | YYW | 0.038000 |
| 32 | C6 | 7.0110 | -2.4810 | 2.4590 | C | YYW | 0.448800 |
| 33 | N1 | 6.8910 | -3.8690 | 2.1300 | N* | YYW | -0.015100 |
| 34 | N11 | 6.1210 | -5.7010 | 1.0740 | NB | YYW | -0.448100 |
| 35 | O6 | 7.8050 | -2.0850 | 3.3000 | O | YYW | -0.448600 |
| 36 | C12 | 7.5900 | -4.9750 | 2.6640 | CA | YYW | -0.113800 |
| 37 | C13 | 7.0960 | -6.0670 | 1.9950 | CC | YYW | 0.201000 |
| 38 | C14 | 8.6330 | -4.8570 | 3.7320 | CT | YYW | -0.080000 |
| 39 | H141 | 8.7910 | -5.8530 | 4.1590 | HC | YYW | 0.054900 |
| 40 | H142 | 8.2640 | -4.2220 | 4.5410 | HC | YYW | 0.054900 |
| 41 | C15 | 7.4670 | -7.5070 | 2.1470 | CT | YYW | -0.265700 |
| 42 | H151 | 8.2180 | -7.6520 | 2.9270 | HC | YYW | 0.089500 |
| 43 | H152 | 6.5880 | -8.1100 | 2.4010 | HC | YYW | 0.089500 |
| 44 | H153 | 7.8700 | -7.9060 | 1.2090 | HC | YYW | 0.089500 |
| 45 | C16 | 9.9810 | -4.2970 | 3.2260 | CT | YYW | -0.031600 |
| 46 | H161 | 9.8130 | -3.4490 | 2.5590 | HC | YYW | 0.053900 |
| 47 | H162 | 10.5060 | -5.0630 | 2.6430 | HC | YYW | 0.053900 |
| 48 | C17 | 10.8970 | -3.8120 | 4.3680 | CT | YYW | 0.136100 |
| 49 | H171 | 11.0530 | -4.6230 | 5.0830 | H1 | YYW | -0.005400 |
| 50 | C18 | 12.2380 | -3.3730 | 3.7420 | C | YYW | 0.599800 |
| 51 | N19 | 10.2630 | -2.7100 | 5.0670 | N | YYW | -0.498600 |
| 52 | H19 | 9.5620 | -2.1660 | 4.5760 | H | YYW | 0.294700 |
| 53 | O20 | 12.3810 | -2.2940 | 3.2250 | O | YYW | -0.516100 |
| 54 | O21 | 13.2650 | -4.2660 | 3.6920 | OS | YYW | -0.406700 |
| 55 | C22 | 10.7810 | -2.1290 | 6.1870 | C | YYW | 0.721000 |
| 56 | C23 | 13.2400 | -5.4870 | 4.4360 | CT | YYW | 0.080300 |
| 57 | H231 | 12.4620 | -6.1710 | 4.0800 | H1 | YYW | 0.053200 |
| 58 | H232 | 14.2140 | -5.9490 | 4.2690 | H1 | YYW | 0.053200 |
| 59 | H233 | 13.1100 | -5.3000 | 5.5060 | H1 | YYW | 0.053200 |
| 60 | O24 | 10.3530 | -1.1300 | 6.7320 | O | YYW | -0.587700 |
| 61 | O25 | 11.8550 | -2.8450 | 6.6500 | OS | YYW | -0.231600 |
| 62 | C26 | 12.4630 | -2.2930 | 7.8240 | CT | YYW | -0.195300 |
| 63 | H261 | 13.3000 | -2.9510 | 8.0600 | H1 | YYW | 0.119300 |
| 64 | H262 | 12.8190 | -1.2780 | 7.6350 | H1 | YYW | 0.119300 |
| 65 | H263 | 11.7530 | -2.2660 | 8.6540 | H1 | YYW | 0.119300 |

| Table S24: Atomic names, coordinates, AMBER atom types and partial charges for modified base o2yW. | | | | | | | |
| --- | --- | --- | --- | --- | --- | --- | --- |
| Atom number | Atom Name | X | Y | Z | Atom types | PDB code | Partial charges |
| 1 | P | 1.9710 | 3.0260 | 1.3290 | P | PYW | 1.161600 |
| 2 | O5' | 2.9130 | 2.5970 | 0.0000 | OS | PYW | -0.517900 |
| 3 | OP1 | 0.7900 | 2.1080 | 1.4070 | O2 | PYW | -0.765500 |
| 4 | OP2 | 2.9390 | 3.3010 | 2.4390 | O2 | PYW | -0.765900 |
| 5 | O3' | 0.0000 | 0.0000 | 0.0000 | OS | PYW | -0.531300 |
| 6 | C5' | 2.2050 | 2.1770 | -1.1590 | CT | PYW | 0.056700 |
| 7 | H5'1 | 2.7830 | 2.5100 | -2.0260 | H1 | PYW | 0.084500 |
| 8 | H5'2 | 1.2090 | 2.6350 | -1.2210 | H1 | PYW | 0.084500 |
| 9 | C4' | 2.0420 | 0.6620 | -1.2360 | CT | PYW | 0.099900 |
| 10 | H4' | 1.4390 | 0.4200 | -2.1260 | H1 | PYW | 0.067100 |
| 11 | O4' | 3.3400 | 0.0640 | -1.3620 | OS | PYW | -0.371900 |
| 12 | C1' | 3.3890 | -1.1950 | -0.7270 | CT | PYW | 0.062400 |
| 13 | H1' | 3.5480 | -1.9800 | -1.4680 | H2 | PYW | 0.171300 |
| 14 | C3' | 1.4090 | -0.0000 | 0.0000 | CT | PYW | 0.332000 |
| 15 | H3' | 1.7280 | 0.5290 | 0.9020 | H1 | PYW | 0.046100 |
| 16 | C2' | 2.0320 | -1.4130 | -0.0170 | CT | PYW | 0.097700 |
| 17 | H2' | 2.1690 | -1.8310 | 0.9850 | H1 | PYW | 0.066800 |
| 18 | O2' | 1.2480 | -2.2900 | -0.8300 | OH | PYW | -0.628600 |
| 19 | HO2' | 0.5630 | -2.6760 | -0.2690 | HO | PYW | 0.436800 |
| 20 | N9 | 4.5230 | -1.1870 | 0.2050 | N* | PYW | 0.007300 |
| 21 | C4 | 5.2150 | -2.2400 | 0.7610 | CB | PYW | -0.031100 |
| 22 | C8 | 5.0010 | -0.0390 | 0.8530 | CK | PYW | 0.112500 |
| 23 | H8 | 4.6140 | 0.9350 | 0.5900 | H5 | PYW | 0.195100 |
| 24 | N3 | 5.1240 | -3.5870 | 0.5130 | N* | PYW | -0.004300 |
| 25 | C5 | 6.0740 | -1.6730 | 1.7040 | CB | PYW | 0.157800 |
| 26 | N7 | 5.9190 | -0.3010 | 1.7360 | NB | PYW | -0.525200 |
| 27 | C2 | 5.9660 | -4.3940 | 1.2700 | CB | PYW | 0.165500 |
| 28 | C10 | 4.3700 | -4.2220 | -0.5690 | CT | PYW | 0.040700 |
| 29 | H101 | 4.7790 | -3.9440 | -1.5470 | H1 | PYW | 0.040300 |
| 30 | H102 | 3.3120 | -3.9540 | -0.5240 | H1 | PYW | 0.040300 |
| 31 | H103 | 4.4770 | -5.2970 | -0.4350 | H1 | PYW | 0.040300 |
| 32 | C6 | 6.9780 | -2.4600 | 2.5050 | CA | PYW | 0.401900 |
| 33 | N1 | 6.8200 | -3.8520 | 2.2220 | N* | PYW | 0.001200 |
| 34 | N11 | 6.0490 | -5.6950 | 1.1850 | NB | PYW | -0.463800 |
| 35 | O6 | 7.7900 | -2.0600 | 3.3270 | O | PYW | -0.446100 |
| 36 | C12 | 7.4940 | -4.9560 | 2.7910 | CA | PYW | -0.087400 |
| 37 | C13 | 7.0040 | -6.0540 | 2.1300 | CC | PYW | 0.174900 |
| 38 | C14 | 8.4960 | -4.8380 | 3.8940 | CT | PYW | -0.113700 |
| 39 | H141 | 8.6310 | -5.8220 | 4.3480 | HC | PYW | 0.072700 |
| 40 | H142 | 8.1290 | -4.1680 | 4.6730 | HC | PYW | 0.072700 |
| 41 | C15 | 7.3640 | -7.4930 | 2.3200 | CT | PYW | -0.094800 |
| 42 | H151 | 8.2440 | -7.6020 | 2.9590 | HC | PYW | 0.043100 |
| 43 | H152 | 6.5390 | -8.0560 | 2.7710 | HC | PYW | 0.043100 |
| 44 | H153 | 7.5790 | -7.9590 | 1.3530 | HC | PYW | 0.043100 |
| 45 | C16 | 9.8750 | -4.3330 | 3.4310 | CT | PYW | 0.036400 |
| 46 | H16 | 9.7630 | -3.5040 | 2.7250 | H1 | PYW | 0.181500 |
| 47 | C17 | 10.7730 | -3.8250 | 4.5850 | CT | PYW | 0.033300 |
| 48 | H17 | 10.9410 | -4.6330 | 5.2950 | H1 | PYW | 0.064900 |
| 49 | C18 | 12.0920 | -3.3080 | 3.9570 | C | PYW | 0.717300 |
| 50 | N19 | 10.0820 | -2.7450 | 5.2720 | N | PYW | -0.408600 |
| 51 | H19 | 9.4670 | -2.1490 | 4.7290 | H | PYW | 0.257400 |
| 52 | O20 | 12.0800 | -2.3490 | 3.2220 | O | PYW | -0.560800 |
| 53 | O21 | 13.2650 | -3.9200 | 4.2230 | OS | PYW | -0.435000 |
| 54 | C22 | 10.4360 | -2.2470 | 6.4930 | C | PYW | 0.717300 |
| 55 | C23 | 13.3520 | -5.0540 | 5.1000 | CT | PYW | 0.120800 |
| 56 | H231 | 12.7790 | -5.8990 | 4.7100 | H1 | PYW | 0.036700 |
| 57 | H232 | 14.4110 | -5.3130 | 5.1270 | H1 | PYW | 0.036700 |
| 58 | H233 | 13.0160 | -4.7960 | 6.1080 | H1 | PYW | 0.036700 |
| 59 | O24 | 9.9390 | -1.2750 | 7.0260 | O | PYW | -0.586900 |
| 60 | O25 | 11.4210 | -3.0050 | 7.0680 | OS | PYW | -0.260400 |
| 61 | C26 | 11.8270 | -2.5480 | 8.3660 | CT | PYW | -0.159300 |
| 62 | H261 | 12.6120 | -3.2330 | 8.6870 | H1 | PYW | 0.112300 |
| 63 | H262 | 12.2090 | -1.5260 | 8.3140 | H1 | PYW | 0.112300 |
| 64 | H263 | 10.9880 | -2.5740 | 9.0660 | H1 | PYW | 0.112300 |
| 65 | O27 | 10.5710 | -5.2860 | 2.6320 | OS | PYW | -0.261800 |
| 66 | O28 | 10.7810 | -6.4920 | 3.4540 | OH | PYW | -0.354400 |
| 67 | H28 | 10.8690 | -7.1330 | 2.7310 | HO | PYW | 0.416800 |
